# Supplementary material
Source: publisher figshare collection journal article supplement (https://springernature.figshare.com/ndownloader/files/13564322)
Supplement: Supplementary file 1 [file 13564322]

mnemonic	year	X1_1_6_6_1	X1_1_7_6_1	X1_1_7_4_1	X1_1_9_3_1	X1_1_6_5_1	X1_1_7_2_1	X1_1_7_3_1	X2_2_1_1_1	X1_1_8_4_1	X1_1_4_6_1	X1_1_5_2_1	X1_2_1_1_1	X1_1_7_1_1	X1_2_2_2_1	X1_1_8_3_1	X1_1_8_5_1	X1_1_4_5_1	X1_1_9_1_1	X1_2_2_1_1	X1_1_1_2_2	X1_1_1_5_1	X1_1_4_2_1	X1_1_1_2_1	X1_1_7_7_1	X1_1_3_4_1	X1_1_2_5_1	X1_1_3_2_1	X1_1_2_1_1	X1_1_9_2_1	X1_1_2_6_1	X1_1_8_6_1	X1_1_6_3_1	X1_2_1_2_1	X1_1_2_4_1	X1_1_7_8_1	X1_1_6_2_1	X2_1_2_1_1	X1_1_2_5_2	X1_1_4_7_1	X1_1_4_3_1	X1_1_2_2_1	X1_1_8_1_1	X1_1_3_1_1	X2_1_1_1_1	X1_1_1_4_2	X1_1_6_1_1	X1_1_6_8_1	X1_2_2_3_1
E06000001	2010	0.438818249	0.549132065	0.551975528	0.294830896	0.1493618	0.168088402	0.576036299	1.716933602	0.268494305	0.361366153	0.231634689	0.269326187	0.351679389	0.759071253	0.709378557	0.228585179	0.805488304	0.015627549	0.089417789	0.804463598	0.882745781	0.807832421	1.090900909	0.314364261	0.446002735	0.346915131	0.130636229	0.735857095	0.06427367	2.05346741	0.044063955	0.219205434	0.206086925	0.81647145	0.593016483	0.198106548	1.39690858	0.439335727	0.276988958	0.08855915	0.284883991	0.106732456	0.300796365	0.672472782	0.325441412	0.19378837	0.221888217	0.459655317
E06000002	2010	0.403747025	0.51347229	0.523387216	0.269341314	0.146695019	0.156308257	0.548015314	1.657957138	0.256469572	0.338718768	0.220304796	0.247964955	0.330254638	0.734387293	0.661734785	0.216803153	0.740852623	0.013652248	0.08760387	0.754330157	0.845177929	0.748755718	1.0293094	0.292161444	0.410422747	0.323616003	0.121975564	0.668185722	0.069256904	1.884192837	0.042560452	0.20800508	0.192448562	0.790463024	0.562011537	0.192162399	1.201459466	0.393628213	0.262801914	0.087530728	0.265447467	0.103079246	0.275128377	0.621330501	0.303079588	0.185925335	0.208355636	0.438560434
E06000003	2010	0.45603055	0.55801641	0.567493343	0.302928458	0.157156628	0.176550928	0.594079823	1.72093328	0.276299439	0.371087363	0.24321561	0.282449484	0.360122435	0.762414601	0.71889533	0.236856993	0.829649115	0.016179682	0.089796342	0.826100802	0.90644522	0.84647556	1.12297224	0.329501683	0.457643542	0.35925843	0.13202009	0.761885913	0.066550462	2.121047621	0.045371187	0.225480658	0.217557148	0.836901967	0.60328917	0.205415577	1.444981814	0.460072268	0.286688365	0.085725937	0.302289011	0.1121333	0.317820821	0.697699576	0.326218972	0.202317856	0.232607567	0.471515592
E06000004	2010	0.444287984	0.55327632	0.558470422	0.297500005	0.154643414	0.167707526	0.592962548	1.638025548	0.268116647	0.366907169	0.226339634	0.265811437	0.362262302	0.763268107	0.711790194	0.227000446	0.802189628	0.01531381	0.091768359	0.803961291	0.894708886	0.804467445	1.085737498	0.310138267	0.444347173	0.349081302	0.131648708	0.734318989	0.067715336	2.014425684	0.044306271	0.223571741	0.205999315	0.835133046	0.591384302	0.202424577	1.435980852	0.436748024	0.278883507	0.09105915	0.280578554	0.103895213	0.304388887	0.652938882	0.327063566	0.20037497	0.227254332	0.472673842
E06000005	2010	0.447084795	0.553869505	0.564665982	0.293820932	0.159789524	0.170193103	0.59745935	1.632825533	0.268481418	0.36505542	0.229092721	0.271330799	0.367035287	0.749156586	0.703523639	0.228722806	0.801480384	0.015309909	0.092643197	0.804580486	0.889204008	0.804838862	1.086604288	0.313968509	0.449919664	0.348864448	0.134357687	0.744948527	0.069610483	2.018872857	0.042817878	0.223375672	0.209316771	0.839261785	0.580607218	0.203899061	1.443551114	0.43669916	0.281547208	0.084547275	0.284483892	0.105987359	0.315269513	0.661030064	0.322176908	0.202925329	0.231889313	0.467889791
E06000006	2010	0.435905763	0.551921606	0.557455874	0.296243557	0.151576105	0.167159698	0.583293487	1.722876933	0.269216928	0.364215674	0.229588068	0.271719533	0.356233985	0.764707613	0.70733215	0.228251294	0.808599484	0.015342819	0.089969218	0.805939893	0.888305834	0.809295189	1.091402319	0.312621634	0.443253471	0.352099846	0.129941754	0.740675699	0.064817726	2.046815974	0.044394937	0.221122307	0.206543279	0.83193966	0.595521097	0.198746468	1.433396309	0.441447309	0.278023529	0.092370168	0.285522312	0.105835308	0.299081838	0.665681252	0.327803571	0.195347487	0.22346802	0.47046381
E06000007	2010	0.459635856	0.568252485	0.573376157	0.298139923	0.162829144	0.170649014	0.616519614	1.585935026	0.26691643	0.370692378	0.222232295	0.272218601	0.381690438	0.757472349	0.722836504	0.230490126	0.814441796	0.016040461	0.094955615	0.808791928	0.898757944	0.808158814	1.091486753	0.309243074	0.453282511	0.355705706	0.136691367	0.750618619	0.069176678	2.008190854	0.043854672	0.228705476	0.20923663	0.841608006	0.586873958	0.205439305	1.566038344	0.440337861	0.281306973	0.084901278	0.278667086	0.102728254	0.320810709	0.641059267	0.329757226	0.207607807	0.236762517	0.484264227
E06000008	2010	0.389576905	0.493870774	0.514374374	0.24377582	0.159434746	0.148531742	0.566986911	1.456898729	0.237484391	0.323001586	0.199204729	0.227319073	0.335629242	0.723331945	0.621165783	0.20438109	0.666730859	0.012654348	0.097753536	0.7043783	0.819548589	0.687519131	0.965170351	0.26897029	0.38302211	0.286810217	0.123198839	0.614177045	0.08103585	1.649977841	0.038626561	0.210262813	0.181289121	0.802741705	0.519704609	0.197984684	1.074675059	0.337475994	0.256306493	0.099290434	0.236614976	0.098088042	0.278878834	0.544242924	0.271811302	0.193467731	0.206365539	0.426341191
E06000009	2010	0.439735203	0.540654409	0.555273578	0.295406791	0.154701832	0.172852252	0.579790679	1.757882506	0.273488388	0.364849148	0.239281385	0.277529991	0.351125454	0.752860033	0.698899128	0.228875647	0.806063004	0.014828079	0.08894292	0.813475613	0.888274018	0.82450485	1.10410192	0.321040039	0.448664745	0.349999927	0.129705832	0.748004663	0.067678553	2.081074697	0.043846002	0.220071546	0.213195514	0.83402558	0.59027616	0.201768989	1.358469872	0.444308147	0.28259394	0.085928291	0.295404196	0.111120138	0.307842394	0.690905787	0.319957194	0.198930848	0.226307797	0.465976591
E06000010	2010	0.394034681	0.508273912	0.509898153	0.272489138	0.137501822	0.152095948	0.5278198	1.713703154	0.254770613	0.336344588	0.21608609	0.245649531	0.323154128	0.736612699	0.656215515	0.210559703	0.74172077	0.013853293	0.083898071	0.746107637	0.830565084	0.74041798	1.023131288	0.287207075	0.407190632	0.32177625	0.119504704	0.667375252	0.062679352	1.905731093	0.042788417	0.201085736	0.189623224	0.776137556	0.560727503	0.183520698	1.235359873	0.398992428	0.257462744	0.087869403	0.259516011	0.100413529	0.267127451	0.639527427	0.310932567	0.177406333	0.203649565	0.437584348
E06000011	2010	0.487466935	0.57418499	0.592242642	0.307341909	0.172815267	0.186412704	0.640866231	1.559665895	0.275085693	0.381847027	0.238016666	0.29292497	0.392587207	0.746148394	0.73424413	0.233611722	0.844354457	0.017351711	0.093650025	0.841187552	0.915619975	0.862925659	1.129807626	0.336167075	0.48093717	0.364361778	0.141823865	0.812670367	0.070327939	2.09530655	0.042571746	0.237960501	0.225604055	0.867170865	0.587740278	0.215828938	1.63246842	0.47990713	0.297272789	0.07541173	0.304333399	0.110066457	0.356791695	0.698114786	0.320817094	0.220460417	0.256620308	0.48570775
E06000012	2010	0.433470956	0.535578492	0.54559438	0.289155419	0.150453418	0.167173012	0.573443434	1.662808388	0.265151928	0.356656811	0.228279217	0.266283216	0.34921697	0.739158815	0.690318136	0.22198087	0.785196873	0.01481054	0.087768524	0.791069677	0.869570536	0.797464578	1.071890363	0.311321811	0.43976983	0.342210174	0.127986349	0.730784497	0.064733413	2.007634194	0.042885281	0.216696386	0.20513766	0.818334532	0.575504726	0.197292266	1.381829479	0.434531549	0.275164738	0.083828717	0.28391132	0.104875767	0.301350245	0.671025816	0.315648307	0.195181774	0.223308868	0.455665876
E06000013	2010	0.449843462	0.552442482	0.56430543	0.295969326	0.15716644	0.172220156	0.599516862	1.622697917	0.266198535	0.36457054	0.229040268	0.273313215	0.366555731	0.74504788	0.706173923	0.22473883	0.803321865	0.015757669	0.090887534	0.805698421	0.885749663	0.813035979	1.087421309	0.316116675	0.452581002	0.348777221	0.133366531	0.753002546	0.06796312	2.017169329	0.042391187	0.223996938	0.210439934	0.833219648	0.580351281	0.203484195	1.480048035	0.445312294	0.281950312	0.084701904	0.287148787	0.105600971	0.318272792	0.669859009	0.318794549	0.204313072	0.235265653	0.465565904
E06000014	2010	0.439595591	0.544582216	0.551900699	0.288949698	0.155587825	0.166030867	0.588766364	1.629715501	0.260390038	0.357161499	0.220919976	0.264137359	0.363941628	0.733739569	0.698647906	0.220470628	0.790006045	0.015242097	0.089733465	0.784485436	0.869389421	0.785549821	1.061464144	0.303420479	0.439912597	0.342217524	0.130669899	0.725999441	0.066763089	1.969448922	0.042516928	0.218660948	0.206430456	0.808299929	0.567545484	0.198908596	1.447801044	0.429226517	0.275873546	0.078265356	0.273309343	0.103627363	0.312154748	0.646534733	0.319452361	0.198804948	0.232777011	0.463626853
E06000015	2010	0.418904109	0.527972757	0.54121012	0.271924446	0.160890022	0.157817137	0.590505246	1.510103923	0.248779481	0.343279181	0.208092916	0.242761757	0.356763073	0.737596539	0.668748282	0.214325681	0.724639373	0.014158433	0.096440944	0.746163264	0.854052916	0.732026646	1.013755279	0.283676875	0.412935439	0.312946485	0.130301713	0.662018093	0.077087729	1.799944989	0.040885048	0.215838423	0.194681997	0.811252933	0.546778823	0.203259458	1.273216385	0.375814379	0.268481588	0.092429225	0.253570485	0.099502626	0.300827893	0.595742193	0.297098442	0.199597859	0.221961466	0.450175831
E06000016	2010	0.361114123	0.467384093	0.504898199	0.210226424	0.165907945	0.141141497	0.584206439	1.278777878	0.219181244	0.292206706	0.17614634	0.204529696	0.339981501	0.704453374	0.571434626	0.188203631	0.572533107	0.010141295	0.104753101	0.635922086	0.779543228	0.610686165	0.884725951	0.239362108	0.347362921	0.243599031	0.126238703	0.526381909	0.096066603	1.362048844	0.035826177	0.206996105	0.167250296	0.812618521	0.469384889	0.204085969	0.825172093	0.262115297	0.251631007	0.090765126	0.210762082	0.093863687	0.270623224	0.487873954	0.233857265	0.198965697	0.20397866	0.399501455
E06000017	2010	0.510719512	0.587921385	0.606149619	0.311788979	0.180815523	0.191511486	0.658998849	1.654211372	0.28061478	0.38858683	0.24387909	0.30300765	0.403935408	0.760877577	0.753545394	0.243259969	0.862147981	0.017130361	0.096870207	0.859663023	0.922852607	0.878266817	1.157963758	0.345338188	0.494934674	0.379864855	0.146793732	0.833029136	0.070819191	2.150360916	0.044395854	0.24360341	0.229389778	0.878280603	0.600328546	0.222122157	1.697915924	0.484734836	0.302747274	0.082429375	0.31260696	0.111609311	0.366592431	0.689968415	0.329335341	0.224915288	0.25942973	0.499877817
E06000018	2010	0.359893513	0.481136864	0.488841247	0.230903319	0.144762203	0.13911789	0.531752032	1.540755577	0.22577844	0.299134876	0.192059811	0.218809877	0.319856661	0.710054964	0.594749356	0.194380213	0.632250767	0.011827447	0.093188055	0.665867581	0.776684848	0.645993542	0.930090178	0.249817702	0.370253916	0.27337392	0.120004006	0.577264563	0.077594666	1.605975684	0.037168571	0.195168642	0.174442009	0.753119462	0.501933146	0.182369063	1.014328501	0.321156474	0.244209776	0.087146544	0.21845032	0.096493316	0.262123857	0.543184344	0.270892786	0.17951233	0.195308224	0.412804735
E06000019	2010	0.489912327	0.575265115	0.599003553	0.313029624	0.173631828	0.188542087	0.635844744	1.710644729	0.284807053	0.387151878	0.249065491	0.303325821	0.386794054	0.763180007	0.741589491	0.242482977	0.860440092	0.016135773	0.09371294	0.861848491	0.937716407	0.879123501	1.154707326	0.345463042	0.482715512	0.374587078	0.140956529	0.822727602	0.070890774	2.161314071	0.044500104	0.238587655	0.228475992	0.881689898	0.604146658	0.217725291	1.568991299	0.4836381	0.301637734	0.08294776	0.315716852	0.115674632	0.354790725	0.711883669	0.328769225	0.219550258	0.255541789	0.496317201
E06000020	2010	0.43826958	0.552007491	0.559026655	0.290711294	0.1554948	0.166083503	0.591213783	1.676083385	0.268882143	0.363539107	0.226117825	0.266743118	0.360680904	0.773475254	0.705503041	0.227759498	0.792695518	0.014845691	0.092823915	0.8014424	0.89393592	0.797649768	1.085265328	0.3079793	0.43946915	0.346213945	0.132502377	0.729353933	0.070241179	1.988997676	0.044198361	0.223007274	0.203394547	0.843338457	0.592574034	0.202211771	1.394397929	0.428574222	0.278656583	0.091685297	0.280061316	0.104786751	0.300252674	0.649571242	0.324408048	0.199587886	0.225650929	0.46991795
E06000021	2010	0.424830377	0.537808377	0.54778548	0.283569683	0.155215518	0.163253284	0.580241974	1.744174775	0.261413176	0.35265617	0.22647808	0.2629401	0.350634359	0.764471528	0.683638886	0.22227639	0.770494837	0.014499035	0.093374515	0.781881743	0.873229283	0.779963371	1.068159845	0.303280281	0.430503965	0.333173974	0.128349846	0.707671382	0.072009641	1.960241992	0.042867233	0.21805075	0.202517353	0.82763032	0.5795247	0.201657099	1.295657944	0.408788499	0.274854871	0.098343398	0.275440049	0.106808241	0.299584146	0.647551502	0.31329566	0.196539825	0.220273918	0.457458464
E06000022	2010	0.462380906	0.558079264	0.569549886	0.29346184	0.166844296	0.17335163	0.614754404	1.594835346	0.266369145	0.365560742	0.224794822	0.27620617	0.379750421	0.736613084	0.716764559	0.228210885	0.807970809	0.015560014	0.093375687	0.804510388	0.887395152	0.8068411	1.081610071	0.312306839	0.456870075	0.351198326	0.136336564	0.751482991	0.070250336	1.998240887	0.042927102	0.225967561	0.212541181	0.828082507	0.570559907	0.207223405	1.527854029	0.439522698	0.283462444	0.076209636	0.281102544	0.105444974	0.334477078	0.653913353	0.319397393	0.208784824	0.244054841	0.477717556
E06000023	2010	0.408602422	0.529830242	0.532047245	0.273841359	0.14970338	0.150898227	0.578272936	1.614680627	0.246849444	0.339577428	0.201436494	0.238279461	0.3578367	0.732199368	0.667417468	0.207562936	0.736163947	0.013839937	0.091876313	0.735638577	0.834887087	0.717587448	1.004842757	0.270737571	0.413990345	0.32059936	0.126613207	0.662054737	0.069847687	1.821918708	0.042612133	0.209444519	0.191518905	0.785150845	0.547459453	0.192644389	1.382153018	0.380957322	0.263360478	0.085503949	0.243234564	0.094884262	0.290440844	0.598858562	0.315666149	0.19110161	0.218157577	0.459662047
E06000024	2010	0.497364139	0.582684424	0.599813909	0.313933504	0.17670251	0.18610295	0.653213186	1.555224927	0.277195356	0.385666781	0.235210465	0.292461312	0.402497998	0.752783204	0.745592421	0.237411721	0.851689575	0.017198505	0.095895111	0.846313855	0.921234266	0.856611314	1.130487802	0.331504738	0.485150862	0.367277925	0.14499776	0.810294258	0.071598235	2.094759061	0.043427354	0.240095362	0.224696489	0.867375251	0.58970544	0.218391543	1.694466289	0.471589922	0.298733717	0.082876637	0.298764312	0.108028989	0.362626308	0.686500941	0.327554552	0.222388656	0.25854916	0.496059843
E06000025	2010	0.467228479	0.568878	0.575270409	0.300540755	0.164342278	0.171647653	0.620496706	1.592539793	0.269153123	0.376822373	0.22344385	0.272981259	0.38249404	0.760957458	0.731857986	0.230126495	0.81630246	0.015743926	0.09596515	0.81557799	0.904056715	0.814913006	1.095770573	0.312582623	0.457859427	0.358138807	0.138167591	0.761301261	0.068799401	2.018690235	0.044195287	0.231233045	0.210457741	0.850235464	0.589596771	0.208121828	1.567429024	0.447683141	0.28543713	0.084690473	0.2829483	0.102281678	0.324669209	0.652669102	0.330107113	0.210063111	0.241880355	0.485635548
E06000026	2010	0.435095833	0.549186865	0.550170557	0.290792659	0.152174897	0.165272101	0.582268237	1.724945017	0.262460591	0.357071775	0.22383562	0.266774242	0.356859487	0.7574336	0.702175266	0.223845547	0.791561327	0.014828498	0.091635374	0.790152746	0.87102003	0.787866575	1.072055973	0.305537227	0.440867079	0.34437445	0.12945594	0.726124586	0.06624098	2.000338518	0.043406462	0.218775829	0.205166415	0.820324058	0.580176488	0.199209294	1.410008554	0.427499667	0.275791144	0.088989693	0.277596483	0.104692685	0.305548444	0.654865081	0.322928701	0.196204785	0.226182173	0.46255049
E06000027	2010	0.481458786	0.565397059	0.591882207	0.314098005	0.169073192	0.190457348	0.624660505	1.724338435	0.285117154	0.38493132	0.254832376	0.300355233	0.376834291	0.755170172	0.731503463	0.238137982	0.85450815	0.0163439	0.091782069	0.860097381	0.927888988	0.880858555	1.154684648	0.34848922	0.481812301	0.367704407	0.138868517	0.811153947	0.070791185	2.175422889	0.044117202	0.235962724	0.230034512	0.871371045	0.60069959	0.217233946	1.489437135	0.47901401	0.302046023	0.084001426	0.3190425	0.117862773	0.351603076	0.739004047	0.320747798	0.217323007	0.250711958	0.483076731
E06000028	2010	0.436371897	0.538884353	0.549123344	0.288631631	0.156177593	0.165731518	0.590177517	1.630597353	0.258914196	0.354064552	0.216819821	0.258490327	0.36693543	0.731854577	0.693883683	0.216936496	0.778157209	0.015036666	0.090268536	0.780620704	0.861276392	0.773423555	1.054468832	0.297095572	0.439439881	0.335365439	0.132341548	0.713138891	0.0690518	1.949402634	0.042118047	0.217514367	0.204362319	0.806290544	0.560836948	0.199650947	1.444889326	0.417188643	0.275268309	0.077326215	0.267491987	0.10105933	0.312677648	0.659575394	0.317123006	0.200342253	0.233031127	0.463571375
E06000029	2010	0.474273584	0.564999585	0.5830838	0.31003189	0.166227489	0.181328007	0.624419468	1.648137498	0.27655944	0.384838011	0.240915054	0.283043051	0.380944769	0.755435096	0.730715841	0.230614599	0.830806867	0.015915168	0.093868293	0.839181342	0.918861226	0.847050113	1.12405765	0.330976259	0.47177114	0.359873555	0.138191217	0.782190335	0.070748606	2.106389544	0.043700675	0.233926653	0.221777426	0.861930111	0.59371055	0.213818539	1.528419811	0.461180009	0.296214392	0.086908951	0.298397585	0.109431927	0.338887493	0.697940345	0.328362953	0.21391499	0.246953034	0.484795089
E06000030	2010	0.437624647	0.556723287	0.563010578	0.286438541	0.162808756	0.163798113	0.610752429	1.581706673	0.257814971	0.359204237	0.214017391	0.25756082	0.376302998	0.761847479	0.701069643	0.222428624	0.776478184	0.015176268	0.097465717	0.780482962	0.883932758	0.770262792	1.061966887	0.294472624	0.43548877	0.335932676	0.135590898	0.711861569	0.075688117	1.909876596	0.043082705	0.22431691	0.202452094	0.843236665	0.574946345	0.204822747	1.44209891	0.406782209	0.276647693	0.092420264	0.26469643	0.100843913	0.308444	0.622703854	0.321024803	0.205552147	0.229363014	0.47627281
E06000031	2010	0.421555235	0.535568751	0.548198455	0.283257003	0.159383369	0.159643997	0.590580811	1.628999565	0.258781284	0.354632368	0.215023693	0.250963226	0.359588317	0.765673203	0.682782101	0.22016391	0.752237087	0.014185728	0.096136874	0.766421695	0.875990788	0.750683343	1.04243574	0.291730006	0.41943236	0.324543621	0.12840983	0.681958602	0.076433107	1.867680103	0.04274501	0.219167135	0.196953329	0.832115478	0.570199277	0.204571457	1.278648112	0.387108959	0.272455612	0.103045007	0.260392174	0.102633679	0.295718069	0.611441525	0.311859432	0.199888227	0.221388592	0.462257152
E06000032	2010	0.385572159	0.488187183	0.518569797	0.230572749	0.171884917	0.146137316	0.596376136	1.307096353	0.22744852	0.310528764	0.183075589	0.209314819	0.349722241	0.71722657	0.598146542	0.195865341	0.615502251	0.011125826	0.105543683	0.667887221	0.809956181	0.635492825	0.920242911	0.246137218	0.364393932	0.264410476	0.129195437	0.567959057	0.091059369	1.466222843	0.037668277	0.210911603	0.172332641	0.815959369	0.488017353	0.205032952	0.982820489	0.292663912	0.257978861	0.096301266	0.215164297	0.093160656	0.290694789	0.495681831	0.252050776	0.20561251	0.211141818	0.426704963
E06000033	2010	0.466309266	0.569507489	0.580894556	0.304578508	0.168678291	0.174798363	0.627044295	1.604433339	0.272945856	0.374523648	0.229507792	0.2750774	0.386373814	0.764092923	0.723052421	0.23350286	0.819626595	0.015991168	0.097001694	0.819771117	0.911546945	0.819417051	1.107412127	0.315438758	0.461448962	0.353097161	0.138164358	0.757839461	0.073389184	2.031184383	0.043765659	0.23164609	0.214486721	0.849348641	0.586981749	0.211589898	1.548614468	0.437993513	0.28852028	0.091629925	0.279818852	0.107062952	0.33567862	0.657777315	0.327229572	0.211269396	0.243735697	0.492596889
E06000034	2010	0.43673429	0.559483363	0.556468871	0.291945325	0.157847987	0.162491195	0.597175936	1.621774253	0.266235791	0.365807934	0.217305217	0.2580752	0.368308881	0.780526717	0.70923083	0.224927325	0.786178084	0.01512443	0.096684389	0.789309785	0.895322613	0.772101186	1.074947839	0.295185462	0.438761146	0.340677009	0.132597546	0.720314365	0.070335722	1.944180348	0.043795824	0.225141896	0.201905909	0.836526976	0.587459462	0.202630391	1.428081689	0.415706161	0.276841042	0.105771422	0.26142925	0.10289253	0.308552153	0.610629002	0.325948458	0.201433074	0.227041404	0.489087985
E06000035	2010	0.447311118	0.567351224	0.569149082	0.295060504	0.162709897	0.167403771	0.609884058	1.678162304	0.267897871	0.36779348	0.223937003	0.267419726	0.375768062	0.782092031	0.716094666	0.229834537	0.804764277	0.015706225	0.097922607	0.803101835	0.901560409	0.79499298	1.092290266	0.306041852	0.448248833	0.347230461	0.135224257	0.742388135	0.071400932	1.987560445	0.044173545	0.227107148	0.206755247	0.847200022	0.591370538	0.205967194	1.479002178	0.428845459	0.281622393	0.098516482	0.272731628	0.105107973	0.318481143	0.639932463	0.328974916	0.204829352	0.23341278	0.488279786
E06000036	2010	0.481826374	0.598827755	0.604272704	0.311043227	0.177988615	0.172351433	0.663399351	1.539279159	0.268724818	0.385906775	0.21531913	0.268236903	0.414673838	0.789675046	0.752591551	0.234062605	0.83391349	0.016905094	0.104261226	0.825656814	0.927176475	0.803553076	1.103134728	0.301956507	0.469571909	0.359949753	0.147603283	0.758901495	0.076615212	1.998573229	0.045825165	0.238282587	0.209126112	0.875870606	0.596178296	0.215049528	1.731722631	0.436399213	0.289418287	0.093131464	0.26836845	0.098915269	0.339478044	0.633736516	0.344667788	0.218797707	0.253126163	0.515345724
E06000037	2010	0.500254602	0.59946387	0.611596719	0.316143207	0.182958735	0.181801025	0.672736855	1.529481907	0.278044071	0.392367964	0.224795749	0.288016986	0.420398744	0.779899034	0.761519524	0.2389648	0.862848417	0.01748071	0.101251646	0.850659268	0.940203293	0.843481867	1.12946216	0.319183374	0.484427526	0.371474318	0.150114013	0.802821885	0.074765981	2.057072709	0.044693542	0.242600842	0.21911771	0.887538944	0.595932625	0.218930824	1.819597114	0.464631585	0.297370241	0.085638459	0.28338578	0.103367923	0.359639782	0.666133106	0.342348029	0.226665313	0.262704026	0.522486425
E06000038	2010	0.421333816	0.545888476	0.550203187	0.269602381	0.169060657	0.151687727	0.616884964	1.533485083	0.240221817	0.33930712	0.196035563	0.231286517	0.376654607	0.759436744	0.663101816	0.212260902	0.721851908	0.014214817	0.101924659	0.731805957	0.859550338	0.696181515	1.00126386	0.262893896	0.408942534	0.307481217	0.136480101	0.641984823	0.085907904	1.731893963	0.042354941	0.215094709	0.189659417	0.806812502	0.548289384	0.20382936	1.345977546	0.349438262	0.268953697	0.098847463	0.231640222	0.094868097	0.308457759	0.569466055	0.30327742	0.202565661	0.228238142	0.472827313
E06000039	2010	0.393054758	0.50218179	0.53383556	0.225417824	0.190543247	0.148766387	0.6371427	1.193782993	0.220762188	0.308316072	0.173877299	0.20340409	0.37429539	0.73959428	0.604327282	0.201541905	0.603081545	0.011122076	0.112766992	0.66647394	0.829599069	0.615397042	0.912720534	0.238034512	0.357432122	0.257816048	0.138230781	0.542158168	0.104637631	1.377121777	0.037781393	0.216159776	0.173516219	0.850897305	0.485959449	0.217040281	0.928474986	0.264879007	0.264706198	0.100539092	0.208756071	0.090253735	0.299856455	0.472471052	0.248195622	0.220789884	0.218298929	0.437388273
E06000040	2010	0.50375418	0.595576658	0.613821835	0.307757944	0.195856571	0.182280381	0.686211803	1.458432342	0.269571595	0.385609444	0.219840394	0.281231355	0.430489634	0.761550496	0.759349972	0.237840153	0.843906184	0.018450799	0.102414426	0.83236899	0.926457788	0.820593205	1.10918367	0.311738351	0.47531077	0.359648178	0.151338357	0.775405712	0.082564535	1.993494812	0.044717245	0.241902492	0.217020905	0.873546966	0.576934634	0.221492076	1.817194936	0.438201872	0.294566511	0.080352376	0.275568798	0.102199135	0.368107245	0.648995686	0.336275916	0.230604663	0.267084899	0.520452734
E06000041	2010	0.506914142	0.599448234	0.614084563	0.313484708	0.191762475	0.181674737	0.686657156	1.453657344	0.272006672	0.393184148	0.220629681	0.280366518	0.429391315	0.773667815	0.761658905	0.23987365	0.853377748	0.017749308	0.104615132	0.838462756	0.939834414	0.827391936	1.113979227	0.31239165	0.480895469	0.365368558	0.153786272	0.784869791	0.08088685	2.003270567	0.045876718	0.242891352	0.212813541	0.889030047	0.585406142	0.220424625	1.829422635	0.445574171	0.295439485	0.08658665	0.275540995	0.101315298	0.364406012	0.639890308	0.339398873	0.228960711	0.266376197	0.521662817
E06000042	2010	0.434987152	0.558433989	0.56787927	0.280970989	0.171971995	0.160800066	0.62709005	1.526964319	0.254662149	0.35530556	0.208238754	0.248607134	0.38317606	0.774213061	0.683604125	0.222135277	0.756910725	0.014514389	0.104027506	0.767592839	0.8888664	0.745175352	1.045276292	0.283018164	0.427728209	0.326037248	0.137007301	0.689969681	0.083188907	1.824104799	0.043232706	0.22636456	0.197630326	0.86073991	0.567688817	0.208812082	1.395459524	0.382755188	0.277597973	0.101483678	0.250634359	0.099959637	0.314541227	0.587478256	0.312782753	0.210012162	0.229883018	0.484615943
E06000043	2010	0.435355431	0.56453339	0.567221759	0.282102874	0.167888226	0.16224934	0.617074654	1.658802891	0.258431836	0.354431761	0.209066632	0.257340965	0.390539493	0.757780697	0.7009426	0.221154607	0.784352762	0.014901887	0.098932055	0.782730821	0.881641683	0.75639315	1.057018808	0.284885275	0.443375611	0.335788122	0.137556268	0.700565725	0.077352391	1.910078947	0.042930578	0.21972867	0.203751481	0.828763051	0.56816048	0.202519069	1.509456682	0.40149065	0.276510523	0.073421333	0.251076835	0.100141596	0.315935111	0.630878102	0.328057431	0.206408027	0.236683788	0.490444017
E06000044	2010	0.418944095	0.537579511	0.537993129	0.279905067	0.151689438	0.1561619	0.573811948	1.674160468	0.255914832	0.348217954	0.211040692	0.249101778	0.354014106	0.757217977	0.688630807	0.216370032	0.757590507	0.014174131	0.092202007	0.766847836	0.857694634	0.745006927	1.038857962	0.285439147	0.423159111	0.328115733	0.130401403	0.681522369	0.069652105	1.893809301	0.042460881	0.212453856	0.193791519	0.80225346	0.565563983	0.195162237	1.358199956	0.395871618	0.267125395	0.089697722	0.254065241	0.098683904	0.290424937	0.626281165	0.31974582	0.191614061	0.218281374	0.462849339
E06000045	2010	0.409795575	0.530512301	0.530847763	0.273809826	0.150867815	0.153190344	0.571107344	1.690768576	0.250771783	0.340605874	0.207895815	0.243706834	0.351151734	0.753519815	0.676225699	0.211974621	0.74214602	0.013964339	0.092519202	0.748455603	0.844568317	0.727993155	1.02226354	0.279039135	0.414310955	0.320495314	0.127899968	0.663533446	0.072318996	1.854636762	0.042465481	0.21001465	0.192850703	0.794515493	0.560586077	0.195097103	1.298816818	0.380321011	0.264977173	0.091655159	0.250538028	0.098803389	0.287669162	0.616776356	0.312576526	0.190038974	0.217400566	0.452188881
E06000046	2010	0.503351168	0.597323605	0.614310333	0.326080419	0.175472627	0.19729133	0.649589525	1.774767014	0.295041714	0.400579345	0.265553804	0.312143382	0.390245501	0.792772402	0.76588867	0.251467657	0.889378813	0.0174305	0.097058349	0.890764582	0.96234131	0.91972704	1.202834389	0.36456399	0.500691216	0.384320926	0.14406772	0.842357969	0.072690788	2.279761932	0.046175218	0.245795063	0.24077248	0.894488698	0.627416506	0.225640433	1.553326093	0.503611419	0.314391054	0.084949853	0.330562749	0.123775597	0.365987874	0.758171753	0.334259815	0.224036821	0.262629393	0.499018224
E06000047	2010	0.457392718	0.567019868	0.575737308	0.302520779	0.159293615	0.175864317	0.609218053	1.72731684	0.270979451	0.372097668	0.237699857	0.282161218	0.370464692	0.766859493	0.723006898	0.233680372	0.827557217	0.01627188	0.093097785	0.82375108	0.904186834	0.838446101	1.118494452	0.325388622	0.461977734	0.359373529	0.135268771	0.766519694	0.068616214	2.104977835	0.04423964	0.228765355	0.217125662	0.85143602	0.601269359	0.20726995	1.492551429	0.456784297	0.28821011	0.086195488	0.299331295	0.109911543	0.322851396	0.689861008	0.329635482	0.206205308	0.23547728	0.473642422
E06000049	2010	0.481573414	0.57329147	0.589846976	0.305465257	0.173453387	0.181923129	0.638609744	1.568492023	0.274568231	0.379738307	0.232478137	0.290040667	0.394264894	0.749718118	0.733129066	0.234368666	0.839493351	0.016418512	0.095307019	0.835414293	0.916017275	0.843782951	1.117775753	0.326317361	0.474703728	0.364157262	0.141525359	0.797061019	0.071559845	2.066898559	0.043277369	0.23600531	0.219686822	0.865900585	0.587201485	0.213370622	1.633176428	0.465153161	0.292966913	0.079730522	0.293286059	0.10792723	0.348818035	0.671338835	0.325959589	0.218244877	0.252039605	0.493119362
E06000050	2010	0.472036951	0.570536533	0.582135433	0.307048061	0.166317498	0.177796531	0.624505477	1.616577881	0.273749787	0.378601676	0.231941876	0.283123896	0.384517907	0.755677902	0.731854356	0.232645475	0.835596362	0.016553457	0.093263666	0.83105231	0.909534264	0.83695532	1.112729498	0.323331072	0.46934595	0.361725483	0.137922167	0.7813365	0.068356891	2.076753424	0.043933365	0.231126887	0.21732035	0.848330667	0.590862615	0.209678803	1.612250507	0.463090596	0.289602702	0.080836218	0.291470962	0.106320943	0.336959109	0.680468948	0.330481855	0.211923642	0.246694593	0.488017859
E06000051	2010	0.497588397	0.583549347	0.600409171	0.31270267	0.177504012	0.188519044	0.65012876	1.638591823	0.281800807	0.388828565	0.241926934	0.299379099	0.398007002	0.765527456	0.747986366	0.239334566	0.860662039	0.016793472	0.095942647	0.860516298	0.933163384	0.875849882	1.149940871	0.339676853	0.48839102	0.371807046	0.14391531	0.827028208	0.071514633	2.133733549	0.044176275	0.241445492	0.227810897	0.88125568	0.600921715	0.219817214	1.65726965	0.484190264	0.302167739	0.079956646	0.30695162	0.111406585	0.362004351	0.707676054	0.328579149	0.222937775	0.259936237	0.499865943
E06000052	2010	0.487907603	0.573849065	0.599043577	0.31113455	0.174365031	0.190090647	0.637093813	1.688754626	0.285363519	0.384504162	0.249847298	0.306090644	0.3872362	0.758375565	0.735672388	0.239655672	0.861736902	0.015944595	0.093367421	0.863395304	0.933910243	0.87850416	1.153975535	0.345933061	0.486331914	0.372780466	0.141794468	0.829487802	0.071229625	2.151476598	0.043848795	0.238096495	0.227940139	0.882011069	0.599983687	0.217386693	1.562789898	0.484506553	0.302765406	0.0816699	0.313628015	0.116257037	0.358101527	0.713597912	0.323969924	0.21961575	0.256375662	0.494051543
E06000053	2010	0.489287541	0.602519626	0.626608052	0.308911242	0.177898054	0.195200283	0.667694624	1.834339517	0.270221154	0.382889889	0.235762557	0.295541119	0.416058123	0.796387347	0.747504482	0.240617545	0.802647771	0.014174303	0.092236847	0.814920288	0.926075193	0.895228716	1.167603858	0.336506967	0.475535014	0.366204025	0.15423568	0.791742132	0.0731926	2.076080775	0.043739214	0.239915016	0.214950516	0.915154361	0.600587378	0.229042204	1.619718427	0.49573641	0.301028672	0.048832572	0.348233374	0.114095113	0.358683164	0.836037428	0.29898068	0.2325719	0.263455887	0.491688565
E06000054	2010	0.480803545	0.572219639	0.588121054	0.308158539	0.170122091	0.179965961	0.635210677	1.560766292	0.275968353	0.384249111	0.230578733	0.285580826	0.390356012	0.756095555	0.737016811	0.235024444	0.83535852	0.016211696	0.095112417	0.837918327	0.91984697	0.842994087	1.115165955	0.324421898	0.472247562	0.364664815	0.141112662	0.793447218	0.06967435	2.064086005	0.043385298	0.235552374	0.21767694	0.865848921	0.590393936	0.212963731	1.625395331	0.466948858	0.292545421	0.081616472	0.292553367	0.106244233	0.342662059	0.673253801	0.328458939	0.217153963	0.249743746	0.493740018
E06000055	2010	0.456100975	0.553657645	0.576037936	0.283615997	0.177493131	0.169083318	0.636897793	1.469070947	0.260362153	0.361142383	0.216292305	0.25615434	0.386758661	0.75561165	0.68970181	0.223720267	0.766670112	0.014885959	0.10225714	0.787479604	0.892341409	0.775794457	1.057679354	0.29369835	0.442851957	0.331356835	0.14112204	0.716381677	0.081165101	1.857717704	0.042462626	0.23070789	0.202695523	0.861924022	0.559429585	0.214793649	1.437644081	0.406876307	0.284850457	0.081352719	0.265472453	0.101687137	0.33372121	0.614323232	0.30572862	0.219917466	0.241608784	0.484529392
E06000056	2010	0.482445603	0.58901188	0.597179836	0.308400605	0.174130454	0.177506109	0.648686433	1.561881313	0.272981706	0.383098368	0.225490854	0.281968792	0.403184589	0.776614599	0.746800327	0.235849741	0.84026323	0.01668736	0.100008209	0.83413922	0.926175644	0.829121679	1.119421284	0.317170846	0.473441585	0.364240599	0.144089247	0.784824783	0.073772805	2.042287599	0.044118243	0.238220634	0.21516805	0.875847805	0.596092836	0.214467349	1.669720685	0.454652005	0.292357184	0.087061029	0.283033966	0.104500788	0.343995189	0.656340171	0.335523684	0.218696952	0.25150647	0.503298346
E06000057	2010	0.480855659	0.578450927	0.595152274	0.309704439	0.168582212	0.185662122	0.632615859	1.670183358	0.280366571	0.382087397	0.246469768	0.297717834	0.385715927	0.764852804	0.735011905	0.238829585	0.857585326	0.01671027	0.094025765	0.852079767	0.926811873	0.86920451	1.146933243	0.340431189	0.48208819	0.369760809	0.140534492	0.812407668	0.069935164	2.144849524	0.044369955	0.236279062	0.225568209	0.873410432	0.602007979	0.214033153	1.584133872	0.480262672	0.298709271	0.080903592	0.309073214	0.113805865	0.348297576	0.708070167	0.327742974	0.215705162	0.251190472	0.489008917
E07000004	2010	0.485588918	0.589256393	0.599298425	0.308162858	0.183016168	0.17677877	0.661853139	1.531948645	0.272155725	0.388163183	0.222847639	0.274699916	0.41046706	0.773260896	0.749401977	0.235787231	0.837041587	0.017037453	0.102278173	0.833103818	0.930148092	0.82444799	1.109647987	0.312457813	0.469547699	0.360829435	0.146692085	0.768448262	0.076249464	2.014423511	0.045390679	0.238696334	0.213238645	0.879096445	0.593367715	0.217364845	1.696312362	0.443672344	0.292793878	0.088973195	0.279174678	0.102624293	0.345882206	0.651506759	0.334650211	0.223466429	0.25582671	0.510384873
E07000005	2010	0.523746584	0.590471185	0.617442522	0.310557108	0.201040271	0.190344481	0.694422641	1.345429501	0.275422663	0.393625156	0.22483104	0.289627267	0.431374765	0.750033308	0.763571071	0.242729529	0.847378433	0.018018489	0.10214842	0.842235898	0.937803792	0.84711916	1.117568298	0.322434236	0.488640459	0.36592593	0.154398447	0.803623916	0.080603577	2.01288982	0.04418136	0.246776612	0.221061305	0.891998935	0.57246908	0.225914062	1.81308567	0.457920288	0.300825141	0.073980208	0.288079917	0.105049928	0.387082742	0.649558246	0.325272468	0.238148957	0.27394622	0.516700351
E07000006	2010	0.505116105	0.590916085	0.612656383	0.303244556	0.19773673	0.188011528	0.680449662	1.464161519	0.274488077	0.380535108	0.229254691	0.289415225	0.420454604	0.76024152	0.749033401	0.239359321	0.837043673	0.016808106	0.10501052	0.840324788	0.936554822	0.836897581	1.122936905	0.323394316	0.481255301	0.355632152	0.151747409	0.792013686	0.084077791	1.995019783	0.04386069	0.244762317	0.221754598	0.89182675	0.572899592	0.226664204	1.632981514	0.443562422	0.301511131	0.080762658	0.284226139	0.110671033	0.382818698	0.643029161	0.316781043	0.2344546	0.271117308	0.509065218
E07000007	2010	0.472592114	0.567769187	0.589771391	0.291022345	0.18859288	0.173364345	0.6562147	1.471123273	0.258672174	0.36877843	0.21539703	0.263658878	0.401116715	0.754492908	0.711551344	0.227149257	0.787671646	0.01649224	0.102619355	0.795763716	0.903119847	0.783823693	1.066846393	0.29714677	0.455020041	0.337844177	0.147021774	0.73101988	0.081726249	1.887474671	0.043764403	0.2332406	0.205606274	0.86368558	0.561471945	0.215858269	1.613947663	0.410276012	0.285265982	0.090477686	0.26519205	0.102768327	0.357919127	0.611373035	0.312137795	0.221887399	0.254972672	0.49789597
E07000008	2010	0.440819935	0.564292994	0.568307352	0.285991853	0.175774853	0.157930468	0.634322322	1.726695243	0.249615487	0.353234628	0.203448871	0.246952994	0.397889533	0.762898872	0.695788304	0.216260997	0.793462999	0.015504571	0.099873141	0.764409014	0.87476552	0.737141305	1.038164474	0.277913097	0.434107444	0.326932209	0.135718614	0.684106932	0.081349272	1.862708182	0.043871379	0.218396091	0.200762893	0.807034659	0.570108357	0.205920508	1.524006879	0.380652159	0.277627621	0.08726207	0.242660844	0.096423365	0.325717242	0.63087158	0.324164903	0.205940025	0.240575752	0.49527543
E07000009	2010	0.483017342	0.583878106	0.594556218	0.313668355	0.173516295	0.178273359	0.647382588	1.572670058	0.27457572	0.392371246	0.229077691	0.279481355	0.402375027	0.771662585	0.747223113	0.236333355	0.840401392	0.016738187	0.099289798	0.842988494	0.93121278	0.84022668	1.12231653	0.321914217	0.475865248	0.366616016	0.14124006	0.785751327	0.070911347	2.070365447	0.043798876	0.238917192	0.217223885	0.876688418	0.600086732	0.21674691	1.651146167	0.462459833	0.295740434	0.088054156	0.28629181	0.104193967	0.343028949	0.667009763	0.335198443	0.220713534	0.254151278	0.502717666
E07000010	2010	0.479698566	0.576382361	0.590716131	0.311107289	0.167403588	0.183383426	0.62719294	1.707465788	0.279327319	0.383793347	0.243918413	0.291393582	0.381910182	0.767560841	0.740221395	0.239431962	0.843630998	0.01663628	0.09429378	0.846079758	0.924404871	0.863441459	1.141876752	0.337026566	0.476986189	0.367177327	0.138997193	0.794402544	0.07008496	2.143714297	0.044526691	0.236539213	0.223669256	0.868622425	0.607746866	0.214814679	1.537551437	0.473749794	0.296105839	0.083669321	0.30911885	0.112773794	0.341005028	0.703642442	0.330976673	0.215329379	0.248049845	0.483933262
E07000011	2010	0.482847112	0.588261869	0.597907066	0.307932083	0.174466268	0.178643938	0.646759543	1.563522369	0.277672715	0.382504083	0.227120415	0.287308568	0.405566633	0.764734852	0.745660383	0.237873843	0.847330162	0.016748165	0.097431707	0.836544715	0.924981783	0.83422083	1.120794588	0.320232022	0.475441802	0.368021803	0.143918739	0.797221916	0.071811658	2.047286035	0.043586852	0.237143768	0.21728779	0.870498759	0.593114894	0.212537659	1.693499595	0.465018879	0.291733912	0.081386446	0.285343787	0.105530658	0.347364365	0.662124616	0.336550691	0.21858489	0.255647752	0.504517356
E07000012	2010	0.503522122	0.58723091	0.603223875	0.310762845	0.182436455	0.181356027	0.665705707	1.445954109	0.27543152	0.387715266	0.221926158	0.28481539	0.416758054	0.754873015	0.756213966	0.237096783	0.850637224	0.01766652	0.098269231	0.836792787	0.928969869	0.838698845	1.116146001	0.316945476	0.477220577	0.368357615	0.14912167	0.798178111	0.073248432	2.027484935	0.044724437	0.241346226	0.21657492	0.872054119	0.585291798	0.216046607	1.802619843	0.461220241	0.292341892	0.081609484	0.28367278	0.102035067	0.35945128	0.645678859	0.334855946	0.224724357	0.262639775	0.515752229
E07000026	2010	0.485557315	0.579893873	0.593214621	0.313235162	0.169840345	0.186770422	0.640685696	1.591834945	0.28095547	0.387359576	0.240049835	0.294520722	0.393566817	0.754171411	0.750170658	0.235877691	0.853720031	0.017175881	0.092051527	0.854386171	0.927780024	0.868739062	1.139380651	0.335455399	0.4850953	0.369757612	0.140910609	0.819600102	0.068710707	2.131867404	0.043248383	0.238415171	0.227963378	0.868513455	0.59727101	0.215850465	1.6668733	0.486972555	0.297530676	0.075299314	0.306544121	0.108836407	0.350916523	0.712661233	0.333129543	0.220085441	0.25458232	0.496902032
E07000027	2010	0.452147342	0.558038423	0.561565413	0.29985006	0.154951144	0.175319929	0.591786258	1.717947582	0.273340753	0.372087511	0.238383795	0.275720977	0.359850764	0.764466364	0.719978133	0.228557934	0.82372766	0.016239956	0.089818506	0.824480787	0.893875413	0.837392616	1.114615374	0.324459554	0.456311856	0.353497502	0.134222162	0.766573867	0.065637339	2.103265603	0.044789748	0.225042234	0.213911993	0.834228657	0.596960079	0.20325703	1.467541111	0.456964809	0.285571601	0.084123855	0.293037145	0.10851996	0.31537347	0.705913831	0.325374121	0.200150833	0.230846464	0.468636089
E07000028	2010	0.462680103	0.562886229	0.578986094	0.300532101	0.164660147	0.17696253	0.616914293	1.713053896	0.272351268	0.372316544	0.235716635	0.285501614	0.376895882	0.76015779	0.717954418	0.231028311	0.827551069	0.014982472	0.093738117	0.828652667	0.904424134	0.830699426	1.11577076	0.323499314	0.4660484	0.359697986	0.137501467	0.776951587	0.069802648	2.068665776	0.043270441	0.22920485	0.215965556	0.863381851	0.591499802	0.209340683	1.498161149	0.453274034	0.290279333	0.084743609	0.294993782	0.109102484	0.329048535	0.687114312	0.325239951	0.210306179	0.240389202	0.482176106
E07000029	2010	0.477174479	0.581077973	0.593625835	0.313792009	0.166879454	0.1805789	0.630588063	1.652148884	0.274675505	0.377844783	0.239613749	0.286869743	0.38674162	0.77483717	0.741422567	0.236068743	0.856128222	0.017833527	0.097225927	0.836760865	0.910783656	0.855083557	1.138807301	0.330989845	0.480029772	0.359808338	0.136652193	0.793474385	0.071289106	2.137697646	0.04445551	0.234795791	0.223730105	0.845147382	0.602164875	0.211945177	1.649360944	0.47031302	0.290786299	0.089844863	0.302121421	0.110231353	0.346096928	0.695315414	0.330294011	0.211487758	0.24934129	0.48819907
E07000030	2010	0.495594833	0.569633891	0.600611426	0.306745459	0.179719456	0.192136258	0.642394871	1.598886435	0.287399125	0.386746191	0.246747145	0.308378103	0.393514606	0.744307086	0.729020637	0.239660123	0.863504018	0.016212691	0.091776398	0.866953919	0.932759833	0.890352643	1.154873897	0.34551719	0.486218267	0.377532428	0.142168691	0.842804867	0.069904268	2.147034055	0.042648621	0.238824367	0.22903303	0.886366876	0.595814186	0.216720491	1.648129005	0.498432618	0.301881717	0.068468861	0.313849582	0.11467455	0.359370074	0.709926992	0.322940985	0.223037913	0.260745958	0.501802097
E07000031	2010	0.515963418	0.59373769	0.620034768	0.321603155	0.18414269	0.198457299	0.667394291	1.629219675	0.287234386	0.398219476	0.254129589	0.314124862	0.407208826	0.755350785	0.75438377	0.246799911	0.886601438	0.017642511	0.095848421	0.8815255	0.949450702	0.912181597	1.18055812	0.358121291	0.505928924	0.384369874	0.14756456	0.857066532	0.072369932	2.218178626	0.043585971	0.247191507	0.240712152	0.895054526	0.603385392	0.225564233	1.71285144	0.510450212	0.311737955	0.072464539	0.326150241	0.117490214	0.382200038	0.734703075	0.330001878	0.231086258	0.27205846	0.506048462
E07000032	2010	0.479245461	0.575150178	0.593123615	0.305903167	0.172663422	0.181396774	0.637159262	1.634842631	0.277483717	0.38160479	0.234731399	0.291872148	0.394250815	0.756996595	0.733354125	0.234528544	0.847963818	0.016476119	0.094827073	0.845166435	0.918709029	0.85121207	1.127357388	0.329321687	0.479463692	0.368024781	0.142704669	0.808107735	0.070253516	2.100945335	0.043239913	0.235338792	0.220077237	0.875731267	0.595829275	0.212641486	1.65371095	0.474260018	0.294351744	0.076492059	0.298621307	0.107580075	0.345790997	0.699643903	0.329889085	0.218502861	0.25110864	0.492541092
E07000033	2010	0.461709249	0.567594025	0.576630175	0.306416531	0.162656711	0.175495366	0.608419098	1.746775801	0.271332866	0.378335672	0.232531949	0.284022476	0.371434794	0.766302923	0.727833349	0.232136512	0.829180347	0.016272616	0.091902369	0.824182698	0.906268249	0.839915974	1.114804986	0.324790649	0.461356448	0.357693457	0.137416217	0.771843141	0.067698126	2.101370627	0.044919248	0.229301897	0.217127045	0.850669779	0.60034244	0.207890634	1.523861203	0.460953379	0.285765006	0.087485103	0.297691914	0.108334612	0.325415946	0.694441939	0.332023957	0.208494724	0.239122356	0.482142181
E07000034	2010	0.462612382	0.573299535	0.580787341	0.306735022	0.159819122	0.176693878	0.614150528	1.718293682	0.274261268	0.378688504	0.23852079	0.280632303	0.375214214	0.771946307	0.735713994	0.233396173	0.831620641	0.016223061	0.093989957	0.83384097	0.912672705	0.843719079	1.127026066	0.32702322	0.468132437	0.362096996	0.138121831	0.77603649	0.068082989	2.122073875	0.044620697	0.231039692	0.21764652	0.85462892	0.605824143	0.209352509	1.527000867	0.462418532	0.292507886	0.086006802	0.297750367	0.108653971	0.324399897	0.70530323	0.335607742	0.208288865	0.238635293	0.478068966
E07000035	2010	0.516416848	0.598450966	0.616111471	0.319596777	0.179921085	0.195344966	0.669068694	1.59692958	0.284282951	0.395131157	0.248364463	0.311016332	0.410361642	0.76049458	0.764645604	0.244189951	0.883983214	0.018465993	0.097233247	0.872049264	0.939012296	0.900308627	1.169873802	0.350974079	0.505456173	0.380716789	0.148741917	0.849943457	0.072463354	2.194656844	0.044247917	0.247368192	0.236432831	0.889231396	0.601886828	0.224358306	1.779654057	0.501462591	0.307521918	0.074987149	0.317941893	0.114407849	0.381037503	0.725289743	0.331283233	0.229842635	0.269725917	0.499646747
E07000036	2010	0.466913042	0.572196539	0.580103952	0.305162203	0.162762563	0.176946481	0.617786497	1.642546391	0.276780015	0.377980154	0.23205342	0.284019268	0.382553081	0.765097458	0.735646176	0.232763995	0.833169284	0.015961542	0.09159561	0.83375835	0.914730816	0.83767738	1.122110344	0.322990823	0.468368736	0.363547504	0.138401952	0.782217655	0.067871077	2.084758168	0.044043684	0.231442186	0.215924484	0.862176017	0.599786491	0.208018033	1.583178944	0.465588109	0.289225515	0.081340721	0.292062901	0.106786021	0.325808019	0.689252072	0.335327132	0.209970326	0.241931368	0.48873796
E07000037	2010	0.473247604	0.583073347	0.588508377	0.30574971	0.165993618	0.179413753	0.630332331	1.661292604	0.276450745	0.381908134	0.23361831	0.291128341	0.388411754	0.768465583	0.74269911	0.236488099	0.843576504	0.016505178	0.095623638	0.839254031	0.920183156	0.845490601	1.12841335	0.326850256	0.475297287	0.368079362	0.140823014	0.793368325	0.069051996	2.10286293	0.044072476	0.234631758	0.220572749	0.867489252	0.602071766	0.210827986	1.623572889	0.470609195	0.293322153	0.08218833	0.294967801	0.108385288	0.335948007	0.678708703	0.33678537	0.21314212	0.245754233	0.493474812
E07000038	2010	0.482590482	0.578311462	0.597624331	0.311396011	0.166615513	0.186490329	0.63191699	1.716210549	0.279880538	0.383764914	0.25033751	0.296935174	0.382546937	0.767746435	0.740681096	0.239734147	0.858650622	0.017015156	0.094549125	0.852615624	0.930073429	0.881659932	1.158561793	0.344697254	0.483302795	0.371165862	0.141748148	0.812589335	0.070356697	2.181433455	0.044376041	0.238757858	0.227600488	0.878432322	0.611230798	0.214996089	1.571549429	0.481930259	0.300740506	0.082380132	0.316278478	0.115517196	0.346297994	0.72336465	0.327682107	0.216000709	0.25024024	0.479494742
E07000039	2010	0.471565817	0.571901403	0.582667662	0.296689113	0.170060111	0.174107957	0.634790648	1.525356984	0.267638048	0.374153453	0.218689114	0.276775845	0.396634145	0.749974654	0.721897109	0.228773594	0.819384342	0.016237871	0.096873631	0.810579308	0.900395252	0.813457462	1.092380765	0.309899285	0.461259298	0.356897422	0.141652488	0.775409486	0.070355116	1.99093968	0.04257146	0.234615952	0.211195558	0.868657885	0.581015739	0.207346898	1.638784347	0.449605733	0.284532457	0.081648996	0.279282179	0.101310801	0.331655902	0.646762184	0.330042938	0.214742853	0.243719745	0.4910086
E07000040	2010	0.5266286	0.585388896	0.622759469	0.326980165	0.186800031	0.204940349	0.671620525	1.582617484	0.290738653	0.401373061	0.261376674	0.318702665	0.406487167	0.743747543	0.760375027	0.248424275	0.883869431	0.01756318	0.094083009	0.889473585	0.9544015	0.925807948	1.184701866	0.367369094	0.510786887	0.382547045	0.147564287	0.865461808	0.074316934	2.227939019	0.043180258	0.249396246	0.244692522	0.89298038	0.59852742	0.231027752	1.659393586	0.510843363	0.31720139	0.074356367	0.334523542	0.121433135	0.39726353	0.742844039	0.319041193	0.236057793	0.27700501	0.499245674
E07000041	2010	0.440823492	0.547766617	0.5519423	0.289216469	0.156491901	0.163283027	0.594958843	1.706332688	0.258203852	0.357573977	0.214238843	0.259941994	0.36845266	0.751524116	0.707942272	0.215905621	0.785430675	0.014675758	0.092272514	0.785035163	0.866724309	0.775789244	1.059698935	0.2954465	0.44128313	0.344237234	0.131916793	0.718740497	0.066589904	1.961726637	0.043982198	0.219432174	0.202428586	0.821747012	0.573559467	0.201283381	1.453729077	0.421506544	0.275892752	0.083899892	0.269587042	0.098841974	0.30763673	0.645312479	0.325482521	0.199793477	0.230486756	0.473033023
E07000042	2010	0.482909626	0.568479996	0.587364718	0.310026127	0.166561636	0.185163689	0.6223775	1.645511849	0.283812557	0.383097012	0.245703415	0.297383706	0.378816771	0.7504375	0.735948889	0.237618583	0.85069201	0.015636256	0.091365804	0.850612768	0.923833486	0.862252935	1.139752485	0.33920654	0.477300789	0.374271888	0.139107155	0.811760465	0.067323552	2.13280005	0.044243907	0.234893954	0.223033256	0.864991211	0.598297533	0.213080752	1.565460984	0.478439723	0.295968452	0.082091432	0.31065036	0.112835341	0.341286025	0.697021887	0.325369702	0.213374694	0.250365797	0.485358095
E07000043	2010	0.494442019	0.562910029	0.593318048	0.307367352	0.179154146	0.190185152	0.639193823	1.570042749	0.286880801	0.382599352	0.243770344	0.299203858	0.389909165	0.744961406	0.729063529	0.236217938	0.848302914	0.015839478	0.092747553	0.858225698	0.926537586	0.871474933	1.139343682	0.340772674	0.482708031	0.36850992	0.143230656	0.826178479	0.071618825	2.093731742	0.043043811	0.237873957	0.223858454	0.878126151	0.587634222	0.217749428	1.58163154	0.485081919	0.301172338	0.073323416	0.307451985	0.112621482	0.358010056	0.703638969	0.317681918	0.222091563	0.258578738	0.495262881
E07000044	2010	0.523913607	0.596489309	0.62532394	0.320962855	0.186444986	0.201163315	0.678149412	1.612931147	0.293480503	0.397995323	0.257750793	0.318462287	0.412852996	0.76043043	0.764025485	0.248160567	0.892200545	0.016750119	0.096373033	0.896953405	0.959817502	0.919233231	1.188643297	0.359228841	0.511717231	0.389171473	0.150532531	0.868210477	0.07471676	2.211787336	0.044505533	0.249429545	0.239066632	0.905938715	0.606864064	0.228953598	1.709708811	0.510225303	0.315355769	0.069812849	0.328510706	0.118370403	0.385875294	0.73243065	0.329947422	0.234725941	0.272105077	0.509795409
E07000045	2010	0.507267208	0.586062971	0.609357572	0.318831382	0.178755763	0.194263383	0.655779165	1.635786623	0.287657767	0.39495466	0.252629735	0.304968115	0.397272942	0.764763276	0.758081718	0.245416073	0.874659433	0.017103887	0.094924162	0.880415493	0.950376779	0.904469473	1.171302272	0.351553183	0.496971781	0.380996049	0.144461746	0.835772622	0.071210328	2.197549846	0.044988541	0.244526218	0.234035464	0.8848153	0.610738301	0.224068648	1.631466778	0.498485788	0.308968478	0.076526131	0.322907453	0.115247829	0.365936403	0.724863324	0.330440952	0.227097798	0.261985551	0.502432399
E07000046	2010	0.497052798	0.573431721	0.601420028	0.313813704	0.177102011	0.195876396	0.638057116	1.697824543	0.291307374	0.388027212	0.257941389	0.314814486	0.386995741	0.745691764	0.735782938	0.24090297	0.874883888	0.016689455	0.091369052	0.871139814	0.935803146	0.898757102	1.167808805	0.357650886	0.49284065	0.376161898	0.141659341	0.852263919	0.070566984	2.190126574	0.043859155	0.240852603	0.234197444	0.889715498	0.597729093	0.218713906	1.580159447	0.501966947	0.306441432	0.077850957	0.324527884	0.120126395	0.36834997	0.736316211	0.318709724	0.222509619	0.263608778	0.494057874
E07000047	2010	0.502942112	0.582292706	0.611557551	0.318205784	0.177830443	0.197224472	0.65260266	1.651785715	0.291690657	0.392096608	0.256676004	0.317768368	0.396997185	0.754756698	0.746441466	0.246979999	0.878670825	0.016853592	0.091979274	0.880085596	0.950623009	0.902613852	1.171944263	0.355625339	0.495392943	0.384513562	0.145409465	0.847214348	0.072590362	2.188160684	0.04460634	0.241672217	0.234320004	0.88690576	0.602255274	0.221715326	1.629523169	0.502224793	0.307982334	0.072685916	0.329607513	0.119514773	0.373402105	0.729786452	0.322318585	0.225930482	0.267194404	0.500390324
E07000048	2010	0.528845326	0.576734703	0.610759936	0.324476122	0.184780661	0.202850011	0.665528226	1.535101595	0.287529197	0.393754286	0.253894688	0.312110735	0.404372819	0.726124894	0.758760958	0.24785031	0.868441736	0.017174921	0.093079592	0.875886852	0.933680812	0.904826536	1.164218842	0.357768438	0.509003027	0.377831752	0.146976221	0.851835761	0.071212966	2.191364328	0.041549707	0.24710615	0.241410241	0.870055379	0.586620088	0.229398619	1.669224975	0.49866896	0.313016825	0.072539054	0.329913401	0.117243275	0.398257463	0.734035177	0.311977164	0.23329313	0.274144271	0.48758952
E07000049	2010	0.532680027	0.585624563	0.622293469	0.323054299	0.187088868	0.203462517	0.674735171	1.531371331	0.288562497	0.400565473	0.256482178	0.316731221	0.410394245	0.737985043	0.765236985	0.245794902	0.877252698	0.017557942	0.094296013	0.884725204	0.948299352	0.917789741	1.175044284	0.364385807	0.514445508	0.381469826	0.149473513	0.870758924	0.072167052	2.198461147	0.04229085	0.252185398	0.242552604	0.895035764	0.595393598	0.230240099	1.695532052	0.511310584	0.316754066	0.071476787	0.332211607	0.118867204	0.399088016	0.731935787	0.318113015	0.237144183	0.280976529	0.495504609
E07000050	2010	0.504006946	0.582508957	0.606400559	0.317274817	0.178903692	0.192790926	0.651166018	1.652618468	0.285197784	0.390379619	0.246085365	0.309462437	0.398314601	0.755392697	0.74459436	0.24464338	0.869818714	0.016403445	0.093921302	0.865413347	0.938957451	0.888480328	1.152763278	0.34752122	0.494222835	0.378991094	0.142468457	0.838410868	0.070431789	2.151962824	0.043398333	0.243022242	0.232937961	0.888063659	0.60174507	0.221496717	1.64919675	0.495776572	0.304677511	0.082629643	0.316150066	0.114929195	0.368752538	0.697602418	0.3260473	0.225940119	0.263919023	0.503956162
E07000051	2010	0.512611842	0.578488146	0.609216157	0.31688813	0.179972602	0.194990108	0.658021274	1.599985911	0.281786231	0.390108328	0.248984978	0.308685295	0.400889154	0.74103342	0.746478341	0.240137372	0.862795169	0.017011537	0.093696573	0.866773045	0.928476306	0.891417358	1.156382014	0.349951162	0.502548041	0.3782906	0.146577093	0.850004967	0.070464201	2.168693741	0.042641016	0.24488801	0.234733457	0.888021034	0.594665146	0.223291209	1.681055076	0.49980394	0.308227804	0.073800037	0.32311241	0.114241164	0.379919981	0.714851856	0.321881148	0.228326681	0.265223293	0.492343587
E07000052	2010	0.529053753	0.591052695	0.62016484	0.323652813	0.1854356	0.201987137	0.672663999	1.597855458	0.289940416	0.398847081	0.258368372	0.315343013	0.407098731	0.750474534	0.760495739	0.249454019	0.888135884	0.017770185	0.095630401	0.886958613	0.950980414	0.924532704	1.185584671	0.362816859	0.510240491	0.385429454	0.14797824	0.865199241	0.073068916	2.2274702	0.044019685	0.249874562	0.242999178	0.887996399	0.604245122	0.230262221	1.682270137	0.513842599	0.315266958	0.071548646	0.334064045	0.119635631	0.389947562	0.741779666	0.323914474	0.234276127	0.274732422	0.4986639
E07000053	2010	0.471428082	0.561887037	0.57973826	0.305365191	0.162278295	0.184552726	0.613589917	1.741609198	0.279614852	0.373422197	0.247084333	0.292114621	0.370172624	0.754660955	0.723385807	0.234941397	0.846462195	0.016243853	0.091155672	0.843855254	0.909831856	0.86434806	1.137367161	0.337079238	0.471404334	0.363704572	0.139345616	0.792611377	0.068372845	2.140273353	0.044497251	0.231736216	0.222477502	0.853935918	0.599848432	0.211251656	1.486382706	0.469749995	0.29615086	0.079434434	0.31321506	0.113293274	0.339157244	0.737761092	0.317877641	0.211803494	0.242424045	0.471594432
E07000061	2010	0.500014912	0.582978992	0.605183046	0.320997514	0.183308553	0.190528589	0.658504373	1.596254187	0.285466026	0.394050098	0.239087114	0.293632181	0.40446602	0.762999166	0.755375845	0.238663584	0.854296172	0.016852883	0.096257684	0.86274908	0.937428709	0.870385947	1.146576607	0.336324784	0.494590667	0.366145866	0.146103988	0.81662557	0.072700749	2.125923408	0.043396697	0.242687897	0.230274575	0.877520808	0.592646877	0.224170306	1.649153934	0.477937005	0.305707725	0.080108432	0.30083029	0.110536964	0.368300877	0.720602844	0.329649385	0.228513018	0.26445698	0.510821138
E07000062	2010	0.45704774	0.572423331	0.584562407	0.304874723	0.165797353	0.177697672	0.621839689	1.749872488	0.28092682	0.377400001	0.23666335	0.289289018	0.381656855	0.779984832	0.727744449	0.235846319	0.83247368	0.015020689	0.096268004	0.836879011	0.919518404	0.835902435	1.127091617	0.322672563	0.468696517	0.365671947	0.137811559	0.778177968	0.071266906	2.105041438	0.044201222	0.230257166	0.218403208	0.880275094	0.60415923	0.209783301	1.503541732	0.456060299	0.292899608	0.088146219	0.294620717	0.109630982	0.325042721	0.701048321	0.335868933	0.21255409	0.23748679	0.492377468
E07000063	2010	0.52322825	0.60030454	0.624001834	0.325359482	0.18713736	0.19803802	0.679506535	1.605059031	0.293983378	0.401814728	0.250211634	0.311826128	0.417630504	0.77109455	0.775349167	0.248324063	0.889518217	0.017436869	0.099037674	0.887236487	0.961245766	0.90184579	1.183496962	0.351658115	0.509103429	0.385502253	0.149880678	0.859603614	0.074241161	2.187591389	0.044758812	0.250602526	0.238298953	0.903853617	0.608233401	0.229207457	1.718836091	0.499300375	0.312875553	0.080084429	0.318479151	0.116508043	0.386700232	0.716996515	0.335069859	0.233768055	0.273531317	0.518670659
E07000064	2010	0.532240019	0.588466925	0.628742093	0.32486701	0.193243451	0.208069277	0.685487005	1.568359081	0.294218721	0.403061713	0.265106357	0.31656399	0.411625959	0.746665572	0.764577566	0.246730574	0.879107915	0.018011382	0.098190154	0.895916329	0.95618025	0.930943095	1.195793634	0.370093316	0.518100438	0.376029489	0.151272915	0.867722075	0.07830201	2.222669975	0.043210218	0.253829444	0.246277735	0.908674396	0.59429641	0.237548168	1.649503808	0.50692049	0.322852058	0.072228184	0.332952423	0.123065884	0.406013858	0.759974836	0.311825718	0.242203096	0.282137213	0.496864412
E07000065	2010	0.530887664	0.603424719	0.627913258	0.32535924	0.189097241	0.200280231	0.679784203	1.572307195	0.296066268	0.400602324	0.254085834	0.31744978	0.418687897	0.769878626	0.775821347	0.251849911	0.898190899	0.017485116	0.097718949	0.894071888	0.966911733	0.909337422	1.188305025	0.35705901	0.511263395	0.388469521	0.151950997	0.867113939	0.075383796	2.197170201	0.04546766	0.25044536	0.238067774	0.901363749	0.606867079	0.228929819	1.762448547	0.503766303	0.313188772	0.07790232	0.319950681	0.117748934	0.391419502	0.71342476	0.332229167	0.233856931	0.279433022	0.518412791
E07000066	2010	0.460943385	0.570694196	0.58077492	0.300393276	0.168292465	0.171886705	0.626062175	1.606491956	0.270013378	0.37484625	0.227577584	0.269635995	0.383298394	0.775076307	0.721612641	0.231900463	0.811831962	0.015984241	0.09919418	0.81179017	0.91239688	0.807405493	1.099709281	0.312500311	0.455241083	0.350247567	0.137858561	0.746869005	0.073765351	2.002650505	0.044377073	0.231106448	0.211555916	0.854629125	0.590422139	0.211397303	1.499218767	0.432956976	0.287004934	0.095329791	0.278044505	0.106147596	0.329695754	0.646445615	0.328203862	0.211107723	0.240149236	0.491115248
E07000067	2010	0.479359264	0.587953394	0.59504585	0.310499914	0.169646977	0.178340052	0.642528248	1.623841506	0.277083045	0.385032722	0.230471402	0.285712681	0.397963844	0.780177608	0.746440082	0.235660624	0.843540845	0.016833539	0.098915765	0.836984853	0.928251271	0.836886927	1.127634481	0.320774997	0.474659211	0.367533894	0.142112269	0.789416428	0.070966315	2.069289781	0.044087292	0.23823687	0.21943429	0.875412139	0.601961268	0.214412856	1.645326295	0.460191934	0.294591519	0.092617061	0.287332594	0.106818959	0.342594676	0.659297583	0.338727988	0.217027577	0.249498778	0.505823451
E07000068	2010	0.521216409	0.602087399	0.619159156	0.320283797	0.191158317	0.186770235	0.691854875	1.418435109	0.275702701	0.394709638	0.222703708	0.288528564	0.435467901	0.761403005	0.773448821	0.241257137	0.859144353	0.018940778	0.102527569	0.843376391	0.937717246	0.847351082	1.125025142	0.320719494	0.494752926	0.370193428	0.15212961	0.802144966	0.077181872	2.052109213	0.043689381	0.246158655	0.224227606	0.880976723	0.581593424	0.224301175	1.862133588	0.466520078	0.299783146	0.074567987	0.284646998	0.104043153	0.378611762	0.650675225	0.340831419	0.233840074	0.274085127	0.523937554
E07000069	2010	0.509948547	0.592222569	0.613725678	0.314297086	0.18351554	0.192875532	0.663274078	1.620193472	0.28762919	0.390044	0.245468408	0.307953035	0.408324105	0.768292834	0.756677429	0.243046425	0.868231771	0.016893963	0.09647776	0.868872674	0.945270469	0.882152706	1.162341845	0.345404721	0.497558432	0.378467009	0.146521886	0.842707688	0.073786173	2.135666946	0.043911793	0.245164775	0.231600894	0.898302045	0.603277055	0.223692593	1.667439448	0.492403949	0.306480853	0.075575006	0.312510122	0.114394957	0.370977214	0.706473209	0.32983225	0.228487588	0.267352129	0.505343146
E07000070	2010	0.48497195	0.579662442	0.595174962	0.304860063	0.177030259	0.178355058	0.649631538	1.514563611	0.275695213	0.379837787	0.22716928	0.278095197	0.403891909	0.761789297	0.736746832	0.234865266	0.834813686	0.01627581	0.097824575	0.832242135	0.92371257	0.826295963	1.110696259	0.317736614	0.471035116	0.361714206	0.144743685	0.777379635	0.075678376	2.016082129	0.045018643	0.235839669	0.214591517	0.865755892	0.586071802	0.214667909	1.660194661	0.449096615	0.292217588	0.079520098	0.281761636	0.104415131	0.34577057	0.658445225	0.331426209	0.218469108	0.255228158	0.501744587
E07000071	2010	0.459380965	0.56224844	0.574633201	0.294556648	0.169237484	0.171688362	0.624879459	1.581948147	0.266406571	0.370308077	0.223193791	0.267716863	0.383493434	0.76144419	0.71302057	0.227809148	0.803666375	0.01568894	0.097491554	0.808139924	0.900153216	0.80502545	1.086436038	0.308329933	0.452672442	0.346841808	0.137690161	0.750398685	0.073257291	1.973785228	0.043530092	0.229939372	0.209189492	0.850139161	0.580488691	0.210105508	1.507410337	0.43305429	0.285819085	0.085946428	0.275552751	0.10352913	0.330436887	0.648532487	0.322555467	0.211782628	0.241994561	0.485563193
E07000072	2010	0.486920261	0.586534952	0.602490589	0.305126268	0.182278733	0.181492602	0.654851695	1.556592827	0.272017665	0.379012818	0.229696556	0.284174868	0.404660714	0.767432309	0.736517422	0.238380232	0.834914194	0.016968921	0.101576161	0.833989939	0.925935161	0.830582589	1.117542012	0.321089352	0.476840123	0.356569105	0.146653826	0.781169686	0.078091402	2.032877496	0.043987475	0.238316227	0.219267754	0.873250113	0.58609684	0.218379887	1.620802816	0.44879247	0.295658136	0.085153774	0.284598954	0.109313554	0.36246829	0.65729717	0.322839242	0.222810141	0.258915702	0.501676935
E07000073	2010	0.442585367	0.551307742	0.562263528	0.297209891	0.154337006	0.166847155	0.595852459	1.645246637	0.271783045	0.370954638	0.227438611	0.259973466	0.363921529	0.772818231	0.713504528	0.227127398	0.796170108	0.014229412	0.093634025	0.810339136	0.902898414	0.794854154	1.090323714	0.307195267	0.444228437	0.348429257	0.132583114	0.7287227	0.070194982	2.001291729	0.044886861	0.224268307	0.203289808	0.845488444	0.594454542	0.204669682	1.390109089	0.425651228	0.281742424	0.094709807	0.274637301	0.103022847	0.298460238	0.649198095	0.329542018	0.201586347	0.225878991	0.477284097
E07000074	2010	0.517440676	0.601379563	0.618885159	0.319093099	0.184395795	0.194262144	0.67503729	1.510450592	0.288584875	0.396528118	0.243348223	0.307766775	0.419736697	0.765025111	0.769566687	0.246256644	0.885134523	0.018575478	0.097383476	0.874743884	0.951297667	0.890943821	1.168518816	0.344967601	0.50169225	0.382792686	0.151042449	0.851237475	0.072431611	2.158705883	0.044439638	0.246564068	0.233159976	0.893543528	0.601170246	0.222419626	1.850421529	0.499007105	0.306339872	0.07360392	0.307632522	0.111171464	0.380208228	0.714953228	0.337611175	0.229509299	0.273193553	0.515570751
E07000075	2010	0.512866477	0.589096901	0.609702633	0.316447196	0.180975732	0.188974264	0.663240166	1.521387238	0.283212416	0.395729355	0.236980158	0.298295795	0.410836644	0.76071949	0.765108134	0.238475714	0.861208046	0.017005713	0.097430232	0.865338287	0.939750527	0.87087082	1.147171979	0.337942409	0.496229268	0.37540804	0.148915443	0.839180589	0.07133175	2.114772639	0.042997952	0.245401405	0.22484474	0.897407651	0.597230921	0.220489247	1.757439256	0.488837783	0.304440475	0.077765359	0.300004801	0.108294739	0.363988756	0.689196389	0.334048291	0.226240945	0.26722047	0.507321364
E07000076	2010	0.511700913	0.58528959	0.60781792	0.326847087	0.176484831	0.19966677	0.649889238	1.664609002	0.292148273	0.396134576	0.263495412	0.309026459	0.391641876	0.755242395	0.758912888	0.245856559	0.876551161	0.017626719	0.092980704	0.880186061	0.942546735	0.91103739	1.183521431	0.3634765	0.505333993	0.377303838	0.144388124	0.846588706	0.070934467	2.242882937	0.044155761	0.244166771	0.241829218	0.872172232	0.605430978	0.225592021	1.59938466	0.502057001	0.312727686	0.080191973	0.331913591	0.120656138	0.378241747	0.755923569	0.320623686	0.225884958	0.267945905	0.485933917
E07000077	2010	0.49193316	0.583413158	0.597218194	0.308041562	0.175085249	0.183187365	0.648648686	1.480886734	0.281340829	0.38765336	0.231787625	0.288777913	0.402847297	0.768307645	0.748758761	0.238107604	0.842780626	0.016526629	0.097417219	0.84598074	0.934566899	0.844553266	1.125265116	0.325172529	0.477773306	0.368318997	0.144746912	0.795341422	0.074844526	2.056381045	0.044174513	0.240308405	0.218245103	0.881775643	0.592927738	0.216455546	1.663594419	0.462987407	0.295186634	0.081230815	0.288748331	0.107575875	0.34836369	0.652682793	0.331789257	0.22158601	0.255427687	0.505675428
E07000078	2010	0.450255041	0.555734213	0.564198944	0.294181009	0.160273134	0.167672039	0.609604516	1.588058563	0.262623788	0.362945137	0.219100026	0.262701051	0.379049257	0.741748906	0.712259205	0.224005012	0.800273438	0.015607266	0.092635646	0.795185895	0.878824653	0.791669344	1.072365923	0.301982539	0.451368338	0.343716648	0.135126543	0.731320003	0.069337392	1.988223596	0.043781965	0.223361561	0.208235799	0.820267305	0.572678996	0.203016174	1.550085373	0.428400447	0.28008399	0.07676475	0.26881098	0.101085487	0.319899613	0.656205468	0.327193555	0.203382986	0.238168986	0.475286641
E07000079	2010	0.506657578	0.58638799	0.610714744	0.316916789	0.175707656	0.192956162	0.651694941	1.667148519	0.289334893	0.394091876	0.2524405	0.307691625	0.396095361	0.759888284	0.752528348	0.24544426	0.880729436	0.016606862	0.0947536	0.8782946	0.950143364	0.900904349	1.173139889	0.351140647	0.49586883	0.385123971	0.145056791	0.834082976	0.070935387	2.200477131	0.04514265	0.2431914	0.234065066	0.885425661	0.611871357	0.222420448	1.630958359	0.497547727	0.306692588	0.07406626	0.321758578	0.1165123	0.364735321	0.718748958	0.330218835	0.224786448	0.262570102	0.500636974
E07000080	2010	0.496673323	0.588313111	0.604015091	0.313230456	0.176641699	0.189145706	0.653913028	1.589741601	0.279380228	0.38880806	0.23914429	0.302926324	0.401786117	0.754814955	0.754397937	0.237235945	0.856776441	0.017260114	0.094614549	0.854382659	0.929414582	0.875796031	1.143579086	0.340165303	0.494203567	0.37465941	0.144867549	0.836206016	0.069661321	2.134935369	0.042091113	0.243140385	0.229829674	0.888270412	0.598068961	0.218574545	1.709948106	0.495143152	0.302243748	0.075351029	0.310146935	0.110270654	0.362336431	0.708589701	0.330733081	0.225412417	0.262555118	0.497427935
E07000081	2010	0.431668664	0.54096773	0.551461792	0.282769132	0.161227558	0.161424491	0.594206931	1.590733812	0.25663628	0.355978893	0.215571294	0.253618654	0.363274495	0.746117465	0.682345619	0.217716801	0.759308791	0.013958091	0.095960205	0.776388569	0.870960963	0.765363822	1.042760902	0.291920301	0.434166957	0.3320129	0.130808771	0.704390405	0.071900117	1.896084641	0.041598888	0.22111824	0.197558642	0.83343256	0.567941022	0.202409187	1.379696539	0.406201824	0.273516971	0.090074493	0.265178034	0.099601892	0.306554448	0.612359576	0.314141603	0.203884961	0.224327015	0.466097595
E07000082	2010	0.499304298	0.584920797	0.603313884	0.307368126	0.182241055	0.187759776	0.659984738	1.531607382	0.2810604	0.382610502	0.234993938	0.300168696	0.40887803	0.752709784	0.743733493	0.238956223	0.854710477	0.016966599	0.096908531	0.849066595	0.929796973	0.858463226	1.134658057	0.332330884	0.486721738	0.372141991	0.146277927	0.822216123	0.07351379	2.066441616	0.043196889	0.241118643	0.226809142	0.883844066	0.585311725	0.218493769	1.701359436	0.477333476	0.29915014	0.074977398	0.297062068	0.110116366	0.366432402	0.672634689	0.3283982	0.226127099	0.263440915	0.506076833
E07000083	2010	0.492211979	0.576386492	0.59511414	0.312722213	0.173339668	0.18444282	0.642602871	1.529808623	0.281785539	0.389973482	0.237755645	0.289942615	0.39471208	0.751700296	0.747971793	0.23767491	0.846710731	0.016942158	0.093697908	0.850321592	0.931365019	0.867081668	1.136691483	0.334526239	0.483698344	0.369345423	0.144156918	0.810735671	0.06934959	2.116537597	0.043495201	0.239430702	0.224280411	0.872121717	0.596601239	0.217149878	1.668719819	0.484049233	0.298430139	0.075994681	0.302449097	0.108208547	0.347634745	0.696391825	0.328720385	0.220399508	0.256334863	0.494958025
E07000084	2010	0.481227279	0.592486104	0.602254254	0.306796977	0.182819635	0.175546728	0.66413237	1.550904854	0.267538557	0.380919999	0.218413589	0.275786286	0.412822579	0.77862966	0.744669915	0.234294552	0.831567625	0.016762555	0.103114936	0.823803519	0.925478773	0.813865751	1.104823394	0.308665271	0.465991379	0.357022955	0.147531311	0.764350166	0.078487238	1.987627287	0.044635211	0.238542545	0.212985223	0.883029016	0.59025813	0.2172218	1.677774189	0.436514595	0.291524357	0.09070261	0.275891468	0.101898046	0.345366239	0.644756542	0.335709582	0.223248902	0.254247917	0.507750302
E07000085	2010	0.519397085	0.596207794	0.619497018	0.315827463	0.190496388	0.190669319	0.683551888	1.478024116	0.282499206	0.394872862	0.232621943	0.298324408	0.424313091	0.764570129	0.765614418	0.242886473	0.86879283	0.017664857	0.099656442	0.867078188	0.944657742	0.87079043	1.144647409	0.333321173	0.498540229	0.376882139	0.154626539	0.830667452	0.075358587	2.095779359	0.043958851	0.247278464	0.224256395	0.906622966	0.593921016	0.223969488	1.820864601	0.484236186	0.304087785	0.074142139	0.29940316	0.106963186	0.374417272	0.687858946	0.332664013	0.233703908	0.27002177	0.513243991
E07000086	2010	0.487436266	0.590806335	0.600084227	0.317635286	0.169841797	0.180971694	0.645957417	1.610189024	0.281882889	0.392183667	0.233661583	0.286597309	0.400361969	0.785236349	0.760692852	0.239643183	0.857632026	0.017042279	0.097632909	0.851359807	0.93993232	0.85137064	1.140408734	0.327233169	0.479920764	0.371643237	0.143202272	0.79651181	0.071344679	2.107706926	0.045790576	0.239558235	0.219589847	0.876177163	0.608503401	0.215533222	1.673794754	0.469062106	0.296286478	0.089639502	0.293338612	0.107091735	0.342539425	0.679404562	0.344144548	0.218201471	0.253465277	0.507610258
E07000087	2010	0.508362955	0.597419457	0.613496634	0.323054022	0.176474613	0.191164572	0.661280811	1.633108402	0.286925054	0.399433378	0.24564149	0.300984328	0.405489753	0.786820242	0.774743431	0.246112091	0.880392275	0.01777302	0.097678552	0.877638451	0.95792255	0.893457974	1.174349714	0.345795571	0.498008706	0.38188284	0.146650229	0.831554791	0.07224799	2.189632019	0.045817729	0.247612355	0.230223655	0.89753329	0.620768645	0.222517634	1.707243067	0.494170234	0.306574495	0.08133141	0.312941106	0.112360165	0.361310023	0.714528903	0.341746497	0.226600233	0.263543675	0.509531896
E07000088	2010	0.46201547	0.568541925	0.581470523	0.30550318	0.168464326	0.17426969	0.618323093	1.695584519	0.274609889	0.378593908	0.233158124	0.27849385	0.377449916	0.77146039	0.721972637	0.234498517	0.823115046	0.015357967	0.096613857	0.828796673	0.915487641	0.828790602	1.11054533	0.320951415	0.460391171	0.360003215	0.135705948	0.76038746	0.070950841	2.063571534	0.044129189	0.230840829	0.214263653	0.85995109	0.599510122	0.212131997	1.480692336	0.447610152	0.289153561	0.091035746	0.291356709	0.107803183	0.328343533	0.676021578	0.329261359	0.213083421	0.240991144	0.484508128
E07000089	2010	0.511184438	0.600931258	0.616360089	0.31700536	0.189303487	0.185455099	0.683881343	1.497425058	0.279815464	0.401117927	0.227873281	0.288198932	0.430353781	0.774536348	0.774974333	0.244219257	0.877578888	0.01878395	0.102301142	0.856754748	0.946523208	0.850026211	1.136875773	0.325292446	0.486846974	0.374787489	0.151783583	0.80952325	0.075627943	2.073046213	0.046346387	0.243099046	0.217634269	0.879023284	0.594785811	0.218995564	1.876619022	0.468382486	0.2975413	0.081724732	0.286525138	0.103332648	0.367071627	0.663121673	0.344441649	0.227620638	0.268463433	0.525123298
E07000090	2010	0.499700403	0.585661714	0.600595593	0.316939554	0.175164576	0.188245507	0.644303889	1.655447261	0.286259343	0.390167769	0.244286729	0.298891295	0.394560461	0.771070525	0.756765013	0.242059192	0.861099976	0.0165037	0.095218096	0.867868909	0.93866916	0.873134482	1.155678277	0.341535889	0.492443359	0.373744599	0.143550279	0.82564726	0.069930116	2.149612818	0.044152496	0.240120685	0.227263678	0.875019262	0.606316732	0.219404284	1.630859738	0.485897909	0.303073827	0.08188255	0.308441409	0.11193275	0.357149912	0.71246793	0.333566312	0.221004826	0.259418383	0.499716287
E07000091	2010	0.529420095	0.605220112	0.6306643	0.332667647	0.186160221	0.20240514	0.683665448	1.643363194	0.293604609	0.407232945	0.258323858	0.314006691	0.415761039	0.780229001	0.782365925	0.249617861	0.899351978	0.018255233	0.098529971	0.901950516	0.971783629	0.927337481	1.201418524	0.363249438	0.516437437	0.387742161	0.149273807	0.867076277	0.074838129	2.247336189	0.04543021	0.253444881	0.243810361	0.904481213	0.618531311	0.233621791	1.720142335	0.510782236	0.319604416	0.081246704	0.329691517	0.118880629	0.391618138	0.752138928	0.33502616	0.237393625	0.277063291	0.514774148
E07000092	2010	0.454754908	0.577028461	0.580215785	0.301345907	0.168371795	0.162172231	0.635188445	1.533920275	0.257037221	0.37197595	0.207037828	0.250322105	0.393183176	0.782914066	0.721753922	0.224694667	0.786070519	0.015832327	0.103321569	0.793078008	0.901655409	0.762779011	1.062461847	0.285348278	0.445465056	0.342344147	0.14293785	0.710250473	0.076843702	1.912636773	0.043426252	0.229131098	0.197079477	0.856907785	0.585068503	0.209766601	1.566890717	0.404727279	0.279306732	0.099517065	0.257819936	0.094736969	0.314226431	0.600834146	0.333359723	0.210844997	0.237141216	0.493635018
E07000093	2010	0.509606546	0.601406045	0.615356097	0.317742091	0.181232977	0.186987295	0.671208361	1.579706219	0.284246161	0.399117481	0.235283553	0.296953803	0.414136079	0.782476017	0.774456903	0.24238616	0.866902149	0.01752206	0.100430693	0.868180505	0.953775548	0.87542581	1.157628473	0.335199404	0.4957271	0.380985763	0.150039282	0.829911919	0.072324444	2.133085494	0.044344675	0.24761331	0.2281491	0.9052975	0.611560201	0.22320513	1.753095317	0.490531798	0.304418304	0.079868918	0.304470061	0.10779672	0.359485924	0.693919077	0.341913215	0.229330857	0.264605566	0.515878088
E07000094	2010	0.509416362	0.598588893	0.614043535	0.319470146	0.182727089	0.188808993	0.672544815	1.544653681	0.285642027	0.394598063	0.236741636	0.296591196	0.417563632	0.774945248	0.77339732	0.243131266	0.875678562	0.018056825	0.098580836	0.863499802	0.947536885	0.864587181	1.152493019	0.332613966	0.492368616	0.376695504	0.149194836	0.816960415	0.074658593	2.106045572	0.045335287	0.242960065	0.226920377	0.875520371	0.599039361	0.222759391	1.773685848	0.471683134	0.30246059	0.084036619	0.295329014	0.109603971	0.37296173	0.675923862	0.338993484	0.226409916	0.268125375	0.521171829
E07000095	2010	0.465142383	0.564462203	0.581912272	0.294386764	0.175154945	0.172198179	0.630203592	1.482857586	0.266010219	0.36930821	0.218952184	0.268330137	0.389872376	0.754035647	0.707132896	0.227919335	0.794605745	0.015568692	0.100024976	0.803913445	0.903548866	0.794749413	1.078588451	0.302133489	0.45706594	0.345142128	0.140455338	0.750441305	0.074965467	1.931364281	0.041827371	0.232195253	0.205829485	0.85579403	0.570257305	0.210663353	1.558928312	0.431371549	0.283865061	0.083360166	0.269396742	0.103737775	0.342359467	0.618821397	0.315380978	0.217972943	0.246173178	0.495355331
E07000096	2010	0.48477938	0.586564019	0.597412361	0.310754314	0.176416938	0.175532719	0.656233251	1.521028252	0.267950377	0.382626618	0.219281844	0.27332564	0.407487735	0.766928801	0.742434407	0.234421972	0.828869681	0.016840088	0.101808959	0.817909805	0.917515121	0.812153365	1.099498643	0.307165128	0.469955219	0.35936959	0.145175481	0.764087152	0.075656742	2.004761408	0.044449273	0.238000492	0.213331318	0.866707144	0.586201307	0.216073643	1.693482592	0.440531027	0.289784741	0.090753876	0.276580346	0.101727609	0.349359691	0.633048967	0.334322056	0.220757498	0.252337522	0.506258614
E07000098	2010	0.478854579	0.563242074	0.588829391	0.2844584	0.196101902	0.175984006	0.659666584	1.384260915	0.263453981	0.36200322	0.212894089	0.268862277	0.409619971	0.743988179	0.710582961	0.229180512	0.786656797	0.014426264	0.103913398	0.799845792	0.903260836	0.783285694	1.066223673	0.298263568	0.452689366	0.337697275	0.146547285	0.741751974	0.084970004	1.834745303	0.042356315	0.235257265	0.205500123	0.878624613	0.547758524	0.218511276	1.490818491	0.405863656	0.287070977	0.078908078	0.258792146	0.103022757	0.356223567	0.600557231	0.30546774	0.227974997	0.25345546	0.498789012
E07000099	2010	0.487182531	0.582220488	0.595978384	0.305123115	0.182110956	0.177754605	0.659887047	1.458577089	0.26624415	0.38096735	0.219593099	0.27118195	0.411094889	0.757464587	0.735652351	0.23295386	0.823844445	0.017358829	0.100695026	0.819106923	0.912933556	0.814063241	1.098155316	0.309630809	0.469884248	0.352531491	0.146204444	0.759292218	0.078078491	1.987634377	0.044064589	0.237298686	0.213841274	0.861087526	0.57784758	0.216517068	1.694426195	0.434669463	0.290713847	0.083826305	0.274765716	0.102083227	0.353015761	0.643262101	0.328141197	0.222740613	0.256248718	0.502009423
E07000102	2010	0.486920837	0.579509784	0.59366767	0.296612259	0.187186673	0.177873976	0.660038387	1.409395915	0.267222506	0.37386557	0.218744973	0.272694964	0.409707201	0.757613755	0.730004682	0.233247343	0.810650371	0.016680867	0.102796933	0.813533467	0.9133518	0.806115333	1.09300351	0.30830468	0.462495085	0.346773186	0.146147137	0.755588633	0.082516803	1.940295622	0.043337065	0.238155801	0.212152441	0.869950388	0.568295854	0.218298624	1.605571544	0.423623623	0.290985406	0.083324813	0.269354501	0.104022773	0.354000428	0.628528442	0.319876289	0.224095404	0.255342793	0.498486162
E07000103	2010	0.443657792	0.561364012	0.565003198	0.285375065	0.170723185	0.160376939	0.622703177	1.52656539	0.25603168	0.358550002	0.206379038	0.249571189	0.388041522	0.767480495	0.705094875	0.224399367	0.773249126	0.0150428	0.101906575	0.770865446	0.887468809	0.740126213	1.047611661	0.281451947	0.431563925	0.330862135	0.136543289	0.6918251	0.081128533	1.850566321	0.043956381	0.222397362	0.196816507	0.832055288	0.568154486	0.20521463	1.451778413	0.38515243	0.275038759	0.098166105	0.247327953	0.097419185	0.312757205	0.587306988	0.322810446	0.205303384	0.234681735	0.486123805
E07000105	2010	0.476558844	0.577560099	0.586113804	0.307490874	0.168208507	0.177208162	0.628889046	1.619076849	0.276981545	0.386532561	0.234294911	0.278394033	0.384335712	0.782093689	0.743677657	0.236343429	0.828751059	0.015853478	0.09709258	0.837777627	0.930337776	0.83984863	1.12526414	0.323384614	0.465477221	0.361822767	0.139767222	0.779051788	0.071433613	2.064682804	0.044926382	0.238136098	0.216095794	0.873604406	0.607876677	0.213945707	1.5379386	0.453449209	0.293498788	0.096189592	0.291271981	0.106842192	0.330340711	0.660540963	0.332993457	0.212260738	0.244358804	0.496449783
E07000106	2010	0.469326967	0.563681381	0.574745538	0.303100631	0.166144036	0.178134051	0.616748982	1.67000167	0.275719856	0.374504574	0.235884145	0.280351037	0.376494576	0.766483726	0.734313012	0.23077261	0.824241729	0.016131996	0.093235781	0.828066329	0.908158012	0.83221327	1.113636663	0.323122129	0.462771362	0.35495471	0.137181708	0.769949453	0.070213922	2.066198312	0.043950208	0.229125438	0.2164252	0.83678311	0.587124905	0.211716598	1.501655163	0.45047789	0.29088659	0.084696378	0.289956887	0.109392811	0.340255161	0.684115193	0.324023505	0.209576843	0.245328636	0.483120096
E07000107	2010	0.453253362	0.568294089	0.572900783	0.294308739	0.164752131	0.167515568	0.617359727	1.591353898	0.266276805	0.368020947	0.217747019	0.26420027	0.382877824	0.771966098	0.721149594	0.229490954	0.801145789	0.015759515	0.097037224	0.800342592	0.9000426	0.786791309	1.085123368	0.30014219	0.449321983	0.347098711	0.137043916	0.738585769	0.072593249	1.955623014	0.043830343	0.228992148	0.205669941	0.84506583	0.588927184	0.206616048	1.496727449	0.423927314	0.280705728	0.094636507	0.267355506	0.102274807	0.320308105	0.623682956	0.327036707	0.207828995	0.236103375	0.49180711
E07000108	2010	0.486570587	0.595109495	0.605342463	0.317965751	0.175626612	0.18609482	0.647886121	1.746476274	0.282266786	0.393363454	0.247190556	0.296295513	0.3960994	0.778987662	0.75139382	0.244635424	0.865240399	0.017072209	0.098830044	0.859587829	0.938359312	0.873549446	1.15593342	0.341853351	0.488942929	0.374365606	0.141667735	0.814495851	0.072243227	2.176773115	0.044462194	0.240006534	0.23076024	0.873600623	0.612143093	0.220541691	1.607733058	0.479418373	0.303761983	0.089962336	0.309680201	0.114057155	0.359451769	0.719421624	0.334596141	0.222696337	0.256215983	0.497367095
E07000109	2010	0.461381444	0.56493586	0.575049739	0.29556728	0.170229573	0.171682281	0.624246433	1.547014537	0.270463082	0.373071718	0.223641449	0.264594343	0.38354029	0.766551811	0.72312098	0.228598566	0.794276136	0.015522031	0.097212625	0.808812954	0.91175257	0.799967782	1.090212951	0.308134737	0.449158977	0.347676103	0.137583429	0.74129364	0.074052403	1.953202001	0.043887555	0.230743873	0.209531313	0.853513003	0.58024445	0.212436562	1.483285168	0.427675755	0.285053601	0.091861125	0.273622881	0.104094113	0.327514876	0.630537239	0.321848565	0.211618258	0.241340086	0.494650597
E07000110	2010	0.496359615	0.597904501	0.602426122	0.314485999	0.177415543	0.18080723	0.658289484	1.578547296	0.278706196	0.39193305	0.22746483	0.285216289	0.408632331	0.785243898	0.759822642	0.236844482	0.849383545	0.016950813	0.100855098	0.843990949	0.935048281	0.841552934	1.130529051	0.321312497	0.483623053	0.369541518	0.146461047	0.798739744	0.071813635	2.066375558	0.045292918	0.242023366	0.22037684	0.880711402	0.60033237	0.218593173	1.724272204	0.467725663	0.297944864	0.08588954	0.286942683	0.10503819	0.352681959	0.668007644	0.339722655	0.22243044	0.260255941	0.513694082
E07000111	2010	0.503258925	0.588029004	0.611425236	0.314655394	0.182908699	0.188623166	0.665517805	1.514369523	0.284419068	0.389527391	0.238519168	0.296422118	0.41080573	0.763785727	0.754750189	0.24376722	0.860017119	0.017035221	0.099022905	0.855770538	0.94564868	0.861068452	1.141337324	0.332946522	0.48678223	0.370959984	0.148448383	0.811174904	0.076970208	2.091574038	0.044986795	0.242526131	0.224600823	0.884981151	0.591675837	0.221417521	1.702039622	0.468722967	0.301027275	0.082121618	0.298085452	0.110725886	0.36834422	0.6752765	0.327934308	0.226239331	0.264944095	0.508694909
E07000112	2010	0.485774079	0.583622507	0.59968186	0.318258143	0.171797233	0.186425683	0.641151999	1.714421238	0.281078158	0.386274933	0.245832094	0.296753619	0.390666934	0.774158088	0.748987477	0.242867011	0.856678009	0.017346346	0.09633389	0.854581892	0.931251598	0.871972627	1.151133311	0.339173444	0.485985036	0.37094413	0.141516165	0.80544593	0.071235579	2.171093964	0.044577816	0.23800855	0.227998411	0.871221129	0.609072786	0.218725589	1.615692358	0.475302069	0.301016221	0.089517849	0.311026013	0.113226374	0.354411199	0.71761472	0.331655791	0.219608918	0.251485332	0.490738163
E07000113	2010	0.47160041	0.583172085	0.587583951	0.312872679	0.166376617	0.178965122	0.629321226	1.66843939	0.278002915	0.386289236	0.231205274	0.285928954	0.388706755	0.77793713	0.751632145	0.237046543	0.844077081	0.016823778	0.0955408	0.835504409	0.924896765	0.843307536	1.13103416	0.324997494	0.471496254	0.367649383	0.13926774	0.794302602	0.067473626	2.096579662	0.044258381	0.236010735	0.219545738	0.866861594	0.608853542	0.211481471	1.603896588	0.469691699	0.292103586	0.09434754	0.294596652	0.106614732	0.334362918	0.67984362	0.337226582	0.213167332	0.245758209	0.497975602
E07000114	2010	0.479360723	0.563745287	0.592177099	0.311902043	0.175664196	0.186111128	0.635203859	1.631628975	0.283165985	0.385795595	0.244223085	0.287388885	0.382387228	0.765145249	0.729326301	0.237001802	0.832568458	0.016256772	0.095320374	0.848467913	0.931353958	0.868004635	1.137331243	0.33708761	0.47367971	0.359171655	0.139569403	0.79134409	0.074088048	2.103986839	0.043618473	0.237719833	0.225206372	0.878465397	0.59658127	0.220875161	1.490367031	0.464288457	0.300349662	0.089240129	0.305232317	0.11317148	0.349314329	0.704342581	0.322222879	0.220924027	0.249138075	0.492803357
E07000115	2010	0.492331586	0.590181567	0.595293719	0.316728335	0.168499604	0.181322039	0.640625212	1.597413163	0.28377559	0.39395898	0.234377422	0.288841641	0.396151013	0.787231904	0.766462736	0.241578764	0.859931036	0.01675342	0.097418179	0.855244205	0.94271688	0.853067324	1.144858629	0.328546612	0.479066074	0.37597748	0.141892825	0.803738306	0.069681481	2.117337153	0.046194689	0.239928743	0.2196916	0.872071289	0.612292754	0.214803398	1.674224401	0.47178617	0.295318751	0.091647394	0.294097434	0.107414122	0.340852598	0.665040576	0.343984749	0.215761352	0.251864825	0.508052735
E07000116	2010	0.487647001	0.585377261	0.601980167	0.309174979	0.179977192	0.179599988	0.654749893	1.560202268	0.275826339	0.383764876	0.228049526	0.285670751	0.407499167	0.764428031	0.749877359	0.237606071	0.847240106	0.017170963	0.099559193	0.834383748	0.929059393	0.825637091	1.115311105	0.317044582	0.477291308	0.362629195	0.147602536	0.78371574	0.0752661	2.039339434	0.044980641	0.237344954	0.217302611	0.866517693	0.586434521	0.215244003	1.732553471	0.448650149	0.292869831	0.090440964	0.281213092	0.106388853	0.356793031	0.640670011	0.33526458	0.22004278	0.25962849	0.513493615
E07000117	2010	0.435013646	0.541067704	0.555276294	0.289499391	0.155049885	0.165017802	0.587777829	1.668362538	0.262498208	0.357970986	0.223980307	0.266004597	0.358168205	0.745731423	0.686965698	0.223039886	0.781701153	0.014480886	0.09247992	0.786668384	0.872608212	0.78330751	1.065125595	0.303504239	0.441706236	0.341923616	0.130858392	0.733525464	0.067656881	1.967311447	0.041888266	0.22092365	0.202565285	0.831362674	0.572385345	0.200997326	1.405418591	0.424149599	0.276162088	0.095806404	0.279126414	0.104531521	0.307573987	0.640735728	0.315731303	0.199634291	0.224787449	0.465611491
E07000118	2010	0.471739371	0.565380719	0.578890165	0.298315865	0.165343702	0.174972229	0.622474487	1.596696717	0.270627431	0.374142648	0.226928688	0.280748339	0.383519823	0.751601806	0.725018154	0.229198472	0.825782286	0.015655319	0.092967331	0.826816631	0.901803116	0.827662764	1.103891337	0.316838429	0.46518147	0.360388483	0.141754353	0.78033878	0.068267201	2.040090169	0.042893619	0.230907069	0.211119071	0.857923487	0.589210465	0.2069887	1.614342068	0.458619785	0.286844321	0.079984869	0.287356259	0.103219118	0.327641606	0.669112937	0.329621693	0.210194346	0.242215421	0.484636519
E07000119	2010	0.503014957	0.582752078	0.603130836	0.316122382	0.177710355	0.191602392	0.655043544	1.573597001	0.278422212	0.389222644	0.244393464	0.29439524	0.398793082	0.746864024	0.749394868	0.240252106	0.857250502	0.017751294	0.095946431	0.85701514	0.924561775	0.886546401	1.149258772	0.343946824	0.494922951	0.36779136	0.145154606	0.816698327	0.071388986	2.168017219	0.043555252	0.242629485	0.232116933	0.87026373	0.594825868	0.222357071	1.680651884	0.488647025	0.305112572	0.074610079	0.312570903	0.112113372	0.368648943	0.720710409	0.323991511	0.226562425	0.262058869	0.486995671
E07000120	2010	0.423014593	0.525228902	0.538693439	0.276829809	0.156483105	0.162042075	0.579376005	1.538954158	0.251917668	0.348216058	0.214372271	0.250848339	0.351120462	0.727062706	0.667408346	0.214475927	0.741871121	0.014140977	0.092650632	0.761162474	0.848599453	0.761447654	1.028270471	0.292880686	0.425216457	0.321351751	0.130668919	0.695703941	0.071538519	1.873983493	0.039657336	0.216764333	0.196635836	0.819552103	0.553981069	0.199133374	1.323113144	0.403539039	0.269795949	0.088210673	0.266313716	0.100132661	0.299214185	0.616021077	0.300430253	0.198538138	0.218824463	0.446584396
E07000121	2010	0.460862532	0.566114373	0.574641234	0.307515678	0.160721457	0.175564142	0.61098333	1.695099585	0.270500218	0.375153353	0.234646216	0.280004826	0.3735186	0.759811843	0.728137166	0.229275302	0.828644577	0.01671626	0.092461998	0.821744711	0.900132068	0.830181759	1.110263857	0.322231531	0.461815841	0.3562672	0.135461444	0.766197377	0.067255552	2.083448981	0.043742086	0.226613851	0.216768799	0.831532644	0.588698448	0.208125113	1.544600171	0.454279224	0.28773816	0.090356045	0.291515191	0.107829992	0.331633681	0.682278434	0.329064927	0.205750279	0.240181847	0.480026772
E07000122	2010	0.4253625	0.525194589	0.545770299	0.275245605	0.163477064	0.162310878	0.596031045	1.552694223	0.251222164	0.346275543	0.215890875	0.251001985	0.35645023	0.735581278	0.661128619	0.214520404	0.735503022	0.013734687	0.09612587	0.758612698	0.854995962	0.756176912	1.028262925	0.293216604	0.420011641	0.318708002	0.12897558	0.685715311	0.077323291	1.838209303	0.040109733	0.219394478	0.198688001	0.826826509	0.550070051	0.206522615	1.274360201	0.389605389	0.272101187	0.095914219	0.266871429	0.102089748	0.307675309	0.603366402	0.29408817	0.203367132	0.222419604	0.450965372
E07000123	2010	0.399304834	0.514434822	0.522929395	0.262830815	0.152242594	0.151239733	0.564694759	1.622659762	0.246502141	0.334505914	0.20831844	0.240181274	0.339150009	0.743413979	0.650246152	0.209108308	0.713391561	0.013273462	0.094628298	0.731461694	0.838445948	0.717946842	1.002146291	0.278560257	0.401297028	0.307305185	0.124935661	0.642740887	0.07540164	1.789055293	0.041075726	0.208591707	0.189732213	0.796362226	0.546852342	0.195790341	1.191570667	0.366180049	0.263169613	0.096341306	0.250051573	0.10070764	0.283193486	0.592193159	0.295139105	0.190070755	0.211370073	0.440653754
E07000124	2010	0.504155262	0.579878539	0.59398493	0.304737045	0.180861888	0.186971786	0.654978756	1.494296742	0.281042621	0.385166587	0.23087692	0.300967847	0.405486552	0.747628263	0.743800535	0.237432117	0.851400347	0.016519826	0.095557641	0.848879002	0.923661383	0.85659358	1.123675571	0.330064216	0.487277216	0.371782226	0.1474393	0.826511697	0.071481747	2.06971448	0.042956528	0.241435864	0.223184635	0.879103304	0.582249453	0.216892066	1.718337356	0.483895978	0.29689896	0.069999151	0.296417408	0.108044403	0.363398113	0.67715146	0.323263838	0.224092699	0.261645134	0.501207971
E07000125	2010	0.43918952	0.555669151	0.564978567	0.291409133	0.159139599	0.169776798	0.593595697	1.724656042	0.270578712	0.363135345	0.231845329	0.279407363	0.362414125	0.771928496	0.702916323	0.231814159	0.81029785	0.015384788	0.094536232	0.804544305	0.899028226	0.806607491	1.096249169	0.315815517	0.444197341	0.349555013	0.133703283	0.742345525	0.072354858	2.021185628	0.044172711	0.223448486	0.209724136	0.84778856	0.589396464	0.20281236	1.393640249	0.431238022	0.280362809	0.094161552	0.284061894	0.111264896	0.309800937	0.652409705	0.320477396	0.200223447	0.228648858	0.473892538
E07000126	2010	0.472031519	0.565383984	0.57934355	0.301831489	0.166366534	0.174972378	0.626346448	1.550499176	0.270824626	0.378016096	0.225491116	0.275701778	0.385040059	0.752072868	0.731873872	0.228462952	0.817519018	0.016156492	0.094106213	0.826307357	0.906833335	0.82929535	1.10069357	0.317131004	0.465219072	0.357154726	0.141043445	0.775495306	0.068018258	2.033721289	0.042760674	0.232461005	0.212908622	0.855041993	0.586996889	0.209866843	1.602233072	0.458560467	0.288527409	0.079244451	0.288312253	0.102438133	0.329203923	0.667585183	0.327782898	0.21344309	0.245567358	0.484786493
E07000127	2010	0.472856392	0.563963693	0.576847591	0.297984787	0.171192805	0.176756666	0.627113996	1.588114558	0.267113066	0.372474277	0.226842974	0.283236086	0.382875418	0.747117015	0.723326529	0.230672694	0.823025919	0.016101005	0.095360693	0.823780145	0.900283767	0.830278595	1.095180544	0.319463477	0.467004084	0.357324217	0.138148087	0.782247664	0.068660832	2.030391262	0.042154313	0.231799008	0.213633829	0.852998361	0.58443434	0.210751367	1.590131893	0.459302599	0.288793875	0.080953508	0.29097479	0.104137655	0.341552761	0.671253373	0.32024592	0.214577556	0.244975435	0.482506701
E07000128	2010	0.5003477	0.573254178	0.594310891	0.315740052	0.175415318	0.193253299	0.639051928	1.608041678	0.284426262	0.389369258	0.247735836	0.304270022	0.389147129	0.747349959	0.743852051	0.239032332	0.859483046	0.016565062	0.091214219	0.865993161	0.928370617	0.884428954	1.148141386	0.347632405	0.492170724	0.371662228	0.140805068	0.83561022	0.069125732	2.154866507	0.042857379	0.238834315	0.231545136	0.872501903	0.592033295	0.219603748	1.616926919	0.495935618	0.303190762	0.073689647	0.316731222	0.11406491	0.363961484	0.724643183	0.322158229	0.223153312	0.261617974	0.490148781
E07000129	2010	0.474875658	0.570287313	0.584670377	0.298240364	0.178643945	0.176494411	0.640572188	1.519753711	0.268075745	0.379332305	0.226676116	0.271975821	0.395556705	0.747452832	0.71713227	0.232603104	0.817314333	0.016569901	0.099656293	0.82169499	0.905715756	0.8194115	1.095408451	0.317324517	0.464243158	0.353467524	0.140674982	0.762975449	0.075006009	1.999069512	0.042964305	0.233790318	0.212567409	0.853859476	0.580072458	0.214091504	1.575059382	0.442572781	0.290458979	0.080045667	0.283520683	0.104601989	0.344512306	0.653483793	0.318468389	0.220386804	0.249609032	0.485300637
E07000130	2010	0.448445779	0.554200055	0.567911967	0.28312724	0.169241319	0.170230149	0.617262672	1.578496119	0.259118939	0.357712877	0.220306171	0.267748207	0.378227475	0.745536907	0.699467522	0.222899335	0.780180943	0.015093092	0.096547905	0.787074635	0.884677431	0.788473412	1.066519646	0.305109275	0.444196975	0.336614953	0.13698726	0.730372021	0.076213846	1.917004055	0.041580594	0.227604645	0.208189121	0.845051547	0.564304536	0.209737864	1.421116732	0.419683039	0.282553547	0.083279356	0.274733278	0.105419673	0.330043725	0.635500609	0.309608856	0.211749516	0.238837685	0.472507698
E07000131	2010	0.49473389	0.584124424	0.591287425	0.310645161	0.16832809	0.182627132	0.636753374	1.539266141	0.284074049	0.387811195	0.238455526	0.29079264	0.393315512	0.768459663	0.757111728	0.240949956	0.859831233	0.016899585	0.094173435	0.855065749	0.932163588	0.857999623	1.142090368	0.332127119	0.479877834	0.374699858	0.14220331	0.803973085	0.069260155	2.12150652	0.045071133	0.238196605	0.221788069	0.860139629	0.601596481	0.213469941	1.6744202	0.474501429	0.294573865	0.080246984	0.297190493	0.108540655	0.34158459	0.665472305	0.336678141	0.214827511	0.252512529	0.499270104
E07000132	2010	0.475255383	0.577846189	0.593319021	0.30415183	0.168384861	0.18237716	0.630122281	1.68941617	0.28099847	0.379503182	0.243177676	0.294301054	0.38614581	0.773203382	0.732514405	0.237856451	0.848825003	0.016296365	0.095301321	0.846788652	0.928531397	0.854565455	1.142479773	0.334617912	0.475284542	0.366759742	0.140625802	0.798350307	0.072644705	2.108222451	0.044967597	0.235817513	0.22275993	0.876860704	0.602996836	0.213385587	1.538020636	0.466995037	0.296363758	0.083342595	0.301241471	0.113606623	0.339047542	0.694832371	0.329630296	0.214580186	0.251273517	0.491515551
E07000133	2010	0.488331813	0.573619633	0.589041063	0.305849343	0.168363369	0.182576803	0.635783008	1.569359612	0.277556684	0.381334517	0.234999367	0.288022026	0.392112976	0.759493052	0.741387635	0.236143925	0.849628557	0.015801271	0.093326516	0.852763035	0.926184774	0.85542258	1.131527329	0.328427623	0.478214103	0.371353527	0.142770535	0.804542177	0.07007286	2.106115099	0.044335349	0.235660784	0.218560223	0.874775775	0.599690697	0.213395064	1.633362185	0.475230727	0.293383606	0.073604812	0.297727727	0.106827184	0.336672789	0.676422242	0.332478776	0.21624338	0.250607004	0.495575082
E07000134	2010	0.474527738	0.573443077	0.584034427	0.30579721	0.168035939	0.17856494	0.630623632	1.587882156	0.275002068	0.380924344	0.227345947	0.284873526	0.389110012	0.762123123	0.737044111	0.230619498	0.835819665	0.016584199	0.095510473	0.830605447	0.913671071	0.840292375	1.116680662	0.321853155	0.470438889	0.36125219	0.142157856	0.789343326	0.069093004	2.062385283	0.043450691	0.235900768	0.217019792	0.868446714	0.594498585	0.2108643	1.643869817	0.467469486	0.290393862	0.084298182	0.290544938	0.105095592	0.338219475	0.681911551	0.328039307	0.214987889	0.24693389	0.493771374
E07000135	2010	0.465780417	0.553940218	0.585301122	0.28217637	0.190724245	0.174422699	0.649475923	1.543472691	0.26130091	0.379969836	0.227374685	0.260877739	0.396232458	0.739338558	0.693523307	0.231756569	0.786760059	0.014622997	0.106949689	0.812015072	0.899452728	0.795991699	1.068283175	0.310617942	0.457832381	0.337204728	0.1392806	0.740568777	0.081141452	1.913755611	0.04233308	0.231817563	0.204986524	0.857695146	0.563613644	0.220984507	1.379910631	0.416452648	0.292023833	0.076554668	0.279475592	0.104212633	0.357910387	0.648302549	0.299582059	0.228429801	0.249295289	0.479604359
E07000136	2010	0.462142095	0.553217531	0.573026956	0.299250529	0.163037966	0.177930869	0.607228817	1.690981883	0.272672984	0.370803993	0.23956362	0.280704589	0.367735427	0.757651732	0.710652968	0.228937461	0.813946516	0.015103113	0.091206146	0.821635416	0.903123922	0.838234391	1.114043092	0.326669804	0.456666822	0.353548209	0.135809306	0.768554581	0.070660608	2.069599209	0.044239733	0.230716179	0.216217219	0.86119925	0.593543745	0.210368937	1.424396152	0.451530644	0.289068451	0.089335963	0.301093011	0.110629037	0.323980722	0.681065195	0.319920011	0.208937168	0.237901939	0.472872523
E07000137	2010	0.509134191	0.582281909	0.610174789	0.318749782	0.18093844	0.199564388	0.654913725	1.670585858	0.287668319	0.390665554	0.259257057	0.315512749	0.394518562	0.750757785	0.745363003	0.243979637	0.876942702	0.017239137	0.092781999	0.877458901	0.94002662	0.919181588	1.178921373	0.362141939	0.501771991	0.379782858	0.14429285	0.858281009	0.071130298	2.219082587	0.043800533	0.244131494	0.239968692	0.887567864	0.605181929	0.224638039	1.641363221	0.510900355	0.311767519	0.074702017	0.333847771	0.119472705	0.377326085	0.755650956	0.319320926	0.22829932	0.266090771	0.49077401
E07000138	2010	0.422211785	0.548099868	0.541616693	0.28755341	0.149502463	0.157957281	0.577200734	1.740532973	0.255326135	0.352763881	0.216362079	0.251518346	0.35460652	0.760994049	0.693589916	0.214164741	0.772204338	0.014719682	0.091855645	0.771731382	0.857629709	0.763669207	1.05621033	0.292098049	0.432458103	0.335935068	0.12808312	0.706157655	0.064322573	1.956218811	0.043151053	0.214979931	0.197994108	0.808184481	0.576556122	0.195424095	1.417150327	0.414553401	0.271433476	0.095220894	0.261778361	0.098872129	0.297638632	0.639635958	0.325444164	0.191196195	0.218497721	0.468610766
E07000139	2010	0.494478801	0.582646624	0.603535646	0.31065494	0.17665365	0.186498651	0.647301892	1.592048745	0.281506238	0.390203819	0.239493228	0.298007909	0.398730529	0.762085285	0.750638223	0.240559818	0.856294268	0.01641851	0.095900628	0.859897501	0.938083132	0.873240926	1.145395566	0.338901669	0.486616167	0.37468148	0.145688476	0.826698882	0.070135088	2.124258075	0.043038842	0.241269094	0.224060524	0.886700384	0.60411521	0.216930378	1.659066423	0.486475378	0.301265668	0.078735238	0.306788077	0.11027609	0.355576805	0.698153292	0.330509588	0.221539178	0.257854485	0.496715762
E07000140	2010	0.495520049	0.578701808	0.59532188	0.306885298	0.173541865	0.185783255	0.640192049	1.643318826	0.276641723	0.378332534	0.241222789	0.29371489	0.392251756	0.750337778	0.738436864	0.238813484	0.850455483	0.01616668	0.095163842	0.845238801	0.918323987	0.864978497	1.140674473	0.337127809	0.482325712	0.371776999	0.143225243	0.815183584	0.070039305	2.124205061	0.04393684	0.240584877	0.224894964	0.869962611	0.600901857	0.216628293	1.595385546	0.480272971	0.29795882	0.075832663	0.314235102	0.11108943	0.353471758	0.705507396	0.324831706	0.220758068	0.254661511	0.483176054
E07000141	2010	0.485020973	0.575312082	0.595587004	0.302441855	0.182660439	0.18235267	0.64943643	1.557672149	0.274271504	0.38357153	0.232314548	0.288085068	0.401258563	0.747778642	0.725499586	0.236552971	0.839720661	0.016302287	0.098038455	0.842935061	0.9199093	0.848525815	1.114816406	0.327658744	0.47727899	0.364378348	0.142974918	0.802471487	0.072947697	2.053055948	0.04259562	0.238331006	0.21906667	0.881133688	0.587152581	0.217160597	1.613360536	0.467494359	0.295559695	0.073817732	0.294658124	0.107311993	0.355127759	0.681045736	0.322839642	0.224965648	0.254501117	0.495857188
E07000142	2010	0.488540869	0.586276119	0.598289897	0.313791501	0.168006244	0.186950979	0.63689457	1.665874821	0.284446203	0.388714238	0.248242663	0.294072777	0.388379101	0.769598843	0.755465216	0.242510696	0.859527595	0.016662043	0.093404602	0.861262178	0.940240496	0.884893941	1.157494627	0.344312556	0.485398455	0.376228725	0.142273593	0.811369434	0.068918325	2.174526248	0.044513501	0.238991233	0.229079934	0.876573143	0.612760014	0.216219684	1.599662993	0.492320836	0.302181972	0.076746295	0.315857573	0.112739712	0.346034558	0.720059744	0.333742603	0.218992456	0.253718963	0.49051853
E07000143	2010	0.486521503	0.571829493	0.589623829	0.315992677	0.166442985	0.18665255	0.622183071	1.73387227	0.286388056	0.390783586	0.251055857	0.295190071	0.37683949	0.770941402	0.744781282	0.237317574	0.853447299	0.016559997	0.091704899	0.860947833	0.933763694	0.879261734	1.157015459	0.345133911	0.479243083	0.371610419	0.139518155	0.814338948	0.068142175	2.174650307	0.045147016	0.238057643	0.225284235	0.875368278	0.613653792	0.216107829	1.529336441	0.484377987	0.300797107	0.089307184	0.317767511	0.1136079	0.342426547	0.726084486	0.33169437	0.215183319	0.24852975	0.488116795
E07000144	2010	0.504649771	0.593800216	0.614347162	0.32069719	0.174282025	0.193218834	0.655969408	1.678014957	0.288503722	0.399134476	0.254550943	0.302985453	0.39829546	0.782640888	0.767619879	0.245367477	0.877982323	0.01741779	0.096670939	0.883699703	0.957829136	0.903375314	1.182426213	0.354504963	0.497485882	0.381053576	0.146134348	0.835059387	0.072868807	2.210149005	0.045497302	0.246576323	0.234537148	0.896469095	0.620879578	0.224438794	1.620330835	0.495838116	0.310678904	0.08115533	0.323048442	0.116314359	0.363734833	0.7321272	0.334174395	0.226019519	0.263558647	0.499978392
E07000145	2010	0.471013397	0.553638652	0.57845044	0.301950662	0.167863862	0.183124187	0.614209266	1.659932264	0.281378155	0.375336464	0.243135251	0.2899851	0.374253666	0.749551686	0.719703891	0.234001905	0.826342452	0.015226153	0.08999871	0.839616705	0.912515803	0.853683863	1.126920366	0.334302423	0.468103627	0.359108944	0.136954185	0.792278639	0.070255218	2.086565846	0.042843193	0.230740938	0.219604022	0.861345676	0.590481791	0.211298002	1.474285015	0.468882187	0.293453997	0.077255851	0.30208568	0.11260857	0.337181817	0.704318484	0.320061587	0.212498974	0.24642233	0.478884438
E07000146	2010	0.496890817	0.576568694	0.602153844	0.316065237	0.175109658	0.192211035	0.642988708	1.678456495	0.28596546	0.389339495	0.250775021	0.30319738	0.390376527	0.762411602	0.742219478	0.240020638	0.859691673	0.016472764	0.0936938	0.864568266	0.936601747	0.88434105	1.159397774	0.349549405	0.488478686	0.371640023	0.142128381	0.832101036	0.071497484	2.157892028	0.044129903	0.240586634	0.23057393	0.885329546	0.602900151	0.220882538	1.576656627	0.488672059	0.305290609	0.082560618	0.318105094	0.115959117	0.364771347	0.730469012	0.324812795	0.223472652	0.260584191	0.493080819
E07000147	2010	0.530771054	0.593983639	0.633691382	0.334309939	0.18557596	0.210729355	0.674053016	1.716728742	0.300628758	0.406204547	0.274681151	0.331306944	0.405004284	0.75825602	0.767568992	0.252033649	0.908782127	0.017393554	0.093290751	0.911581849	0.967574261	0.950004866	1.219046907	0.382707195	0.523664474	0.391805312	0.148916124	0.893594233	0.073272412	2.306385306	0.044356488	0.250585606	0.251456024	0.90460635	0.612106529	0.233699883	1.647220746	0.528218661	0.325812148	0.0753254	0.351582942	0.126656154	0.405911866	0.787175162	0.322959586	0.237878085	0.28202963	0.501812404
E07000148	2010	0.417633848	0.541301517	0.543883742	0.286948642	0.150880917	0.157610948	0.580694671	1.720465186	0.256832743	0.349279516	0.217073734	0.251673711	0.359559001	0.749558958	0.686439681	0.215138813	0.76769076	0.014769543	0.091057134	0.767499579	0.857520135	0.756507257	1.05181713	0.288773724	0.432674363	0.330732232	0.127494321	0.692762485	0.067039108	1.945268812	0.042703319	0.213084257	0.200971523	0.797888634	0.566372969	0.19590724	1.399801149	0.405753318	0.272028076	0.088084235	0.258190804	0.101644859	0.299741227	0.643190343	0.325512235	0.193266813	0.222037138	0.467803314
E07000149	2010	0.509100765	0.592635849	0.613967588	0.322337286	0.17834179	0.193529579	0.664475014	1.60666495	0.288767843	0.396876913	0.247507221	0.304054563	0.406312172	0.774786659	0.763672145	0.244202489	0.87996794	0.017643058	0.096538572	0.875507786	0.954187556	0.892156308	1.169852223	0.347635426	0.499084683	0.379923276	0.146798225	0.840096018	0.073126311	2.171448198	0.04524369	0.246434448	0.232826765	0.89670153	0.610356735	0.224043107	1.682960308	0.494498878	0.308245305	0.081293294	0.315447312	0.11427971	0.371787015	0.721883208	0.333827082	0.228350483	0.266609699	0.505773421
E07000150	2010	0.427641485	0.544925182	0.554525134	0.295427756	0.153813868	0.162166652	0.587901861	1.644088641	0.260991658	0.361358382	0.218178274	0.261255564	0.360449763	0.75744039	0.695465005	0.221172301	0.775790877	0.01429744	0.092905412	0.788317534	0.882253105	0.778042098	1.061500458	0.296872566	0.440551493	0.338657264	0.130573849	0.723613155	0.067014012	1.952721474	0.042000699	0.221783831	0.199445912	0.842292514	0.581674492	0.198989403	1.435915005	0.423409358	0.274936547	0.101666956	0.270640562	0.101021922	0.296518828	0.628423716	0.323782592	0.199278166	0.223908363	0.474705032
E07000151	2010	0.49264202	0.586062371	0.608195828	0.307665992	0.178741912	0.182469522	0.657835171	1.554707408	0.275673037	0.381158212	0.230123799	0.294694508	0.408498826	0.760942745	0.743678771	0.238662487	0.850978314	0.016787604	0.098559224	0.839178327	0.925449584	0.8422399	1.121585365	0.324828942	0.483036191	0.370791056	0.146993413	0.804502051	0.074956058	2.054654684	0.043687245	0.238738178	0.217692107	0.886365522	0.590946306	0.216164519	1.724005957	0.468693286	0.293521882	0.080984986	0.294629648	0.105544785	0.357221085	0.665390493	0.329377446	0.223583942	0.256822315	0.502590854
E07000152	2010	0.47322659	0.57720321	0.587361846	0.299852708	0.173337982	0.176204542	0.643035864	1.526400905	0.268354233	0.376844074	0.222121238	0.27687609	0.396067005	0.761021964	0.727594694	0.229246754	0.811931594	0.016708777	0.099238764	0.819339799	0.907620773	0.82150272	1.097689078	0.313480774	0.467554746	0.355337644	0.143799399	0.777708241	0.072930567	1.995755352	0.042315416	0.235837568	0.215539426	0.87321601	0.582430268	0.213588309	1.637461256	0.453532767	0.291593959	0.081740513	0.283789094	0.103287508	0.343457967	0.65578221	0.322792709	0.219734134	0.248219983	0.493455522
E07000153	2010	0.452150988	0.563263718	0.571324723	0.296309075	0.163633019	0.169437112	0.618185473	1.58203661	0.265278731	0.369741428	0.221436314	0.267837415	0.379300756	0.753878851	0.715727112	0.228522223	0.801495516	0.015846917	0.095660024	0.80302164	0.896889506	0.802618871	1.081663543	0.306463114	0.450534469	0.348505031	0.137205158	0.742426362	0.070392291	1.982929595	0.04340565	0.229122454	0.208719362	0.843976811	0.584236692	0.207650655	1.520132377	0.436682289	0.283285585	0.087173002	0.279047767	0.102328762	0.320591696	0.645144136	0.321985265	0.210590179	0.236181993	0.482044613
E07000154	2010	0.417994089	0.532342709	0.544708627	0.27502377	0.156912178	0.157098785	0.588393073	1.572245873	0.252892677	0.347613875	0.210528919	0.245075539	0.358369644	0.743367982	0.662606469	0.212998303	0.739794577	0.013764496	0.096116751	0.756811104	0.859273325	0.74091468	1.024478886	0.281805741	0.419611903	0.32135369	0.130550642	0.682820484	0.073313434	1.835169057	0.04190575	0.216694926	0.192235212	0.820919197	0.555026618	0.199189955	1.33650547	0.392691694	0.269670384	0.088925832	0.255264463	0.098483936	0.299648044	0.605602762	0.306716698	0.201369559	0.221548585	0.464530362
E07000155	2010	0.497314662	0.587365046	0.605935402	0.303383499	0.185101007	0.18442751	0.665048458	1.4937381	0.279158272	0.383083576	0.228301258	0.297385164	0.414383874	0.761659096	0.743741916	0.237903886	0.852879865	0.016288225	0.099799512	0.847909148	0.934181358	0.846638621	1.123435584	0.324529252	0.480062212	0.369999465	0.14793055	0.812934462	0.075253161	2.025173352	0.044105318	0.242271001	0.219508042	0.900283021	0.583062338	0.218162516	1.732772994	0.469260914	0.296238872	0.077149479	0.28735781	0.107003656	0.36153745	0.648147603	0.329668182	0.22551313	0.26226362	0.514264043
E07000156	2010	0.454300395	0.561073298	0.576351659	0.299520441	0.163304152	0.172631885	0.616287279	1.647550228	0.269454773	0.372216591	0.227467599	0.277241492	0.376668635	0.760404343	0.713259588	0.228196115	0.809456412	0.015360968	0.094831146	0.810430971	0.903285145	0.815516988	1.093801631	0.314828728	0.454870327	0.353781601	0.137106368	0.757894974	0.070338803	2.015905958	0.042771893	0.229575207	0.211107587	0.864845969	0.58737492	0.208869178	1.490540657	0.442328057	0.285654214	0.090441103	0.28889912	0.106148799	0.323324592	0.662941936	0.324611243	0.209985244	0.236011718	0.483344403
E07000163	2010	0.496698139	0.572989233	0.601982325	0.310831074	0.18003962	0.191853655	0.650909022	1.521723661	0.282317648	0.386923786	0.244779904	0.304715029	0.398350709	0.740561415	0.738594282	0.238294203	0.856236612	0.016520158	0.09292059	0.859456354	0.932111684	0.885305018	1.145093179	0.34457578	0.489324398	0.371853709	0.143510565	0.831991759	0.071445583	2.129169127	0.042284723	0.241487622	0.229807289	0.885188908	0.586529959	0.219905036	1.670517178	0.494611413	0.303488961	0.069832993	0.31015677	0.113367241	0.364644989	0.708447308	0.321530732	0.226716665	0.264210439	0.495941706
E07000164	2010	0.499653769	0.574683769	0.595334396	0.306730741	0.177078745	0.189068315	0.646580859	1.517548124	0.280754631	0.381922142	0.238648938	0.303001744	0.398671872	0.739310054	0.738111601	0.237502767	0.851396716	0.016049321	0.092235625	0.852284721	0.921588335	0.862899073	1.131005376	0.33599205	0.486331318	0.372470081	0.142874521	0.828413519	0.07052311	2.086434648	0.042185145	0.238119536	0.226437111	0.875392657	0.583914309	0.216504478	1.658822866	0.485396477	0.297809358	0.068280102	0.305033198	0.110825484	0.360191786	0.687191637	0.321870694	0.223661892	0.260381456	0.492556978
E07000165	2010	0.484949364	0.569090271	0.586197439	0.303060174	0.172210521	0.181536634	0.631876411	1.533744596	0.275818342	0.378403286	0.233732913	0.289468832	0.38965571	0.742306456	0.729246664	0.235399147	0.838358984	0.015981039	0.093781042	0.835224101	0.912836274	0.841319022	1.115427444	0.32646264	0.473289187	0.364498846	0.140979698	0.795123463	0.070451556	2.061606609	0.043645104	0.234861939	0.219791235	0.857413954	0.582345069	0.211899891	1.617806518	0.46464381	0.29145886	0.07563524	0.29352094	0.108131537	0.346372358	0.661718491	0.323526213	0.215303195	0.252738785	0.491346554
E07000166	2010	0.471887916	0.557432653	0.579725145	0.293598981	0.170873394	0.177424072	0.622649882	1.52962065	0.273083136	0.370820272	0.230144677	0.287106062	0.383672658	0.737562539	0.70647295	0.230963148	0.817218919	0.014960951	0.092584385	0.820019825	0.898060119	0.823900158	1.095858093	0.321133638	0.462223257	0.35594042	0.138568406	0.7835618	0.070444731	2.004107016	0.04105536	0.230886712	0.213126548	0.858723287	0.571808507	0.20916444	1.536819846	0.458037313	0.287534475	0.07466171	0.290585512	0.106490524	0.336878742	0.664077135	0.315427246	0.214103942	0.246534887	0.478704487
E07000167	2010	0.493995443	0.569645158	0.598810949	0.311946132	0.174420484	0.192039116	0.640543271	1.575731608	0.282769526	0.386882581	0.248176224	0.305007889	0.38852356	0.731314928	0.735643141	0.235492186	0.854282626	0.016445474	0.091904268	0.856703817	0.926003856	0.883808722	1.145866227	0.347274104	0.488751284	0.373561658	0.142649897	0.836777396	0.069710277	2.147789996	0.042177194	0.240109832	0.230093319	0.874599698	0.588942295	0.21829538	1.645770469	0.495475151	0.302956527	0.073897956	0.318181663	0.114542927	0.361285119	0.714226835	0.318415687	0.222302803	0.260577847	0.485199878
E07000168	2010	0.473012214	0.559677132	0.582189784	0.302042886	0.1694933	0.185627285	0.623478742	1.628633766	0.274038556	0.371131823	0.245080652	0.29076525	0.375522087	0.734182874	0.713178221	0.23207649	0.824514263	0.01570379	0.091626211	0.833392951	0.899454453	0.854774471	1.118952407	0.336608618	0.473718316	0.356319657	0.13795615	0.786692891	0.071454255	2.096424119	0.041547882	0.231431832	0.225310016	0.849021131	0.577508113	0.214873485	1.487838228	0.465201428	0.296717861	0.073160758	0.307952428	0.113057703	0.349674446	0.71378769	0.309336845	0.216470025	0.249696809	0.468047678
E07000169	2010	0.473373717	0.573032237	0.581581542	0.301563278	0.167251547	0.176367241	0.629681975	1.539728556	0.268089039	0.373025837	0.223565707	0.283666328	0.391882127	0.744227667	0.730296398	0.229844393	0.828136017	0.016561044	0.094244472	0.818136614	0.899193888	0.823199151	1.100846852	0.316611912	0.468776574	0.360934973	0.138845513	0.783840259	0.068426913	2.02936756	0.042482076	0.232666553	0.21493342	0.859066322	0.583570947	0.208200884	1.657916446	0.461168892	0.285388849	0.08081442	0.285544886	0.104009755	0.337153524	0.651413805	0.328131774	0.214507439	0.247379482	0.486476247
E07000170	2010	0.451331155	0.562492244	0.571613304	0.302371856	0.155287714	0.172905804	0.596470698	1.758352493	0.274318174	0.373683592	0.237548382	0.281955795	0.364999308	0.774588294	0.721103933	0.23417552	0.828542603	0.015570344	0.091393543	0.827199708	0.909198633	0.830852015	1.119423613	0.323064968	0.455344688	0.361635355	0.134178519	0.764712025	0.067400737	2.100241099	0.044365161	0.225819486	0.213048415	0.855875292	0.60808868	0.203545183	1.453960166	0.453753863	0.285343665	0.090683167	0.296491604	0.109627167	0.311221752	0.686264088	0.334202143	0.202088139	0.231695259	0.475340103
E07000171	2010	0.474962199	0.580687274	0.590047847	0.311730229	0.163255726	0.180829871	0.62900885	1.698138338	0.277447681	0.384438072	0.240799498	0.288035818	0.382765751	0.776139299	0.743702322	0.236886767	0.847081785	0.016779938	0.095714659	0.843367375	0.92503105	0.857077892	1.140722581	0.333521527	0.477044402	0.368473529	0.139702283	0.791138545	0.069266115	2.137639495	0.045233621	0.23546984	0.220730806	0.873457787	0.61021394	0.213083458	1.579103786	0.471574449	0.295472336	0.086663417	0.307486273	0.109285519	0.335048446	0.702912857	0.336671197	0.213937042	0.245041563	0.485671428
E07000172	2010	0.474891834	0.575335689	0.592557468	0.298963026	0.176451025	0.178767541	0.645201746	1.57159465	0.268356641	0.372748423	0.227277028	0.281574871	0.398067694	0.75514496	0.724270521	0.232730491	0.818343444	0.016092119	0.098623109	0.820969491	0.909476795	0.828594085	1.10555946	0.318626866	0.46774897	0.354940476	0.141953816	0.770812296	0.075476725	2.009761478	0.043019769	0.235820481	0.217492698	0.870629194	0.581898131	0.215525908	1.573638413	0.45132327	0.293413041	0.075762112	0.2869805	0.107001268	0.347147172	0.665022758	0.321752403	0.221210934	0.252042474	0.488779334
E07000173	2010	0.474453214	0.569585913	0.584353562	0.304717619	0.167307979	0.179512298	0.628797301	1.596153385	0.274893461	0.378637737	0.233681451	0.280518496	0.385042196	0.761428016	0.730311605	0.232647055	0.82921933	0.016358251	0.094861465	0.833429253	0.916337089	0.84321839	1.120292165	0.324613085	0.468948688	0.359753087	0.140260568	0.777925199	0.071445251	2.076433594	0.044352937	0.235090451	0.216827377	0.869172746	0.596095311	0.213517725	1.554077295	0.461560085	0.292880571	0.079221049	0.297317736	0.107061027	0.334397795	0.687171194	0.327885481	0.216105654	0.244293598	0.485358941
E07000174	2010	0.454882816	0.56589607	0.572057102	0.303884048	0.155614439	0.173084271	0.595152065	1.806108729	0.275729935	0.372935384	0.240751724	0.282594947	0.36261174	0.782953981	0.724234979	0.235302065	0.831002382	0.015538088	0.092375163	0.830154363	0.910658084	0.837155802	1.13047196	0.326781698	0.458221865	0.362772235	0.132738435	0.767857864	0.066373092	2.123645596	0.045572341	0.2275629	0.213097125	0.8501875	0.614582791	0.205442634	1.444937156	0.454981167	0.286464889	0.094632295	0.298313235	0.110770183	0.310975769	0.682817193	0.336371883	0.200692547	0.230991695	0.479002849
E07000175	2010	0.479873917	0.572572066	0.591321651	0.304701573	0.171377858	0.18208483	0.632262658	1.625541384	0.277452455	0.38072201	0.238289333	0.290408473	0.386049058	0.760979216	0.730018151	0.236675238	0.841177181	0.016378504	0.094620991	0.840210784	0.921430937	0.852785388	1.128176809	0.33095983	0.472077204	0.36551699	0.14131466	0.792370351	0.071995913	2.0888941	0.043942539	0.235469243	0.220837528	0.873102893	0.596085733	0.213742398	1.566584225	0.466913899	0.294107273	0.080278087	0.301833077	0.110692954	0.340761423	0.686301271	0.327390811	0.217313944	0.249227857	0.487281745
E07000176	2010	0.490765955	0.574594944	0.595173485	0.303127867	0.180974743	0.180038469	0.65421551	1.459083846	0.270321113	0.37958825	0.226018632	0.279919643	0.403468535	0.74693568	0.736033905	0.233760212	0.829655129	0.016640303	0.09798145	0.826984302	0.916022976	0.831299412	1.101921721	0.317958968	0.470836188	0.358310635	0.14613899	0.775982794	0.075621016	2.008161845	0.043943661	0.237068496	0.215859097	0.862464991	0.574753555	0.216359747	1.676668099	0.449491837	0.292643917	0.077703649	0.283762354	0.104513854	0.356012152	0.648921176	0.321884034	0.222712038	0.257669183	0.497152466
E07000177	2010	0.480932399	0.580110374	0.594620478	0.306797399	0.176284595	0.176901751	0.649569559	1.524439077	0.274001405	0.381367942	0.222124088	0.276705445	0.404114659	0.767168534	0.736050799	0.233477593	0.8281457	0.016163721	0.099110115	0.828008677	0.92170679	0.817096561	1.104536037	0.310880314	0.467878762	0.357133608	0.145327486	0.775069189	0.07539195	1.997863797	0.044283923	0.237278504	0.212085924	0.87627476	0.587036312	0.214659294	1.646410249	0.444469667	0.290875012	0.08790299	0.276772057	0.102639639	0.342407135	0.646251943	0.332067084	0.219806888	0.253002181	0.503557508
E07000178	2010	0.415284857	0.546432741	0.54320351	0.266634499	0.163821271	0.149589573	0.606930151	1.685905298	0.24909982	0.343642878	0.202137948	0.238582153	0.371677046	0.776444735	0.675108328	0.212487803	0.738483557	0.013738178	0.099772685	0.738979338	0.867392379	0.708481827	1.016189979	0.269650424	0.409936084	0.315110956	0.129916509	0.6431472	0.083680623	1.789077449	0.044138627	0.212884047	0.193614383	0.805388392	0.567543187	0.204146429	1.267675056	0.35421122	0.272646411	0.096901692	0.23772562	0.09827984	0.300611959	0.594182157	0.311427513	0.197071265	0.223457274	0.472161728
E07000179	2010	0.515533896	0.593416396	0.615692504	0.316679639	0.187975278	0.187119604	0.677301249	1.459227971	0.282734971	0.398125278	0.230906723	0.290847626	0.420557711	0.767152625	0.771635406	0.240274865	0.864552653	0.017893949	0.098157557	0.862467934	0.94926855	0.858530619	1.137221314	0.328029859	0.490891837	0.373853563	0.154940826	0.809921223	0.075050404	2.076877568	0.045116602	0.244510274	0.220555026	0.890388217	0.592799854	0.221626113	1.844623257	0.471633611	0.301508862	0.078423404	0.293642357	0.105323186	0.365385969	0.676932811	0.338467688	0.22944707	0.268792877	0.517835001
E07000180	2010	0.501858448	0.593637752	0.609722852	0.319395802	0.180826283	0.185918866	0.669877562	1.524023356	0.281015584	0.39456356	0.231509436	0.287584557	0.413841978	0.778479482	0.759680023	0.239915223	0.86168073	0.017544052	0.100185087	0.852238443	0.94454613	0.857306653	1.140930555	0.32829703	0.485422507	0.370568589	0.14717614	0.808316871	0.075974695	2.07900976	0.045245771	0.244024819	0.223541495	0.884078411	0.595756434	0.222433108	1.72579248	0.468582575	0.301991294	0.084965738	0.292094464	0.107646021	0.364036629	0.682450179	0.33421087	0.228291497	0.263831241	0.515551281
E07000181	2010	0.510839465	0.598456793	0.614460456	0.31997173	0.182273311	0.186608879	0.673775115	1.507391003	0.284533492	0.39666685	0.233893717	0.291035374	0.418872515	0.77610211	0.768598497	0.241851392	0.868688268	0.017476571	0.09871688	0.866536308	0.951496205	0.865182747	1.145123281	0.330159948	0.494047495	0.374578873	0.151222252	0.818299852	0.074692739	2.103906595	0.045311126	0.244184358	0.223403338	0.888547468	0.599205778	0.222391896	1.795867123	0.476563742	0.302159957	0.078348405	0.293592766	0.106482762	0.363257417	0.686304336	0.34092065	0.227931722	0.267494052	0.51704782
E07000187	2010	0.489740146	0.580283993	0.597023993	0.312785928	0.174835998	0.184961211	0.648369214	1.555126074	0.280358913	0.389750439	0.233356959	0.294163989	0.398516612	0.757517582	0.751060897	0.237169154	0.850596669	0.016943912	0.094584333	0.850305764	0.929076684	0.861542909	1.129971843	0.331899752	0.484416864	0.369510522	0.142543045	0.81506214	0.069475874	2.100601168	0.04260486	0.23905075	0.224804921	0.874131581	0.593728097	0.21729596	1.693916366	0.482738771	0.298767693	0.077396822	0.300854359	0.107263015	0.354152325	0.69778079	0.330682803	0.223096158	0.257170326	0.501281984
E07000188	2010	0.476156774	0.570611644	0.589993592	0.309990176	0.166246081	0.183985604	0.624222764	1.673127069	0.280350237	0.380504647	0.244805522	0.293018792	0.380527232	0.759965969	0.735743636	0.238295794	0.842936717	0.016488733	0.09276832	0.842743347	0.921234259	0.859508811	1.137194686	0.338033343	0.475362934	0.36601577	0.139275731	0.795118592	0.070476252	2.124320702	0.043327835	0.233854686	0.224192354	0.862061671	0.598689861	0.213521219	1.537077397	0.471167802	0.295895097	0.084320131	0.308397424	0.113466454	0.343784178	0.700162892	0.3235617	0.21443275	0.249484346	0.481800825
E07000189	2010	0.490142629	0.5736874	0.592252861	0.314726414	0.169221101	0.18793185	0.633360113	1.658488774	0.282509462	0.386732653	0.245467287	0.297221158	0.38577929	0.755367757	0.744031457	0.237067397	0.853543779	0.016526269	0.092375588	0.855639572	0.923324755	0.871576011	1.144211059	0.341150113	0.484349642	0.371438179	0.140733917	0.820294391	0.068523309	2.148036326	0.043754387	0.23752106	0.227215111	0.866463967	0.599240136	0.216251615	1.6097204	0.482380903	0.300288693	0.083926365	0.311558518	0.112203348	0.35345434	0.711943369	0.327627421	0.217921089	0.254518127	0.489586371
E07000190	2010	0.481148946	0.57235049	0.589034021	0.311759101	0.167323008	0.182992417	0.630343422	1.618016989	0.278742808	0.385397817	0.237031142	0.290578705	0.386364273	0.753487837	0.743653935	0.23703992	0.841815767	0.016124764	0.092855159	0.845048457	0.922950218	0.855736256	1.125657218	0.331776634	0.476809637	0.36778209	0.140511377	0.800009354	0.06810374	2.114760347	0.04358699	0.235910719	0.221476395	0.863517449	0.596137397	0.214051764	1.581764875	0.474581146	0.296375769	0.081096131	0.300744138	0.109337118	0.343415177	0.691886792	0.328905663	0.215873347	0.249960021	0.488335222
E07000191	2010	0.549724879	0.579493547	0.632797498	0.325275305	0.205966462	0.210932496	0.698156936	1.500001311	0.293690199	0.399086579	0.254729593	0.33035827	0.425221313	0.729838794	0.760330433	0.249660479	0.895119648	0.018222232	0.094608988	0.899912609	0.943466253	0.935385971	1.185117488	0.367414484	0.531599939	0.388964822	0.154840633	0.909594903	0.074019669	2.199702248	0.040663093	0.250426529	0.246871927	0.915759492	0.586840066	0.234186994	1.843567665	0.538434763	0.322096306	0.061730522	0.333885598	0.119412831	0.41336207	0.761499627	0.313160775	0.24653809	0.290467263	0.509140968
E07000192	2010	0.462631688	0.573862713	0.580948883	0.30440502	0.167041305	0.173238065	0.621856981	1.687479571	0.272427079	0.380115877	0.226736052	0.277958996	0.382598915	0.777548795	0.733332156	0.230417247	0.828289643	0.015521416	0.095498989	0.835539523	0.915189542	0.830492959	1.112310067	0.317006413	0.462916611	0.360433126	0.139958731	0.781775964	0.068941986	2.059623815	0.043641176	0.232044372	0.209793363	0.867915364	0.605422899	0.208389778	1.556815049	0.458414969	0.289135539	0.082990793	0.287777023	0.103599426	0.321125772	0.685429993	0.335716453	0.210563754	0.241363536	0.490333789
E07000193	2010	0.459824774	0.558153009	0.575379103	0.297345014	0.165907422	0.173113692	0.619775272	1.627849541	0.27082056	0.372515101	0.226663326	0.275597751	0.378277579	0.763978733	0.712794003	0.228456308	0.807833061	0.015391642	0.096034743	0.815398528	0.904821281	0.813447941	1.096479143	0.311801814	0.456751084	0.35088874	0.137992155	0.762995298	0.070760459	2.003919715	0.043195611	0.230968895	0.210332795	0.861718575	0.585460662	0.209797675	1.512871551	0.443541497	0.286162546	0.088237511	0.283648088	0.105775026	0.329574366	0.657934396	0.321662316	0.21275496	0.238987769	0.487343452
E07000194	2010	0.51000089	0.597537508	0.616190823	0.314231189	0.183957381	0.189504443	0.670379568	1.556699785	0.283284697	0.388509011	0.236152652	0.30520655	0.417927901	0.765760852	0.755322893	0.241372668	0.871454366	0.017328905	0.098249746	0.859634887	0.936913048	0.868605808	1.150357879	0.336197161	0.496373012	0.377216339	0.15010249	0.843137919	0.073871962	2.105993465	0.043456837	0.244879624	0.226500254	0.898695658	0.597973578	0.219906367	1.781396086	0.488501823	0.302806669	0.077323149	0.301421212	0.109831629	0.372076966	0.690626451	0.334457932	0.227954852	0.268704405	0.507240069
E07000195	2010	0.472593678	0.58219977	0.588068687	0.310482188	0.163415131	0.180418908	0.623256694	1.799274193	0.278594611	0.382741959	0.24285211	0.291627006	0.378868128	0.789071393	0.745197526	0.236909454	0.849302284	0.016359376	0.096069185	0.845073101	0.9246342	0.8525929	1.145505748	0.333286749	0.474203101	0.369109269	0.13939256	0.791542958	0.070367364	2.149983924	0.045812908	0.234809451	0.222256393	0.871295792	0.614461837	0.213444128	1.515277809	0.465389834	0.296272602	0.090349977	0.306140794	0.113080329	0.333595331	0.70230513	0.337102501	0.21157633	0.243619775	0.487713646
E07000196	2010	0.50184987	0.595907709	0.611116843	0.314161981	0.176877238	0.191073192	0.658285232	1.62574102	0.283874945	0.391016266	0.243833283	0.3018656	0.405996434	0.770563289	0.764481584	0.243614207	0.866309222	0.017995296	0.09665255	0.861706232	0.945391197	0.884929944	1.162036389	0.344190723	0.494397843	0.376397621	0.146898897	0.831321466	0.072546721	2.15479363	0.044205235	0.245128382	0.232692229	0.892502069	0.608493241	0.221067535	1.68531535	0.493403894	0.304204534	0.074266728	0.314264811	0.11353934	0.362026489	0.708991768	0.33275588	0.22656516	0.263235093	0.500957618
E07000197	2010	0.481242298	0.581577277	0.595735365	0.305253459	0.173592556	0.184157865	0.642292284	1.624865699	0.277661335	0.381760562	0.236787548	0.294146578	0.395848797	0.761655301	0.739660278	0.236366534	0.841533184	0.016357507	0.096000357	0.839809089	0.922627803	0.850373306	1.130876401	0.331498766	0.478876963	0.366293165	0.143687961	0.80707238	0.072850711	2.085417342	0.042862243	0.238183758	0.223657735	0.878086456	0.59333273	0.215022366	1.618620336	0.472002272	0.297424889	0.079295217	0.300946668	0.110796581	0.350861051	0.693301905	0.328480823	0.220437139	0.254526567	0.492289216
E07000198	2010	0.504018173	0.598388416	0.612101216	0.317500485	0.17902944	0.191481086	0.659419278	1.66436873	0.284984431	0.39331173	0.246469154	0.308834511	0.404607291	0.775166677	0.760508003	0.244569972	0.87741077	0.017476097	0.096663678	0.871708782	0.947603407	0.896673763	1.172178372	0.347344148	0.497870261	0.380993617	0.146295022	0.843746748	0.071061721	2.182690324	0.044465676	0.246534286	0.234019758	0.895156474	0.613531069	0.221999188	1.711665511	0.502837811	0.307024558	0.079061691	0.318201669	0.114001366	0.366452408	0.717222595	0.334491901	0.226148555	0.266799922	0.506381046
E07000199	2010	0.445557074	0.566587733	0.565927401	0.299360479	0.151037861	0.168307089	0.591955631	1.730832796	0.276492007	0.371286122	0.233974335	0.27379731	0.361751751	0.787742337	0.725711402	0.236239191	0.823831819	0.015371345	0.091914652	0.82170192	0.908736461	0.820879598	1.115634981	0.317934004	0.448816822	0.361225732	0.132697535	0.747966824	0.065962202	2.083345892	0.046188746	0.224488618	0.207553137	0.842735926	0.610944159	0.201722861	1.444980826	0.449530808	0.284528622	0.089939257	0.286733728	0.107358953	0.30016289	0.670141873	0.337124908	0.197049164	0.229830749	0.475842136
E07000200	2010	0.503253405	0.587601733	0.610072441	0.314085214	0.18138568	0.191459413	0.658905107	1.603428196	0.284907089	0.394175973	0.247480661	0.303437795	0.404570615	0.759567551	0.748362155	0.243693724	0.869177829	0.016956255	0.095937248	0.871377176	0.9414529	0.889186942	1.159469835	0.346856587	0.494848337	0.375945496	0.146628027	0.84223276	0.072531232	2.156161458	0.04353819	0.244946197	0.231367728	0.893723418	0.601934095	0.222158706	1.677857796	0.48948976	0.307311838	0.077177433	0.310748514	0.113893243	0.370410882	0.713837283	0.328096469	0.226821053	0.264630641	0.500785025
E07000201	2010	0.451371086	0.544912974	0.566436635	0.29705246	0.164615333	0.171089474	0.604555412	1.629616547	0.269611253	0.365797145	0.222227286	0.272012539	0.375075852	0.741725059	0.697424693	0.22122333	0.792710138	0.014484942	0.090977463	0.800225823	0.887661881	0.793304012	1.074807142	0.307331326	0.447459119	0.342576353	0.133097779	0.754830918	0.070411179	1.961615692	0.041252139	0.223636102	0.206777371	0.847429248	0.569770243	0.204545374	1.460296965	0.434856608	0.280078533	0.089685583	0.275163944	0.10343335	0.319212439	0.643140845	0.321353437	0.206542828	0.240207189	0.481890969
E07000202	2010	0.429598657	0.54427698	0.551090296	0.288996083	0.155555266	0.162245058	0.589993178	1.687506772	0.263356438	0.36078537	0.223933132	0.255425079	0.359193618	0.768255058	0.692005026	0.221290246	0.77542734	0.014432695	0.095452103	0.787554863	0.885828135	0.777330036	1.067597516	0.298653309	0.435142478	0.335233235	0.129122513	0.711781641	0.070956177	1.95216695	0.043523484	0.220551682	0.201605896	0.824284727	0.579513013	0.202904679	1.360921135	0.412708823	0.278185752	0.096795349	0.267144493	0.104348231	0.304759689	0.642186162	0.321318889	0.199752226	0.224203475	0.47487724
E07000203	2010	0.509208589	0.585232414	0.610762323	0.31269316	0.186125151	0.191691708	0.668799527	1.533942566	0.287497427	0.389700806	0.237303114	0.309429945	0.412986926	0.763580197	0.749514633	0.242311205	0.86746725	0.01604526	0.096325158	0.870212742	0.945261163	0.875491976	1.148367783	0.337962455	0.494266186	0.380381242	0.14767215	0.848803826	0.073494771	2.095024696	0.042411645	0.244402819	0.226932725	0.910638097	0.59411667	0.222626702	1.717583548	0.494078516	0.304770056	0.073340217	0.306042042	0.110903302	0.369540826	0.693574308	0.326758601	0.230680811	0.266633645	0.512561328
E07000204	2010	0.481294376	0.578051886	0.590201552	0.310524488	0.168216247	0.181641679	0.63057359	1.702921597	0.279606798	0.383924805	0.239823244	0.290385229	0.384690603	0.777827211	0.742379141	0.237055438	0.847994533	0.016377852	0.095069469	0.846552219	0.927727964	0.851846329	1.137553271	0.331989324	0.472965931	0.366449047	0.140030146	0.797816558	0.070910158	2.105884624	0.045390394	0.236461635	0.220668625	0.866682286	0.605398954	0.215446379	1.545365012	0.465558189	0.296454437	0.092442285	0.2999841	0.110810478	0.343839253	0.685217538	0.331482142	0.214438038	0.250269478	0.493963339
E07000205	2010	0.517455356	0.594221157	0.617801916	0.322104094	0.182819246	0.196371366	0.66872048	1.59246868	0.288521846	0.399176793	0.251227517	0.309534076	0.406769735	0.764797199	0.765941276	0.247068166	0.878644471	0.017329558	0.097719568	0.880102894	0.953743581	0.90512874	1.175412291	0.353756022	0.503462477	0.382951946	0.14839991	0.849907113	0.072699095	2.18947635	0.044153658	0.249417163	0.236767673	0.893924344	0.607290413	0.227105318	1.700118381	0.499519082	0.311392333	0.080464671	0.319793697	0.115915983	0.379964235	0.718752338	0.32952187	0.230665849	0.269402007	0.505443642
E07000206	2010	0.499402345	0.581776676	0.597474726	0.320833633	0.171729998	0.192164491	0.634959318	1.692162548	0.288588551	0.391166175	0.256015691	0.301445226	0.384673853	0.764247703	0.750419387	0.242491034	0.865288177	0.017079974	0.092462782	0.868246714	0.934411521	0.891064283	1.169921783	0.353246475	0.492058014	0.374337595	0.142726492	0.825615654	0.069612647	2.202661401	0.044536456	0.240863813	0.232480461	0.867127545	0.609242274	0.220390402	1.563191542	0.489593692	0.306183843	0.086051634	0.322237323	0.116629257	0.359784517	0.732794748	0.326150927	0.219113151	0.257581243	0.487248414
E07000207	2010	0.506610499	0.587702099	0.612657884	0.309642781	0.200682263	0.183502013	0.687086911	1.376126399	0.272890444	0.389661746	0.219143391	0.277050201	0.426173987	0.75310055	0.752938532	0.23848346	0.833820768	0.016818224	0.103715378	0.837262408	0.934888098	0.819901357	1.099515113	0.309442135	0.472716316	0.358584218	0.154969319	0.765801981	0.082252263	1.957256022	0.044942455	0.240411665	0.213018385	0.880345215	0.568744058	0.222999783	1.751556224	0.42976338	0.295563669	0.083737827	0.270122013	0.103388037	0.372986649	0.626742391	0.326512219	0.2308038	0.26912959	0.522970538
E07000208	2010	0.497668953	0.577258106	0.604101831	0.299365885	0.197062989	0.182338607	0.680377043	1.388344979	0.270524141	0.379618229	0.218345106	0.272447791	0.42030792	0.758298321	0.735409286	0.232902375	0.816063788	0.016209861	0.10255523	0.825603921	0.923211053	0.81590507	1.093355881	0.306246674	0.467356106	0.350085767	0.153121807	0.761630172	0.082537329	1.91347207	0.043739819	0.239869124	0.211869478	0.888810832	0.564484968	0.223431758	1.639476211	0.430513408	0.296017183	0.07741313	0.269531844	0.103017548	0.368020169	0.630588088	0.316347148	0.233232605	0.264339843	0.513812592
E07000209	2010	0.499269118	0.599213904	0.607334285	0.313395067	0.182511299	0.178637418	0.670544376	1.546456131	0.27116509	0.384192758	0.219472497	0.283665067	0.422577299	0.768137285	0.762062128	0.235327313	0.853539404	0.017388219	0.102095122	0.831839212	0.919446061	0.82089967	1.110965783	0.310294932	0.482199636	0.366172168	0.150932192	0.779471623	0.07491211	2.025413606	0.045783701	0.239564888	0.216401862	0.86469444	0.58629089	0.217925383	1.808527068	0.447914344	0.293623816	0.085111325	0.27447205	0.101396039	0.362705973	0.645591048	0.341893342	0.222497257	0.264633387	0.516309681
E07000210	2010	0.529147463	0.605471253	0.628198553	0.326272382	0.194893385	0.19578028	0.69426026	1.498621159	0.287713714	0.401314511	0.237654645	0.308327556	0.433537554	0.765498736	0.781420791	0.249313599	0.887736016	0.018357107	0.100903329	0.872932641	0.957109455	0.884134187	1.160473192	0.338062285	0.503733376	0.381233206	0.154617675	0.840289948	0.07723401	2.133941905	0.04579813	0.250197973	0.232908061	0.893737836	0.59503409	0.227926874	1.884207004	0.485412928	0.307285477	0.080445923	0.302662927	0.110781163	0.394989207	0.689327475	0.33897373	0.236466569	0.27951974	0.527130252
E07000211	2010	0.497158491	0.592049574	0.607185323	0.308528946	0.191071014	0.180222104	0.676958962	1.404081223	0.270254255	0.380690264	0.216753878	0.275067568	0.424974854	0.755401208	0.741350465	0.23519568	0.828130607	0.017110806	0.103036554	0.82133265	0.923455566	0.810652954	1.09493316	0.305501807	0.476647457	0.355473081	0.150962866	0.772399516	0.08103185	1.95679191	0.043752171	0.241246681	0.215864508	0.87734729	0.570463341	0.220664851	1.741562907	0.438440605	0.292909565	0.081330925	0.270388248	0.10223623	0.368108024	0.629763065	0.327273393	0.229408825	0.265789568	0.515753167
E07000212	2010	0.493578608	0.595639357	0.606781777	0.316781874	0.179505486	0.180549642	0.660754633	1.568962719	0.27391464	0.386426281	0.225111152	0.285749256	0.415441631	0.765881495	0.761876911	0.236309397	0.855130028	0.017924122	0.100499657	0.837391916	0.925003484	0.82797768	1.12090115	0.31636847	0.483416114	0.364370477	0.149442666	0.784099027	0.074916706	2.063324528	0.044519732	0.236664176	0.21924346	0.862097219	0.588278881	0.216500744	1.785141952	0.451407498	0.292689605	0.089020564	0.280218538	0.104990706	0.358211085	0.656277105	0.340744515	0.221063099	0.261498127	0.511956387
E07000213	2010	0.492856504	0.591674249	0.605819733	0.298836314	0.19649656	0.179605661	0.681393299	1.407739389	0.263092525	0.373813676	0.215265775	0.267298484	0.42541883	0.754252268	0.731215524	0.233364952	0.806854702	0.016904382	0.106672236	0.810654119	0.914179488	0.802507768	1.089654611	0.303874384	0.471909169	0.34531781	0.152463888	0.752622763	0.086298617	1.925580678	0.042654633	0.240190271	0.216778575	0.882235552	0.564640422	0.224204512	1.653740138	0.427525046	0.296299723	0.077091385	0.271239546	0.102604595	0.366378082	0.63635926	0.316816641	0.233700836	0.264912322	0.504358605
E07000214	2010	0.507100706	0.600137112	0.617603934	0.308519566	0.199291788	0.183481385	0.690451719	1.468216192	0.273197893	0.388528205	0.222380042	0.282607017	0.429783773	0.77345188	0.759265011	0.239520345	0.842093326	0.017635155	0.10461771	0.836767281	0.939977284	0.829775067	1.115246199	0.315159954	0.47946518	0.36112075	0.155698574	0.781242923	0.083189243	1.989362668	0.045198871	0.243724487	0.218510187	0.891701489	0.581184269	0.224348043	1.771490234	0.444285024	0.298232426	0.084290919	0.279274555	0.104632404	0.374210632	0.64592285	0.331442563	0.232620333	0.27117877	0.522814584
E07000215	2010	0.515668785	0.599077056	0.618911097	0.316275693	0.191871768	0.188498638	0.687961859	1.464456244	0.280423854	0.394850651	0.227570745	0.29442738	0.427903375	0.770004327	0.76519556	0.243290351	0.86229001	0.017494281	0.102485039	0.857758732	0.948884072	0.857268376	1.135301955	0.325892328	0.493259126	0.374313843	0.151654953	0.819788395	0.077390752	2.060600236	0.044131832	0.247797736	0.225182356	0.90212751	0.591968271	0.225374307	1.782540326	0.473187967	0.303385716	0.078832548	0.291288484	0.106365807	0.376986143	0.664594389	0.332586658	0.234847004	0.26963902	0.523715795
E07000216	2010	0.525184864	0.600057913	0.627136667	0.32041789	0.194118764	0.192807118	0.692065247	1.472132006	0.282793479	0.400333437	0.234773182	0.298416331	0.428317561	0.763149007	0.776942728	0.244696354	0.874685338	0.018238618	0.100835124	0.865136073	0.952637779	0.866676708	1.147538225	0.331840277	0.496014546	0.377062097	0.154804426	0.821389067	0.078544106	2.098291412	0.044945312	0.248783729	0.226102607	0.889311268	0.591434951	0.226353032	1.852969622	0.4678083	0.305396206	0.083095264	0.297228646	0.108053802	0.385757807	0.671211068	0.338075752	0.234188473	0.274761047	0.523698186
E07000217	2010	0.47215193	0.578767075	0.593407008	0.303447428	0.181612697	0.173558187	0.65395756	1.562074349	0.269016585	0.379177634	0.221329601	0.268423792	0.40247114	0.778202163	0.737206408	0.232443607	0.816812002	0.016032471	0.102143859	0.816140361	0.926216366	0.79883797	1.098711275	0.305934318	0.454875247	0.347845072	0.145359031	0.739609513	0.081331004	1.957601493	0.045071154	0.23516189	0.209849042	0.867030255	0.585798542	0.21765871	1.566811145	0.415718958	0.289890872	0.099904671	0.269075903	0.105343508	0.343432698	0.630898304	0.326837003	0.219002028	0.251509296	0.507821498
E07000218	2010	0.484115328	0.590911693	0.601586017	0.3116425	0.172193314	0.182863951	0.645366202	1.661994681	0.276960815	0.385683496	0.238086127	0.29439086	0.397592724	0.777420181	0.748263685	0.238767319	0.854551413	0.016888342	0.097767667	0.849464042	0.932693102	0.85851808	1.142924498	0.332279099	0.482572271	0.369593747	0.142729681	0.800996596	0.072628128	2.126301013	0.044682588	0.238890915	0.223413926	0.888177008	0.6071188	0.216255785	1.651584907	0.474080462	0.299301872	0.082817736	0.303420664	0.109918693	0.346828985	0.700186108	0.334685912	0.220213472	0.252638752	0.4957442
E07000219	2010	0.457212795	0.563633073	0.573835091	0.297141767	0.164931223	0.173346564	0.612957994	1.643067119	0.270451585	0.371136899	0.230237317	0.273608173	0.375220668	0.767137549	0.716361802	0.228903677	0.806393084	0.015475327	0.095254048	0.816144243	0.905289812	0.819207471	1.103490849	0.317595624	0.454439242	0.349134161	0.136822376	0.759847034	0.071797672	2.018968173	0.043570406	0.230177697	0.212129529	0.859582783	0.589562779	0.208981246	1.475917237	0.443276662	0.287039419	0.088754085	0.283915953	0.106777674	0.321536143	0.666188976	0.323782833	0.208873506	0.23869601	0.480880633
E07000220	2010	0.464559021	0.568842885	0.579652933	0.294756512	0.173330635	0.175388271	0.631978954	1.522203558	0.266519486	0.368098277	0.224724871	0.269264575	0.389526129	0.759777792	0.714225603	0.229986968	0.802328987	0.016302098	0.098668825	0.804577133	0.901915927	0.804902934	1.09371095	0.31092435	0.455645755	0.343760586	0.140642204	0.748264793	0.079179757	1.968087929	0.042910956	0.232428099	0.212421532	0.859409915	0.574422203	0.213138652	1.518388893	0.42914231	0.287019258	0.084921031	0.276554236	0.10622734	0.33711658	0.648506055	0.316292624	0.216105282	0.245384525	0.48362052
E07000221	2010	0.521931012	0.595929617	0.620040535	0.319716116	0.187237145	0.194636946	0.678121596	1.559060704	0.28736955	0.397387683	0.245807365	0.305308937	0.415217377	0.766478758	0.766850087	0.244725091	0.880687977	0.017742764	0.098774676	0.878498785	0.952491754	0.894730685	1.167531278	0.346345456	0.500202705	0.381112199	0.152081128	0.842861353	0.075331369	2.157491958	0.045700039	0.248669326	0.232678338	0.899182951	0.602217135	0.227034368	1.765103403	0.492225992	0.309067078	0.075806789	0.313269122	0.112628074	0.380313249	0.711381225	0.331901663	0.232728354	0.273199571	0.511532802
E07000222	2010	0.464160302	0.567603923	0.577154786	0.299650904	0.167065634	0.172309368	0.623988441	1.634916288	0.264818803	0.370707294	0.224054639	0.27136234	0.387071954	0.751773478	0.72511129	0.229519717	0.821362784	0.016684355	0.09570986	0.810283398	0.895001242	0.80844928	1.092299998	0.309630567	0.458433902	0.352118891	0.139484945	0.747962084	0.071912294	2.023679248	0.043945969	0.228050983	0.211614683	0.830661724	0.582074432	0.207309706	1.600660128	0.434032861	0.284470556	0.081905749	0.278779296	0.103782277	0.33444496	0.663831549	0.328293073	0.2091778	0.243850314	0.484136636
E07000223	2010	0.495173921	0.58079835	0.604726172	0.321075229	0.173482716	0.189383643	0.645660229	1.692506559	0.284757645	0.397933956	0.254044647	0.293841896	0.388745815	0.776156476	0.754333322	0.242771618	0.853443497	0.016469914	0.096298633	0.873274491	0.953213055	0.89429585	1.169027795	0.345437607	0.490647796	0.369836981	0.143261961	0.806968551	0.072002483	2.194156693	0.04430942	0.245835615	0.231485951	0.892307617	0.622877562	0.225144714	1.532611628	0.478464767	0.308921256	0.087472918	0.321672951	0.114187591	0.349574726	0.719997173	0.335785281	0.222509338	0.249215929	0.498088194
E07000224	2010	0.521393036	0.591892415	0.624018891	0.327974545	0.185772335	0.201108399	0.673470962	1.632453657	0.292600484	0.402854765	0.259997392	0.309282053	0.407493648	0.767194017	0.766781757	0.246682671	0.877787457	0.017017222	0.09752749	0.890984356	0.962769469	0.91470863	1.188879305	0.360585436	0.51141571	0.378674919	0.149509436	0.851557097	0.07537693	2.225532429	0.043662002	0.250305647	0.241357706	0.904721395	0.608614251	0.233060653	1.630442229	0.498823432	0.319000768	0.080263571	0.327939015	0.119678577	0.386393688	0.748632949	0.32536449	0.235208986	0.273450453	0.503824956
E07000225	2010	0.535336652	0.597784531	0.628861837	0.332558616	0.189932415	0.202467721	0.68480251	1.582984153	0.297579288	0.40698616	0.254324729	0.313714887	0.420120165	0.769631945	0.781458359	0.249198492	0.899078303	0.017587317	0.096275504	0.902878291	0.968810393	0.913116367	1.188647265	0.357108272	0.517902558	0.38698758	0.151966509	0.867970676	0.074066743	2.221262892	0.043832868	0.250808254	0.241427885	0.908078077	0.607275583	0.232322051	1.768934416	0.50766295	0.317593081	0.076705836	0.322921678	0.116452126	0.392998746	0.742553591	0.333143896	0.238065122	0.279724846	0.522314296
E07000226	2010	0.437849869	0.560882447	0.57084035	0.286072976	0.1680772	0.161711118	0.62339845	1.593295684	0.258630174	0.361089613	0.21311855	0.250296129	0.380597502	0.780556235	0.690362352	0.222303099	0.76568788	0.014369933	0.103928932	0.777432383	0.897178449	0.753407056	1.059061593	0.287863348	0.435530667	0.329035289	0.13594402	0.70088609	0.07872114	1.865848055	0.043373173	0.226851161	0.200046248	0.855367031	0.573576491	0.209215314	1.390092478	0.392553713	0.281141984	0.102712519	0.253082584	0.102340746	0.318803224	0.599612763	0.319496614	0.209147845	0.232606726	0.49131977
E07000227	2010	0.517991479	0.606322548	0.626187329	0.323712221	0.187744783	0.194122881	0.682551526	1.550656018	0.292988311	0.40267561	0.242527529	0.308325493	0.424228982	0.780207874	0.77853226	0.24898435	0.891190475	0.017794512	0.099840692	0.882583214	0.969386689	0.889071774	1.173502578	0.34312472	0.503341402	0.383813885	0.151613054	0.842324684	0.076269898	2.15093567	0.045788413	0.249604007	0.232838344	0.905531867	0.607896683	0.226437608	1.789193318	0.491687985	0.308551812	0.079215366	0.306288549	0.113205978	0.379042027	0.696998822	0.341130639	0.23345531	0.273953058	0.528962319
E07000228	2010	0.514284941	0.59859855	0.614796206	0.31994656	0.183146914	0.186641836	0.671747065	1.516418806	0.284817889	0.397218518	0.233594045	0.294884184	0.417705773	0.772885625	0.770447334	0.243307381	0.871161339	0.017302722	0.099159403	0.864822838	0.948632951	0.862574094	1.146652566	0.329811897	0.491877401	0.378944164	0.150560776	0.81421591	0.073683657	2.108197706	0.045826068	0.245090006	0.223001237	0.888601274	0.600209809	0.221658999	1.794175459	0.472737296	0.301975035	0.083173895	0.294243039	0.106764302	0.364325439	0.673647433	0.342214835	0.226826804	0.266939293	0.52076368
E07000229	2010	0.493079443	0.582040763	0.602207497	0.316778404	0.175343293	0.184527823	0.650755116	1.636864976	0.282890651	0.392610211	0.241395815	0.285494813	0.396728089	0.774925003	0.749458895	0.239322595	0.847505489	0.016559742	0.098667334	0.859350869	0.943265478	0.862763026	1.147996983	0.331294566	0.485989773	0.367090945	0.144880887	0.795065264	0.074073965	2.134381953	0.04559565	0.242617279	0.224662687	0.883340104	0.608297212	0.221890061	1.591942849	0.465193713	0.301688231	0.087040072	0.301042973	0.110312357	0.349968316	0.694273059	0.334835618	0.222616063	0.25177299	0.504299823
E07000234	2010	0.506191757	0.592060326	0.611844181	0.315590825	0.182364998	0.188864788	0.664830374	1.590041892	0.278227078	0.390441659	0.240523917	0.295426984	0.406390393	0.772385781	0.757459321	0.240191355	0.86292145	0.017610958	0.099438134	0.861093063	0.942833603	0.87264544	1.150171209	0.337936745	0.489651811	0.370577925	0.148443973	0.813933482	0.075898184	2.118261272	0.045086613	0.244122616	0.225732274	0.885481131	0.601852586	0.222670753	1.69721961	0.471970246	0.303020182	0.086714221	0.302724386	0.111103138	0.36886265	0.688631397	0.330673767	0.226751559	0.263116227	0.50694739
E07000235	2010	0.52220428	0.593941634	0.621314214	0.323389114	0.186504045	0.201700416	0.67303385	1.594736404	0.295925442	0.399751376	0.253662567	0.321346878	0.412557863	0.757387989	0.764402793	0.244664456	0.893749901	0.017597462	0.095158737	0.889766674	0.956070987	0.911940006	1.181659638	0.359372869	0.51156672	0.383635144	0.148723799	0.876913068	0.07349159	2.195636824	0.04380931	0.247227439	0.240281473	0.900566257	0.599297048	0.226695906	1.763364481	0.514759508	0.313059173	0.073468116	0.323617466	0.118340498	0.38956778	0.740027045	0.327975017	0.234099577	0.276933869	0.515597805
E07000236	2010	0.44575083	0.554959032	0.56495924	0.296379595	0.156059642	0.16876668	0.601980861	1.647974074	0.269256284	0.369177043	0.226113298	0.265816426	0.367862188	0.768912006	0.704760163	0.2253807	0.804747563	0.015070261	0.092472376	0.812275152	0.900893235	0.811356803	1.093066482	0.31069333	0.444479441	0.35118784	0.135069384	0.74639963	0.068396583	2.009322813	0.044988957	0.226549421	0.205258793	0.850891924	0.593958272	0.20455042	1.461947885	0.441861912	0.283212448	0.089294778	0.279960733	0.103170389	0.307309663	0.666665801	0.326588776	0.202621557	0.229929724	0.479669077
E07000237	2010	0.448285989	0.565488942	0.566465774	0.299301566	0.157914749	0.166986426	0.60449387	1.689806053	0.266957928	0.368150005	0.223365973	0.268347336	0.37358947	0.768257969	0.724678121	0.228678034	0.813574872	0.015628141	0.093901789	0.806298839	0.897648871	0.799758593	1.095338298	0.305260219	0.44917716	0.354837434	0.1336418	0.737494763	0.067910103	2.023926961	0.045424434	0.225148958	0.206960082	0.830547107	0.595676115	0.203517095	1.510584708	0.432778154	0.279306991	0.091611233	0.275173565	0.103232979	0.311371233	0.649902491	0.335185863	0.20198639	0.231831016	0.484104687
E07000238	2010	0.510053418	0.585782736	0.609471437	0.312781857	0.181754349	0.191441468	0.663161354	1.581480083	0.283416952	0.390411003	0.241879966	0.305159339	0.407037891	0.760927188	0.755456429	0.241286085	0.866936639	0.016691198	0.097056698	0.867872519	0.939634659	0.882664532	1.156518964	0.342417314	0.498692305	0.377468961	0.147801632	0.843460228	0.072329463	2.135448439	0.043598108	0.246910003	0.229509043	0.901804843	0.601867897	0.22259964	1.704241634	0.491635815	0.306026982	0.07638071	0.31146423	0.111701672	0.367050534	0.708448633	0.328576695	0.228181793	0.26456017	0.503106049
E07000239	2010	0.486742994	0.576979375	0.597172887	0.31368795	0.16991507	0.186353868	0.636274487	1.711858238	0.282321514	0.386495194	0.246481024	0.297589491	0.38705954	0.76732547	0.740685611	0.24012744	0.855468652	0.016423889	0.093506219	0.856268168	0.933826991	0.880928171	1.155150441	0.341389163	0.481356983	0.374220311	0.141356531	0.812960383	0.069831042	2.166760511	0.045158514	0.239147031	0.22790508	0.880454421	0.611166054	0.217251541	1.578646756	0.484279981	0.301671819	0.082113104	0.316620836	0.113318408	0.346583442	0.721624223	0.330919372	0.218970639	0.250800808	0.490140038
E07000240	2010	0.483291806	0.570428024	0.590999611	0.297463404	0.190008261	0.174703653	0.662478953	1.448455021	0.261698468	0.377877843	0.213634399	0.269673266	0.41216141	0.746450908	0.739175304	0.233472426	0.818133822	0.016892937	0.102538896	0.809691551	0.902834632	0.789727774	1.070966536	0.300298338	0.451871181	0.347753996	0.143297752	0.744537816	0.079545619	1.941567503	0.04417619	0.232133717	0.204335174	0.842537364	0.564695167	0.212555553	1.770822104	0.414796664	0.283426814	0.086656606	0.261631494	0.098614538	0.355361131	0.629445817	0.323124947	0.219720482	0.254431914	0.503445466
E07000241	2010	0.45677172	0.555880281	0.565920973	0.283837108	0.17597701	0.164852609	0.634837081	1.442131864	0.251091936	0.357550719	0.203820775	0.250758377	0.391847878	0.742692366	0.70473728	0.222439621	0.765015335	0.015279224	0.101080833	0.767925665	0.873941217	0.75287741	1.035857357	0.284663607	0.434863871	0.333599451	0.140053244	0.696488314	0.078556562	1.835167497	0.041727568	0.225242531	0.201177276	0.825704632	0.55080867	0.212037916	1.47944673	0.395505946	0.277804092	0.082121809	0.255838752	0.096536418	0.332109537	0.599558784	0.309615386	0.214260907	0.240204973	0.482086146
E07000242	2010	0.501049183	0.601122451	0.609964894	0.318116755	0.181000248	0.180151118	0.67186591	1.518030635	0.274709056	0.394582359	0.222321055	0.282544362	0.421393985	0.774423528	0.771115593	0.241231574	0.865438425	0.018217211	0.101901307	0.846194856	0.935951818	0.83653629	1.12218129	0.315474215	0.483968649	0.369569418	0.150336002	0.788159878	0.074098288	2.064945634	0.046443608	0.241100085	0.215068035	0.869168546	0.596875957	0.216220883	1.845966359	0.456327069	0.29384428	0.085231634	0.279389167	0.100784141	0.357170324	0.650359792	0.349028749	0.222128699	0.260907262	0.52000187
E07000243	2010	0.452578023	0.567016457	0.575335778	0.291944508	0.170583725	0.165944027	0.62707776	1.522306094	0.260742588	0.364947344	0.210125789	0.259645514	0.390960391	0.760984903	0.706877776	0.224507486	0.783105297	0.014800239	0.100555894	0.788791798	0.888668845	0.767689741	1.06008676	0.28967932	0.452338468	0.341341806	0.13953532	0.7343443	0.073642817	1.895149318	0.041327848	0.227214112	0.202073253	0.859278978	0.567390883	0.20691778	1.547693417	0.418225729	0.279986889	0.086782458	0.257275507	0.098927954	0.326150151	0.6061289	0.321512517	0.2127733	0.237941308	0.496099127
E08000001	2010	0.420584525	0.525697445	0.542791888	0.268222155	0.161519599	0.161124481	0.588227885	1.542863493	0.252909062	0.344497394	0.215105066	0.250172444	0.352779562	0.738735017	0.664979711	0.217002341	0.734210148	0.013746666	0.096107323	0.757146899	0.858864782	0.751987693	1.028672809	0.29251836	0.416255075	0.317968599	0.130089036	0.675617389	0.078264451	1.831618444	0.041285789	0.218490177	0.196721061	0.82932183	0.553811948	0.203649684	1.233900042	0.383744999	0.271227822	0.090618713	0.263033292	0.102836411	0.295747472	0.605714782	0.295546919	0.199730254	0.220067523	0.445064897
E08000002	2010	0.449544548	0.552929069	0.565263714	0.289840765	0.166807627	0.168619785	0.611376315	1.531691926	0.262733148	0.36235594	0.217893482	0.266888795	0.377637068	0.74020993	0.703102265	0.226335574	0.789521533	0.015231302	0.0948981	0.791894882	0.883851701	0.788793382	1.065876567	0.303202938	0.445117347	0.342753601	0.136302012	0.73527186	0.071992079	1.939183442	0.042060969	0.224828685	0.205571473	0.836603438	0.568525924	0.204832655	1.484734875	0.427073445	0.278467445	0.084266746	0.271271972	0.102123357	0.320400916	0.62678392	0.316040151	0.207701413	0.235411284	0.475937926
E08000003	2010	0.350706327	0.47456358	0.479964382	0.218510869	0.148358694	0.129997427	0.539496158	1.490941181	0.221003375	0.290406525	0.178750951	0.2084587	0.323896117	0.721987193	0.576406712	0.190661963	0.603229665	0.01081052	0.096996086	0.635916694	0.771142228	0.601843375	0.894117649	0.231854684	0.348388216	0.259965222	0.117800193	0.539790396	0.08283597	1.480645766	0.037559551	0.19182366	0.166521888	0.745913307	0.490453373	0.182690217	0.941337861	0.286973977	0.239748565	0.096111501	0.198889351	0.092408748	0.256495668	0.49626872	0.263466081	0.177909074	0.192850524	0.416238465
E08000004	2010	0.414154776	0.512865688	0.531096496	0.266259678	0.159459888	0.157547602	0.579232938	1.473496418	0.249097457	0.337020542	0.205780857	0.243242957	0.349468699	0.725545659	0.657860116	0.212034222	0.716280379	0.012991486	0.094227957	0.73894007	0.838271676	0.728334898	1.001258066	0.281839022	0.406785714	0.311143851	0.127773692	0.661684078	0.076799453	1.768156143	0.039988912	0.215155802	0.190236784	0.817229171	0.541929116	0.200609157	1.217933602	0.371686036	0.264336855	0.093567163	0.254581109	0.0982519	0.2867538	0.580916349	0.289523424	0.197142715	0.214292328	0.437229065
E08000005	2010	0.417335643	0.524374608	0.53779398	0.26558378	0.163430738	0.159852564	0.589595917	1.487368759	0.24857257	0.341260127	0.20838152	0.245183963	0.356321657	0.733877411	0.665593218	0.214339872	0.722899355	0.013786202	0.097925344	0.743939626	0.846744971	0.735951134	1.011454762	0.285335554	0.413322923	0.31181885	0.128640904	0.665732291	0.07972571	1.786927064	0.040152587	0.217539164	0.194720148	0.828746797	0.545441352	0.203827992	1.226542091	0.37593973	0.268311291	0.089844286	0.256274455	0.100419768	0.293273675	0.588938872	0.29297356	0.200208055	0.219572688	0.441386587
E08000006	2010	0.408043699	0.524867353	0.529614653	0.273165161	0.150106123	0.154428478	0.56268235	1.686122783	0.25371749	0.340608896	0.215124285	0.249961821	0.342676697	0.745947703	0.663317217	0.215840828	0.744810053	0.014012355	0.091638102	0.748992201	0.846407834	0.740400725	1.029675737	0.287214424	0.412324775	0.321689641	0.124116758	0.669125124	0.070911585	1.881967614	0.042749069	0.209010395	0.195092163	0.793574155	0.561186555	0.193526836	1.256709388	0.386913921	0.264116553	0.09440676	0.256992316	0.102305024	0.284334657	0.612582008	0.308929935	0.187449041	0.213702797	0.449951885
E08000007	2010	0.46693583	0.558237041	0.574549156	0.297086959	0.170194915	0.174067619	0.627705496	1.503687276	0.264832611	0.370195117	0.222611044	0.267813227	0.385616375	0.739094535	0.712850302	0.227926059	0.802979598	0.015791136	0.095670602	0.805790875	0.89261035	0.808423296	1.07952692	0.309227453	0.456179822	0.346762654	0.13916825	0.746648884	0.073999322	1.981138673	0.04328476	0.229753511	0.210878388	0.842962715	0.571643463	0.210539157	1.551046807	0.433179521	0.28432584	0.081257529	0.280098816	0.102345058	0.332578279	0.647619163	0.3169272	0.213396649	0.241592323	0.478099998
E08000008	2010	0.431888994	0.544536828	0.553709905	0.284341898	0.157130495	0.165161933	0.588041624	1.696931598	0.263340145	0.356838351	0.225716633	0.266035734	0.356447825	0.764345689	0.690921104	0.22452501	0.779664813	0.01436976	0.094160027	0.790442695	0.880048035	0.785250595	1.07452526	0.305345214	0.436100805	0.338333085	0.130864974	0.717053175	0.072803706	1.968996757	0.043397211	0.220863679	0.203295426	0.839183909	0.583707318	0.202827987	1.325218468	0.4139289	0.277071223	0.095262703	0.277142787	0.105933148	0.29895269	0.642679855	0.316897566	0.198735122	0.221972955	0.46095892
E08000009	2010	0.456237734	0.552974204	0.568946382	0.28938705	0.171467852	0.169054617	0.62326762	1.468626971	0.259786058	0.362506437	0.215897037	0.260663675	0.383007096	0.742230976	0.704252428	0.225371316	0.783169932	0.015324371	0.097969353	0.789294542	0.887706252	0.777946356	1.058497577	0.298142572	0.442159495	0.337301408	0.138315294	0.718124999	0.07776724	1.905520449	0.043275192	0.226593947	0.203410516	0.837687144	0.562677318	0.208490766	1.489822759	0.407580235	0.279104645	0.085035685	0.265610465	0.101456111	0.324950903	0.614265231	0.313162813	0.210336012	0.238730135	0.476567612
E08000010	2010	0.450259248	0.561434647	0.565366575	0.297848772	0.156304338	0.170202774	0.597628735	1.692139803	0.27077032	0.368956196	0.229213479	0.275772081	0.36741882	0.764185332	0.715162848	0.229166624	0.815092545	0.015471893	0.091845392	0.813126439	0.895640307	0.814986631	1.101295634	0.314622872	0.452906367	0.355637357	0.133806719	0.759137452	0.066449588	2.04675433	0.044248391	0.224993492	0.209401845	0.841718907	0.59546508	0.201847001	1.500355456	0.448167962	0.281802301	0.087621182	0.285597343	0.105319842	0.311327226	0.668786803	0.331412306	0.201239666	0.232050983	0.476955777
E08000011	2010	0.439988053	0.557374085	0.556746295	0.298151182	0.151170903	0.167781106	0.579171759	1.74074667	0.272213343	0.36527326	0.232177998	0.273864971	0.354293617	0.771399119	0.715961081	0.232275507	0.81145683	0.015120778	0.091133832	0.808332152	0.893162957	0.802231638	1.094492155	0.314300452	0.448431016	0.351868858	0.129660404	0.736492384	0.065592572	2.062422049	0.044870968	0.220123107	0.207008419	0.829438769	0.600989518	0.199733032	1.384098112	0.437471277	0.278826913	0.093566526	0.287287779	0.108683823	0.298757296	0.653295935	0.329861616	0.19487459	0.223560611	0.467732233
E08000012	2010	0.406550524	0.530239127	0.528960145	0.272556239	0.148280522	0.154870187	0.562261021	1.718901171	0.251294509	0.338630405	0.215814279	0.249124054	0.344995415	0.749261107	0.670160809	0.21536615	0.75196376	0.01437434	0.091922225	0.749708899	0.841971153	0.742199646	1.030782773	0.286939869	0.419122387	0.323633968	0.124362903	0.674476385	0.069088578	1.902037981	0.042639055	0.208523189	0.196152339	0.788169413	0.56217947	0.191818628	1.290201347	0.395448374	0.265528668	0.086504101	0.257756997	0.10267057	0.287877035	0.630205949	0.313017628	0.187423368	0.213981411	0.450621094
E08000013	2010	0.453478264	0.562553863	0.568520795	0.303077421	0.157003435	0.174550248	0.600014286	1.73667999	0.272053625	0.373731423	0.235445435	0.279332641	0.364852356	0.769515809	0.724261968	0.231372789	0.825320735	0.016004718	0.092219551	0.821001224	0.900035293	0.832755406	1.113589626	0.323817482	0.457163494	0.356398476	0.134754883	0.766269155	0.067075095	2.092215022	0.04460194	0.227261624	0.214769825	0.843480802	0.600470361	0.205663765	1.467340882	0.455012529	0.286650371	0.090103613	0.294773921	0.109544436	0.31839595	0.691716292	0.327389242	0.203334218	0.233969901	0.474322421
E08000014	2010	0.473227358	0.56337846	0.579625548	0.306885532	0.1664158	0.181023767	0.617936266	1.631280882	0.275856583	0.37998763	0.239794034	0.285518187	0.376156266	0.748849376	0.729349169	0.235083166	0.82998948	0.015739126	0.091994066	0.836817548	0.913673967	0.851411257	1.119581555	0.331031344	0.472126972	0.361614309	0.136698176	0.786248394	0.068092578	2.11061435	0.043533739	0.232686191	0.220458854	0.855773842	0.594883173	0.211996551	1.517026679	0.468451665	0.293479036	0.079420445	0.301969077	0.1100438	0.335005119	0.689914266	0.324677779	0.213287225	0.244627438	0.479694146
E08000015	2010	0.461613654	0.564004067	0.572481989	0.304383017	0.161387158	0.177371216	0.608617211	1.653942257	0.274800045	0.374155169	0.236326098	0.282308595	0.371560696	0.755715576	0.724560714	0.235359101	0.831121966	0.016284684	0.092434702	0.82483399	0.902723206	0.833357436	1.110722847	0.325177345	0.462432943	0.358355347	0.13507581	0.769641486	0.067984128	2.090325085	0.044361992	0.228096719	0.217372108	0.83580503	0.591221286	0.207389355	1.50066665	0.455958303	0.287680188	0.084879855	0.294914315	0.109863937	0.330075076	0.682242637	0.324658294	0.206668358	0.238926079	0.47702398
E08000016	2010	0.442900463	0.555129812	0.560578613	0.296207472	0.153478045	0.169718123	0.586604926	1.707715168	0.268613161	0.365225043	0.232360585	0.275697167	0.358859511	0.756297833	0.711207457	0.229268541	0.810215764	0.015538388	0.090591701	0.806614647	0.887496419	0.813632838	1.096344242	0.317252926	0.449131984	0.351646553	0.131472858	0.749508182	0.0659096	2.055681128	0.0435055	0.222035193	0.210456919	0.831106073	0.590564303	0.200263993	1.440885321	0.446601942	0.280088755	0.086220293	0.288375755	0.108075461	0.308696028	0.670913898	0.324852926	0.198566183	0.229622403	0.465468921
E08000017	2010	0.438550992	0.542479027	0.551039162	0.291256938	0.153977071	0.167935499	0.584083548	1.665536168	0.263958223	0.357454298	0.22555394	0.269216896	0.355901355	0.747439162	0.694463928	0.223052566	0.792596645	0.015015569	0.090410857	0.792222592	0.873213942	0.794767852	1.072881482	0.309757028	0.440922545	0.342112549	0.129760769	0.733810343	0.067543809	1.992418144	0.043103812	0.220216266	0.205487919	0.825573835	0.578843087	0.200537005	1.392048302	0.430237825	0.276290313	0.089309579	0.282034612	0.105145926	0.307189922	0.660463512	0.315281601	0.198741603	0.226617337	0.459182207
E08000018	2010	0.441009403	0.543495109	0.552553449	0.290910098	0.154490376	0.168606174	0.584370184	1.648240277	0.265212736	0.361226547	0.22876475	0.268563099	0.354724698	0.748531981	0.69714139	0.224048877	0.793126675	0.015095982	0.090169171	0.799025261	0.880351613	0.804256134	1.08006928	0.31288907	0.441847393	0.343254983	0.12988215	0.737051054	0.067387536	2.004609452	0.043171148	0.221542143	0.206717127	0.827630274	0.581655434	0.201369531	1.394207199	0.434976066	0.278347041	0.088112887	0.283509069	0.10575233	0.306928317	0.657342985	0.315332246	0.198710752	0.226963418	0.460610714
E08000019	2010	0.409891599	0.513759599	0.522461641	0.262650707	0.153038317	0.154055919	0.565577477	1.553185954	0.242865743	0.331474892	0.206702986	0.242739002	0.343531789	0.718767093	0.652091677	0.207748688	0.71787916	0.013661664	0.091060281	0.731387941	0.826421316	0.721378682	0.997837301	0.278209818	0.408101704	0.310284478	0.126248	0.658440735	0.071999979	1.791807843	0.040212573	0.208716186	0.190467572	0.782672888	0.537006896	0.193619936	1.25710797	0.37535775	0.261443494	0.085991133	0.249161468	0.098801714	0.294092388	0.589978889	0.293358108	0.190623038	0.21565149	0.439143726
E08000021	2010	0.394701026	0.505238522	0.511094955	0.259411914	0.147002027	0.150704468	0.548261012	1.581985057	0.2408787	0.325838686	0.202603091	0.237836373	0.335247365	0.715407824	0.646689	0.204154171	0.708158198	0.013322546	0.088187042	0.720248281	0.813059495	0.708547494	0.983789216	0.271918898	0.400038079	0.307115029	0.123820016	0.64267219	0.069976135	1.778357637	0.039740176	0.201538975	0.186819245	0.769256103	0.53003871	0.186665162	1.236634308	0.371597104	0.255979028	0.081012507	0.241756816	0.096730309	0.278170333	0.585939025	0.296626764	0.182785642	0.208309343	0.434079029
E08000022	2010	0.461371534	0.569009384	0.579164273	0.306233243	0.160661225	0.176240156	0.61524223	1.666399499	0.276067111	0.379245799	0.237709959	0.277342856	0.37544121	0.771186371	0.730822458	0.232695022	0.832489216	0.015892041	0.093375723	0.836087824	0.919489147	0.842029854	1.12559408	0.324597412	0.465031306	0.360416531	0.135915375	0.769302708	0.068687434	2.107259772	0.045177421	0.230953907	0.217188057	0.857485709	0.604782874	0.209656508	1.507271308	0.45839331	0.291494513	0.084315867	0.293034403	0.108305671	0.32044502	0.691948376	0.335978705	0.207919755	0.237410011	0.486907752
E08000023	2010	0.44923932	0.555596364	0.568657905	0.296523898	0.158927334	0.174187048	0.600110809	1.700098204	0.272283315	0.366484267	0.237489717	0.275822586	0.364871626	0.764140034	0.710751557	0.232145902	0.814086718	0.015567549	0.092563107	0.81798723	0.899203825	0.827193419	1.108677122	0.321769896	0.454227097	0.35210083	0.133618923	0.745520325	0.071382076	2.074710639	0.04446042	0.225782833	0.214593983	0.847793033	0.594684374	0.206612741	1.392024655	0.442939348	0.285989801	0.083295363	0.29443383	0.110630075	0.314696851	0.687996546	0.323080435	0.204385358	0.231246331	0.468632836
E08000024	2010	0.446198485	0.557436567	0.566544506	0.297176109	0.153863151	0.172287864	0.594513915	1.759131161	0.270784317	0.36758828	0.237479948	0.277723198	0.360852122	0.769315865	0.714130226	0.231999437	0.817321588	0.015343099	0.092328749	0.817163663	0.898137227	0.823044721	1.108830732	0.3215869	0.454921508	0.355788484	0.132823563	0.750714731	0.068043359	2.088038971	0.044515895	0.224499934	0.212075401	0.849553749	0.600480679	0.203734668	1.403124426	0.445588462	0.284543875	0.086212086	0.29708381	0.110025908	0.309331838	0.681924406	0.32901729	0.201152993	0.228176263	0.465899314
E08000025	2010	0.379635654	0.484456288	0.510925349	0.229554003	0.166317733	0.144512744	0.579606071	1.363331107	0.226603022	0.310012189	0.188145271	0.212726388	0.34118197	0.7100189	0.596729583	0.197290507	0.619080679	0.011386912	0.103425509	0.6687293	0.803111448	0.642745406	0.923644772	0.25019539	0.370630385	0.267087375	0.124081296	0.572331312	0.088212029	1.513268033	0.037123573	0.208371272	0.17619412	0.800144926	0.493924234	0.203053656	0.9843815	0.3026597	0.255623721	0.095721196	0.220333095	0.095569731	0.285032313	0.514544958	0.254383073	0.199722611	0.207943497	0.421886343
E08000026	2010	0.409455113	0.514383955	0.532300836	0.258697516	0.161866333	0.154845783	0.587475844	1.492286016	0.242103996	0.33151357	0.203340567	0.23548227	0.351949163	0.733310416	0.644717488	0.208534496	0.69547949	0.013138572	0.097905104	0.725928575	0.837524799	0.708639992	0.991906769	0.274093933	0.401039536	0.300078906	0.130695637	0.639926861	0.081616991	1.718433442	0.040055	0.213845207	0.188706364	0.80960066	0.532532266	0.202292265	1.182982923	0.35519918	0.265801074	0.091091696	0.246372336	0.098657866	0.296044835	0.578290755	0.284149189	0.199585415	0.218201665	0.441437616
E08000027	2010	0.452898658	0.552171844	0.571426315	0.29445821	0.165014336	0.173306248	0.610681328	1.627747039	0.267155504	0.366830412	0.231937062	0.27098934	0.369771237	0.754737767	0.705950285	0.228868587	0.791896362	0.015293185	0.095365294	0.807661432	0.900010233	0.817193432	1.095089545	0.316454464	0.451584902	0.345790959	0.135102419	0.743489669	0.073180586	2.004384444	0.042978685	0.229888094	0.21140097	0.85156655	0.58630055	0.210185486	1.41718466	0.435436732	0.286293874	0.087941138	0.288686626	0.108087633	0.323246724	0.660766102	0.314121321	0.210516171	0.236883856	0.471170589
E08000028	2010	0.405297603	0.510346221	0.534146747	0.255533603	0.162140808	0.155160093	0.582251906	1.546374079	0.245563247	0.333698091	0.212054539	0.237169644	0.345746393	0.741337076	0.637873715	0.211343897	0.691102829	0.012978692	0.099834784	0.730172225	0.846422614	0.71650239	1.008356806	0.280327431	0.404082902	0.297461594	0.126146238	0.643604834	0.081011077	1.74102063	0.040018135	0.218807175	0.189931718	0.823850635	0.53968077	0.20544337	1.107986319	0.355940707	0.266440623	0.099085041	0.251042954	0.104026774	0.293114449	0.57870581	0.280994538	0.202179971	0.215779885	0.438792021
E08000029	2010	0.48254538	0.572125249	0.589518556	0.303721634	0.174831174	0.180710268	0.638240966	1.555427729	0.272199343	0.377690354	0.233419013	0.280445604	0.390313161	0.759435081	0.736261983	0.235868306	0.826886776	0.016851351	0.096788256	0.831566537	0.91742242	0.836434001	1.114254121	0.324507487	0.467608594	0.354630676	0.143411408	0.770089579	0.075131141	2.044534569	0.044342246	0.235631166	0.216607722	0.857698042	0.587252097	0.215613498	1.563788389	0.446262061	0.292542341	0.083458733	0.291270218	0.108112044	0.347082374	0.666817466	0.321853348	0.217271046	0.250787719	0.486503364
E08000030	2010	0.430059163	0.528271463	0.548730541	0.277159069	0.16263868	0.165695652	0.591825965	1.573218777	0.256777117	0.350821428	0.220433032	0.254990897	0.355861941	0.745543375	0.677248755	0.219037472	0.74648035	0.014386284	0.095076068	0.769536786	0.867870675	0.768732534	1.048064491	0.300498386	0.426273715	0.32092604	0.130540521	0.694695677	0.077153257	1.874781533	0.041611147	0.221759569	0.201589219	0.833572338	0.563600313	0.206629618	1.254612216	0.396023236	0.275138964	0.093990359	0.270972327	0.105258217	0.30417973	0.622794095	0.297358553	0.203238739	0.225689412	0.447705197
E08000031	2010	0.413037276	0.51533231	0.545917333	0.249329199	0.169727796	0.159289801	0.602521381	1.502877742	0.244227267	0.329012665	0.212705353	0.240689732	0.359001687	0.742160293	0.637078176	0.210807164	0.687702845	0.012924834	0.103682895	0.728588472	0.848564023	0.724434438	1.013439329	0.283441521	0.408027407	0.294218153	0.130836502	0.642447826	0.088315415	1.708661384	0.039330395	0.223709556	0.194439258	0.848426454	0.528240811	0.210933599	1.102586165	0.352306156	0.272704717	0.089892821	0.251822743	0.106224911	0.304151338	0.583723639	0.275263708	0.209540334	0.223810024	0.438948541
E08000032	2010	0.388012334	0.486027809	0.51059803	0.243907331	0.1599574	0.149354577	0.566862972	1.378185378	0.235346411	0.318442139	0.192950749	0.223595602	0.337644639	0.706018973	0.620754085	0.200779868	0.656132422	0.012112949	0.094972326	0.693237575	0.806658366	0.672975962	0.945010199	0.263934451	0.378285158	0.282016816	0.12309361	0.602049185	0.081648872	1.597675818	0.037943259	0.208018725	0.179828894	0.79926276	0.507382014	0.198223078	1.047048338	0.32637519	0.254954308	0.095144211	0.233065049	0.095728957	0.27769875	0.533606186	0.266280402	0.19440313	0.206711666	0.415110454
E08000033	2010	0.438299453	0.546946498	0.554126254	0.286629957	0.159365837	0.166782974	0.593506832	1.619443713	0.262318269	0.358940866	0.222510454	0.266564536	0.361938255	0.747027003	0.693589209	0.224015257	0.78746719	0.014916166	0.093825681	0.789206431	0.877210772	0.791416402	1.068611184	0.304977104	0.440083628	0.340986804	0.131572066	0.731731017	0.070190809	1.968030834	0.042783791	0.222282636	0.205818502	0.833944815	0.574705258	0.202553762	1.416223905	0.426010037	0.276839566	0.085937533	0.275608341	0.104386643	0.309136298	0.643753787	0.314794888	0.201822688	0.227625144	0.466364344
E08000034	2010	0.423173592	0.525283654	0.539784048	0.271336751	0.160063074	0.160071357	0.585688789	1.508538551	0.251299051	0.343347461	0.211017539	0.249801355	0.354921138	0.72842035	0.662900544	0.213750177	0.736240115	0.013965706	0.094295775	0.752426675	0.850625416	0.747802928	1.021630687	0.288044693	0.418047244	0.318845622	0.129536866	0.686232626	0.073761539	1.822961456	0.040808427	0.216855681	0.195680793	0.816276816	0.545534047	0.200318526	1.315568318	0.393258193	0.268805906	0.087242191	0.259248131	0.100316045	0.302779318	0.597762776	0.296376296	0.199967612	0.222476648	0.452707358
E08000035	2010	0.41695133	0.528221357	0.535339852	0.270707856	0.15705138	0.156143962	0.581314103	1.566696462	0.247112622	0.338999171	0.206322276	0.246279901	0.35745974	0.726534591	0.663836931	0.210470302	0.736855116	0.013904777	0.093087944	0.742094869	0.840246956	0.729815404	1.010381838	0.280334669	0.417507311	0.318847388	0.127658956	0.675225325	0.072411395	1.819809599	0.040898885	0.212284887	0.193929661	0.797725194	0.545292652	0.19615637	1.329180806	0.385473133	0.265665432	0.085664446	0.250516552	0.098361117	0.299897058	0.598029557	0.303346989	0.195205544	0.22151152	0.454222044
E08000036	2010	0.439538592	0.547296525	0.557718346	0.291491186	0.155132082	0.168852581	0.588549482	1.689265331	0.264986057	0.361425968	0.23001081	0.270584655	0.358152869	0.756312277	0.697752529	0.226151705	0.79801783	0.01512474	0.091590697	0.801924487	0.884524913	0.806644326	1.08616307	0.313136326	0.443104986	0.346241979	0.130848201	0.73417304	0.068527251	2.020796636	0.043425467	0.221936357	0.207948156	0.836659663	0.587025088	0.201843257	1.390593732	0.433912975	0.279630454	0.086956642	0.286346582	0.106654189	0.306836089	0.66551396	0.318878559	0.199998222	0.226689777	0.462745073
E08000037	2010	0.44618143	0.555711516	0.565089704	0.298350663	0.15626786	0.17149172	0.595025201	1.72498561	0.269959553	0.367468875	0.235307628	0.274033339	0.363158441	0.761767116	0.711350514	0.228783716	0.813601326	0.015428683	0.091431095	0.813523187	0.894916222	0.817817789	1.104074802	0.318028908	0.453444558	0.350866929	0.132187685	0.746879354	0.068528758	2.069205569	0.044506653	0.224108031	0.212612899	0.838898948	0.594372018	0.203884137	1.428469456	0.441264716	0.284326641	0.087883287	0.288436294	0.108564517	0.311996126	0.678727179	0.327790843	0.200501607	0.230556565	0.470548791
E09000001	2010	0.464935755	0.603832368	0.627274057	0.263584464	0.195752327	0.176220048	0.71748999	1.850237342	0.245590661	0.334053351	0.220944411	0.265099185	0.445874221	0.806960505	0.635877808	0.223171593	0.769270211	0.013914202	0.121846724	0.796848494	0.925565669	0.773136628	1.101703671	0.288054343	0.439785829	0.311233391	0.165642812	0.664253819	0.12541352	1.83980835	0.040929085	0.24605334	0.226517135	0.936436877	0.559494991	0.233532548	1.317704514	0.373264637	0.307456097	0.057584777	0.274408266	0.110982483	0.380284677	0.663543129	0.306775336	0.24987518	0.270715481	0.496498414
E09000002	2010	0.388643367	0.512191846	0.529945555	0.243677382	0.168788656	0.14346427	0.59159092	1.382771404	0.236142882	0.331013779	0.19708186	0.212210047	0.344984202	0.76937112	0.609832647	0.207724097	0.633519707	0.011502162	0.113820939	0.694205851	0.851136549	0.649923794	0.967775864	0.247852576	0.387998362	0.278058015	0.126869984	0.599162958	0.0861977	1.58503102	0.039351654	0.220730887	0.177676281	0.838510835	0.524924437	0.207676387	1.008963017	0.318410491	0.264902159	0.127271244	0.214670642	0.101292673	0.301202733	0.478390171	0.271289053	0.206766472	0.206303795	0.468345707
E09000003	2010	0.465840495	0.56472655	0.595787498	0.268028866	0.213141634	0.171285279	0.690455456	1.255288497	0.245735871	0.34304719	0.198161769	0.240634957	0.423229798	0.755259589	0.673983347	0.220437295	0.725011227	0.014136909	0.11342729	0.7559237	0.892631697	0.722788303	1.020902657	0.270081573	0.427409311	0.307306337	0.15338506	0.666017099	0.104060061	1.641596478	0.041666222	0.233375479	0.196415851	0.885853989	0.523415776	0.224072972	1.285785594	0.345169866	0.285591109	0.083286171	0.2340866	0.099305475	0.359864509	0.528949308	0.28656488	0.236636479	0.25499392	0.499431336
E09000004	2010	0.479162434	0.591255394	0.600411744	0.305432748	0.182708539	0.177168758	0.659268668	1.513263384	0.271108404	0.384252936	0.226746329	0.271045819	0.405808002	0.801180749	0.742783896	0.237508709	0.816904481	0.016289937	0.107237579	0.823272616	0.940596846	0.813171054	1.118273991	0.312442914	0.470149821	0.353095213	0.14421365	0.767551959	0.080887514	2.000517267	0.044391314	0.241021813	0.215904	0.891930685	0.597532736	0.222134198	1.48254397	0.43212263	0.29836022	0.101662978	0.27446439	0.108766311	0.356687163	0.604642392	0.329084796	0.223707099	0.251762597	0.515068484
E09000005	2010	0.407865547	0.522397871	0.557790644	0.210791782	0.204023988	0.149292413	0.676494837	1.26060158	0.216167144	0.292670761	0.18439979	0.208488564	0.396556673	0.772836006	0.569904587	0.199345723	0.590915155	0.010257769	0.129905803	0.653781611	0.846576484	0.635327219	0.946516484	0.231850021	0.380461107	0.249418129	0.137744848	0.559697747	0.110313887	1.331136787	0.035809967	0.231330083	0.178276028	0.893890188	0.464723968	0.221279116	0.880079659	0.258965109	0.281469751	0.102331665	0.1953496	0.103582404	0.358033284	0.443316898	0.242059092	0.239263589	0.232163914	0.470649662
E09000006	2010	0.504319843	0.607391265	0.625900442	0.316296463	0.194334492	0.18524576	0.690806071	1.488385867	0.278374339	0.39650365	0.229519382	0.28069681	0.428523598	0.794911355	0.756945971	0.24340806	0.854351479	0.017569593	0.107793056	0.856789573	0.957631298	0.841261924	1.14048136	0.320284813	0.491588142	0.36326582	0.154341427	0.791886768	0.082533834	2.052093041	0.045546273	0.246737081	0.222043304	0.902893142	0.601017917	0.227096209	1.653878099	0.448841201	0.304801691	0.089728775	0.280431322	0.107723849	0.379835452	0.634441196	0.337763126	0.233590809	0.267892239	0.531335593
E09000007	2010	0.45308613	0.588028493	0.601415303	0.268270231	0.209376585	0.162295035	0.681253519	1.531704248	0.243723083	0.340734926	0.194104885	0.250234635	0.441093589	0.77050272	0.686163746	0.220022506	0.774452712	0.017177152	0.111961644	0.761917847	0.883515948	0.703521282	1.032113335	0.264033725	0.43912742	0.312458198	0.147531612	0.665658994	0.100145186	1.754181564	0.041459886	0.221925017	0.203106706	0.837720593	0.54123355	0.210602997	1.538745339	0.353709389	0.278565754	0.076141829	0.219403739	0.097620589	0.354228854	0.584155741	0.32042724	0.224700336	0.26280788	0.522663757
E09000008	2010	0.440415792	0.565748149	0.582685232	0.266572513	0.197970023	0.1618536	0.665297777	1.425338655	0.240795758	0.348500619	0.201007264	0.235568131	0.401369896	0.790125558	0.651533502	0.220273206	0.71028417	0.013824944	0.117365989	0.744181285	0.899299579	0.709449639	1.018252225	0.264835855	0.429774733	0.306803263	0.145234404	0.664998534	0.095324175	1.68338669	0.040711176	0.230793249	0.197943608	0.896874068	0.545136095	0.222391624	1.26525766	0.350223266	0.290026968	0.105113374	0.234206734	0.103463607	0.363932437	0.516373423	0.288391357	0.227854928	0.240174807	0.509898224
E09000009	2010	0.440192206	0.549330244	0.587063794	0.229137863	0.228725599	0.163098224	0.715031729	1.142050232	0.218541784	0.313130959	0.179585241	0.217824213	0.427020178	0.764769323	0.620417521	0.210387461	0.634965609	0.011996245	0.122457258	0.695019321	0.874668803	0.650732527	0.961549659	0.244614323	0.38330662	0.265911373	0.156613012	0.568552919	0.129918108	1.390263497	0.040508809	0.228598982	0.191074704	0.906427726	0.487231064	0.232670341	0.980787467	0.262808277	0.285024338	0.085662137	0.212147037	0.095382631	0.342464224	0.488103582	0.250936456	0.245270854	0.253738298	0.470023654
E09000010	2010	0.422329841	0.544902062	0.559129708	0.252314793	0.187173046	0.155486354	0.632304851	1.398092794	0.241261454	0.334782334	0.203136246	0.233361536	0.379536084	0.767941476	0.632746431	0.213458566	0.686691968	0.0129281	0.115620705	0.729673879	0.873754719	0.703706257	1.008878104	0.265336066	0.419316086	0.29440752	0.134449495	0.656186456	0.092018415	1.653952986	0.039443146	0.228758606	0.190432596	0.869261658	0.527415771	0.213343978	1.158890717	0.34541012	0.276814145	0.102555025	0.229370537	0.105172423	0.339675513	0.514022106	0.281934363	0.222105046	0.231123883	0.488294666
E09000011	2010	0.418442199	0.552148598	0.55956175	0.260436161	0.180104682	0.151163825	0.630177129	1.451446255	0.238178204	0.336577147	0.19567978	0.225840252	0.382464326	0.775571352	0.639529729	0.215564309	0.695048842	0.013480376	0.111068696	0.723210973	0.869687203	0.68038223	0.99827434	0.256237828	0.41228406	0.298508201	0.138693627	0.641646525	0.091635534	1.667400832	0.040538068	0.221018031	0.189519189	0.842591167	0.539296506	0.208352006	1.22935324	0.336770711	0.271332384	0.111271246	0.219835464	0.09946984	0.332163936	0.509404317	0.292658564	0.210760474	0.226695823	0.495967437
E09000012	2010	0.370244537	0.53215982	0.523485277	0.224304766	0.170845949	0.132556246	0.611442081	1.488867956	0.212423647	0.29572182	0.174923364	0.202836919	0.369103899	0.756692135	0.561655746	0.198774942	0.617429501	0.011348961	0.114854102	0.641845494	0.80545994	0.590740269	0.916808772	0.215783079	0.380950369	0.257639259	0.128622427	0.571266772	0.096032656	1.451533226	0.035711416	0.203379857	0.169788229	0.795715061	0.490156974	0.189296489	1.07091066	0.283237614	0.25796097	0.101595929	0.178559969	0.094037125	0.322542949	0.447342293	0.27142952	0.20140887	0.212184396	0.484232646
E09000013	2010	0.441388085	0.593587949	0.604471296	0.259064171	0.210908608	0.155478303	0.686991907	1.547567124	0.234013654	0.332916535	0.187430847	0.241396737	0.444664111	0.780272694	0.6641592	0.217689965	0.752638817	0.01685683	0.11380263	0.738518862	0.880821749	0.672571782	1.010377567	0.252581282	0.433004307	0.299997658	0.150797642	0.641478216	0.102898244	1.668160843	0.040828356	0.218127804	0.198099677	0.83553962	0.535020551	0.207260812	1.443874433	0.333260592	0.275079453	0.080995123	0.205251567	0.096829329	0.353700636	0.545994788	0.317023886	0.222133531	0.262276741	0.532608384
E09000014	2010	0.39780605	0.55278668	0.555143246	0.231391177	0.189514401	0.147480469	0.638749618	1.455319804	0.222047498	0.311073557	0.185929003	0.219579378	0.388914006	0.765692719	0.595492049	0.207263917	0.646782389	0.012386281	0.121379644	0.68494759	0.843235061	0.636599348	0.964270939	0.238719648	0.39618473	0.273671218	0.141649627	0.596157089	0.107519721	1.510383656	0.03831305	0.217226053	0.183527418	0.844672194	0.50732437	0.206715717	1.076573382	0.301342405	0.270334201	0.087827447	0.204381179	0.099404027	0.329679144	0.488514065	0.272185082	0.220424186	0.232353291	0.48153845
E09000015	2010	0.470643259	0.544063378	0.602838669	0.247720469	0.242975839	0.171687174	0.742507522	1.130078793	0.227245093	0.336291089	0.192050027	0.227002408	0.429820557	0.766574318	0.658020848	0.21797224	0.6666775	0.013120079	0.118707615	0.727161852	0.898778463	0.702773108	0.999470901	0.263629467	0.40136618	0.281983339	0.160758296	0.612978586	0.120867164	1.492020224	0.042574999	0.237747422	0.192720502	0.937260636	0.50223959	0.244305808	1.086351741	0.290682053	0.298983527	0.089859194	0.227358241	0.099487195	0.369144374	0.529327716	0.254452054	0.251478745	0.266008927	0.483693057
E09000016	2010	0.491710187	0.595661367	0.612648378	0.309049312	0.186249614	0.183049608	0.671319582	1.517302216	0.275224909	0.386087974	0.233094689	0.281432355	0.412125409	0.792913013	0.749292761	0.240615371	0.833988797	0.016941231	0.106310087	0.841156222	0.945522543	0.839003177	1.137366196	0.323507785	0.481530678	0.358977183	0.146459773	0.78469184	0.082148464	2.039697267	0.044074762	0.245561011	0.222272415	0.898285232	0.597824577	0.226432264	1.516915833	0.447263843	0.302929546	0.089901015	0.286982756	0.111407244	0.365679759	0.635945506	0.328875761	0.230533857	0.259984183	0.511370784
E09000017	2010	0.45099244	0.554736036	0.58090531	0.265147963	0.201762449	0.166222078	0.674133084	1.276093203	0.242130793	0.346453035	0.197527801	0.238486799	0.405935675	0.766107437	0.683108109	0.221358598	0.711594504	0.014048419	0.111560631	0.747988127	0.888478685	0.71960035	1.017878933	0.273391779	0.418215822	0.307458973	0.14723382	0.65260169	0.101660773	1.668353881	0.04172217	0.230707315	0.197176064	0.883749945	0.536938027	0.226171176	1.213949915	0.339796564	0.28505128	0.092307881	0.242255315	0.098050117	0.335838881	0.543925879	0.285353661	0.229423542	0.243917862	0.4787554
E09000018	2010	0.449632621	0.556415234	0.59034291	0.246410441	0.218579171	0.164963726	0.707760236	1.228372912	0.230610292	0.327233838	0.184522339	0.224070583	0.425967973	0.768905947	0.647797998	0.21479509	0.676561807	0.012839692	0.120749889	0.720003373	0.883990829	0.675411471	0.986446829	0.256657039	0.393658077	0.285617965	0.156853692	0.59993875	0.117280205	1.49721771	0.040426583	0.230479047	0.190766465	0.904147362	0.507193303	0.231635869	1.073719345	0.295024777	0.287444767	0.084306815	0.227277996	0.094480392	0.337231797	0.507408759	0.27113163	0.240663724	0.249344769	0.480056542
E09000019	2010	0.427774421	0.587647595	0.590619834	0.253057048	0.20094961	0.15102892	0.681648266	1.539501707	0.225543614	0.323738291	0.184741577	0.230790597	0.430835794	0.775203943	0.646032144	0.216028356	0.730651196	0.016692919	0.111594348	0.718844453	0.859978904	0.657800699	0.994090856	0.244082215	0.425465791	0.28933422	0.149313877	0.629077878	0.103234834	1.637992678	0.039491819	0.21535165	0.194595615	0.818133783	0.528617577	0.203266487	1.422630536	0.325111865	0.271837214	0.082506995	0.201033942	0.095948982	0.343434771	0.538269254	0.31098083	0.215832817	0.251977011	0.520714939
E09000020	2010	0.477287815	0.606808517	0.635433644	0.269145035	0.24908127	0.173543542	0.72407018	1.59737847	0.233153669	0.343772924	0.195160665	0.265170815	0.474133049	0.762564766	0.691706713	0.224267503	0.783251659	0.021229423	0.121858018	0.783215209	0.885886555	0.717582126	1.040046746	0.273762167	0.45317024	0.312626215	0.163071067	0.675585093	0.109774114	1.764928966	0.039476157	0.226946113	0.209972374	0.872727891	0.524223103	0.217287436	1.696077111	0.357250882	0.280526197	0.067511863	0.223736531	0.101581348	0.39538817	0.615553397	0.319108563	0.246374658	0.290045083	0.53142181
E09000021	2010	0.474330571	0.589538589	0.602178939	0.28680231	0.19798124	0.170778221	0.682392791	1.384682759	0.257250594	0.366258195	0.207846745	0.257468064	0.419483714	0.786117178	0.73110716	0.23073028	0.785622499	0.016169251	0.108620086	0.79364172	0.921323523	0.76313384	1.073957089	0.288578458	0.444349206	0.331992614	0.152493871	0.697748667	0.096524088	1.834890798	0.044686373	0.234380934	0.207645415	0.877758235	0.567266902	0.222725301	1.451058048	0.378110314	0.290707971	0.090414966	0.251617329	0.102108999	0.345186699	0.588123815	0.319614294	0.225580105	0.255527877	0.506941967
E09000022	2010	0.397137978	0.570982282	0.559527812	0.243764568	0.184636838	0.140871694	0.643648914	1.551918845	0.22207537	0.310239674	0.181220051	0.209727069	0.399497416	0.777238004	0.598050776	0.207312942	0.682633918	0.01381294	0.114213796	0.686492646	0.840581789	0.631079092	0.962978522	0.226811679	0.413818369	0.275886443	0.140204696	0.606020785	0.097961131	1.546453101	0.037830126	0.212477158	0.18120302	0.817582515	0.515447586	0.196401492	1.291111247	0.309246626	0.268353585	0.09017102	0.186328461	0.096072868	0.340586696	0.48750442	0.293089913	0.21088665	0.231377547	0.519264192
E09000023	2010	0.385405589	0.545136516	0.550414324	0.23100274	0.185971028	0.140593724	0.629775225	1.500664272	0.216845535	0.312138622	0.189866172	0.207824066	0.372464357	0.780385651	0.570137783	0.204765785	0.617336811	0.011649261	0.123302557	0.674735543	0.845192776	0.623681171	0.949383094	0.231165182	0.396796167	0.262761825	0.136209614	0.589783078	0.100998848	1.498067759	0.036602362	0.21774958	0.180994507	0.848770674	0.506747492	0.206934987	1.063926747	0.295799525	0.27360962	0.108538594	0.195694032	0.10330971	0.351551763	0.46371922	0.26232017	0.217834579	0.221211808	0.496851905
E09000024	2010	0.464284921	0.579321173	0.603302843	0.267915682	0.21578602	0.168519043	0.702962893	1.326792721	0.240687592	0.34959453	0.197539681	0.238298625	0.429064955	0.776993763	0.673429188	0.222621732	0.729142936	0.015292125	0.115802214	0.755457452	0.900754504	0.707747249	1.027340075	0.265068959	0.433020533	0.306835449	0.155445844	0.652007477	0.107683241	1.666674835	0.043492752	0.233145565	0.19809751	0.887331144	0.534569594	0.223694423	1.366733044	0.340212068	0.287220149	0.092526639	0.227221668	0.10039468	0.362643209	0.537524463	0.296363838	0.237319141	0.262786387	0.511385173
E09000025	2010	0.353131973	0.464094446	0.506745382	0.171850646	0.191205827	0.136800555	0.636996867	1.057497805	0.19735457	0.265250104	0.154891569	0.18324302	0.360289227	0.754054398	0.533735307	0.187800545	0.477607038	0.009272431	0.122628412	0.579326966	0.783670592	0.520710727	0.834134356	0.203597083	0.305578218	0.205380064	0.138208299	0.445627605	0.118386922	1.061226398	0.033570092	0.211856037	0.159347073	0.849547901	0.428168575	0.214660262	0.587301192	0.190597635	0.255958095	0.104943221	0.172327499	0.09052612	0.287354799	0.387329021	0.203604707	0.222999482	0.208817197	0.408817305
E09000026	2010	0.437494261	0.522788181	0.568031183	0.23121745	0.225066576	0.161916676	0.692575027	1.122791683	0.220532823	0.317528446	0.181436013	0.211467928	0.405104075	0.748598933	0.627512934	0.209311392	0.623127886	0.012258009	0.117625047	0.691951911	0.858821913	0.6568477	0.953871689	0.248248972	0.380179205	0.266923726	0.149329864	0.58151512	0.115697512	1.406668837	0.039485432	0.227445698	0.183021854	0.898098127	0.48187931	0.231228151	0.967221427	0.272815261	0.280895823	0.092961928	0.214364414	0.095823184	0.343548188	0.481638502	0.2458811	0.239906689	0.242263513	0.465650587
E09000027	2010	0.517563575	0.619723096	0.647226695	0.306923557	0.229537765	0.185691388	0.739811029	1.354156438	0.265177257	0.388620816	0.211508765	0.278986988	0.469218195	0.776363178	0.769555228	0.242044362	0.854471973	0.018991831	0.112487517	0.83849788	0.950516268	0.805453669	1.113019556	0.299680714	0.478872993	0.35080466	0.162848219	0.755711599	0.097861492	1.94050874	0.045234326	0.246589954	0.217785926	0.897500397	0.570961197	0.232568278	1.855953747	0.408811857	0.29771685	0.082971638	0.256887786	0.102503788	0.397632305	0.623646937	0.339441443	0.243838087	0.282054434	0.550435561
E09000028	2010	0.399087321	0.552499282	0.559151776	0.237617135	0.194024875	0.146439877	0.650122244	1.529817671	0.21642559	0.312757149	0.182664431	0.210844058	0.395421695	0.764507175	0.594230904	0.207114764	0.658742518	0.014128813	0.116935563	0.684171019	0.834920938	0.624846148	0.953615511	0.227374321	0.40884085	0.270114272	0.143996928	0.592180427	0.10014173	1.528005255	0.038105244	0.21313287	0.17815028	0.83580355	0.500156503	0.198293457	1.270759275	0.299657968	0.266382884	0.099694678	0.185818645	0.09946173	0.355746881	0.480562138	0.284895217	0.218564231	0.237248475	0.502584993
E09000029	2010	0.479595474	0.595853326	0.612604644	0.2961877	0.194729935	0.176505595	0.686093127	1.418407663	0.265105409	0.379074509	0.21662819	0.26196023	0.421342294	0.79680188	0.732155148	0.234708556	0.797474674	0.015965829	0.111463344	0.8170973	0.93830764	0.792437259	1.098678601	0.298990805	0.463942371	0.34331952	0.152852882	0.735751583	0.091789368	1.907868618	0.044519038	0.242237752	0.212403538	0.909616437	0.582385609	0.227160632	1.477127163	0.407816732	0.298096102	0.08857609	0.265017257	0.103575845	0.354938586	0.598862042	0.322947642	0.233432418	0.255158441	0.516190614
E09000030	2010	0.398928216	0.51487026	0.531318093	0.196435193	0.216053625	0.138721138	0.67594889	1.145373325	0.200675518	0.277444918	0.152495154	0.206903024	0.404292111	0.750944042	0.569673378	0.195450117	0.56311845	0.010842121	0.11342607	0.614564014	0.812201349	0.530646686	0.855865637	0.204077598	0.321904354	0.234753901	0.146415491	0.467321379	0.13126643	1.192785048	0.039660068	0.198456814	0.174250463	0.780122756	0.454044447	0.207217186	0.865588074	0.20780571	0.24986365	0.090350843	0.169546749	0.085374405	0.277057592	0.431298656	0.240403994	0.209153765	0.24158541	0.44612263
E09000031	2010	0.402645971	0.537813936	0.553182365	0.23854542	0.187134484	0.148561412	0.634031864	1.378384955	0.226424712	0.316778926	0.188726347	0.217645568	0.375876611	0.769134343	0.60267314	0.206734435	0.639933595	0.012113876	0.119908956	0.692812471	0.856752947	0.646757433	0.966374984	0.243087275	0.394017847	0.272933175	0.138158699	0.600570169	0.099546828	1.525025047	0.03822105	0.221953516	0.182932775	0.859359522	0.508109534	0.2119032	1.059667153	0.303815352	0.271720715	0.106823433	0.209073302	0.100423843	0.331777666	0.480518097	0.266685368	0.220324348	0.225500914	0.479266902
E09000032	2010	0.469265981	0.610624103	0.621584786	0.267720831	0.227529941	0.157916309	0.726944422	1.551643255	0.235146582	0.340463136	0.18368662	0.237927798	0.469025399	0.78266159	0.682305265	0.221029425	0.781911772	0.018001936	0.114730922	0.746036935	0.902222357	0.675459353	1.019218736	0.248687868	0.431094734	0.306589178	0.150478428	0.649187135	0.111947397	1.663150882	0.041960075	0.225156475	0.199347221	0.835335352	0.545639508	0.215625359	1.557290635	0.325856993	0.27898223	0.082778113	0.201932949	0.093132357	0.362178706	0.551620191	0.328902021	0.23038223	0.272282107	0.554948784
E09000033	2010	0.47789614	0.606457113	0.63376528	0.258592657	0.255087282	0.170413566	0.73225403	1.348174951	0.23084082	0.334534671	0.193104876	0.267708722	0.474646438	0.792060448	0.689208844	0.223047654	0.756844042	0.019457463	0.121563327	0.783087284	0.891701355	0.692757614	1.031123016	0.265660307	0.443245464	0.293895518	0.160992294	0.637935368	0.121106615	1.700657284	0.043154104	0.224986619	0.210191043	0.875046694	0.523160243	0.219310798	1.565568381	0.323108095	0.278247425	0.078606572	0.211775638	0.104631067	0.376905879	0.619364427	0.309578041	0.244366078	0.30122709	0.529046238
S12000005	2010	0.478906784	0.572465794	0.590099232	0.307193942	0.171305964	0.185898758	0.640040396	1.64264667	0.277647592	0.382450332	0.236586117	0.28928625	0.390078222	0.756958213	0.737651247	0.233385108	0.839509131	0.017758884	0.093337987	0.844938502	0.91350146	0.87296628	1.131404041	0.334873356	0.481277552	0.360562214	0.147405694	0.806784975	0.07011656	2.12374494	0.042566489	0.237967285	0.224131081	0.879400567	0.597618728	0.217829567	1.635491313	0.484043036	0.300616878	0.075673289	0.305173288	0.108209945	0.351275266	0.756813455	0.320954045	0.220496063	0.247725921	0.483902072
S12000006	2010	0.44897553	0.550063141	0.552174822	0.299566482	0.156348659	0.169710145	0.582129365	1.778264531	0.272465987	0.362507132	0.229808665	0.270842745	0.356934659	0.750091915	0.714386574	0.22096305	0.817636953	0.014853165	0.089556353	0.806112288	0.881674933	0.795092407	1.088671842	0.309241915	0.456796764	0.34948049	0.126968665	0.755926565	0.064111559	2.042750871	0.044587639	0.219335678	0.210688033	0.816334068	0.584332621	0.198401629	1.447927935	0.441472429	0.276579537	0.081089105	0.285886138	0.107927827	0.306217364	0.665995389	0.327851702	0.197086632	0.237031464	0.471569213
S12000008	2010	0.488040238	0.584472954	0.597903085	0.312687704	0.16864134	0.185579797	0.635664938	1.699793879	0.283249259	0.391585899	0.246910291	0.294525139	0.388285044	0.781185734	0.756072581	0.243400663	0.862566113	0.016833175	0.094579548	0.863695619	0.946189779	0.87767036	1.160353069	0.341302428	0.481948381	0.376684283	0.142083147	0.804371512	0.069986316	2.163018777	0.045572783	0.239233862	0.225471864	0.876478305	0.616488704	0.216533162	1.600870648	0.48050429	0.301208077	0.083344691	0.30898831	0.11302644	0.343456492	0.710552271	0.335551316	0.216580403	0.249419741	0.498598198
S12000010	2010	0.487399338	0.588285842	0.592808468	0.314106811	0.167395837	0.182942555	0.63366888	1.697407993	0.282804231	0.394009026	0.239373862	0.293554848	0.388001337	0.78393764	0.766833153	0.241528146	0.85766074	0.016741591	0.097023357	0.85441378	0.943829797	0.859320238	1.147205789	0.33178637	0.480605327	0.377203179	0.140632383	0.799692031	0.069864317	2.142414838	0.045883185	0.239684725	0.222208776	0.876698731	0.618331526	0.215464921	1.606389421	0.470544818	0.296947709	0.092104815	0.302700094	0.111280294	0.337562629	0.674880551	0.338697792	0.214821582	0.245996296	0.501883233
S12000011	2010	0.436660853	0.54665917	0.553685015	0.282881592	0.16192752	0.160259842	0.603564934	1.542282845	0.251300618	0.343386045	0.205928103	0.250733068	0.378623547	0.720205408	0.683712026	0.214160725	0.791758789	0.015799528	0.09274285	0.751625729	0.845216507	0.741210937	1.028801888	0.283178828	0.43580079	0.327752897	0.133315796	0.698628244	0.070962797	1.87387794	0.042817199	0.213866262	0.202182065	0.780022936	0.546678501	0.194247748	1.545086637	0.398139845	0.266202856	0.077163213	0.251080466	0.098637461	0.315164906	0.620370649	0.320249465	0.196139408	0.235479955	0.469699838
S12000013	2010	0.497673324	0.570723291	0.590120601	0.306739649	0.173972381	0.187107951	0.632128266	1.743571064	0.281193523	0.381684897	0.247407106	0.295515155	0.386566359	0.741257377	0.732758525	0.239710649	0.853287862	0.016123662	0.093293345	0.850130412	0.91528433	0.876315111	1.147412293	0.34199512	0.485567204	0.379602283	0.146533633	0.805273304	0.068813547	2.175555755	0.046006727	0.237154041	0.226054063	0.860282443	0.600261656	0.215123604	1.618503203	0.48069745	0.299680389	0.073724341	0.312560652	0.112665599	0.34773552	0.726959564	0.321116052	0.215140206	0.251843938	0.481788954
S12000014	2010	0.463298535	0.580934462	0.585693914	0.307222491	0.162286785	0.175838293	0.623802603	1.731932979	0.275313981	0.380708577	0.235660765	0.282913059	0.382601519	0.783001036	0.738707744	0.234577769	0.843142699	0.016134649	0.096035774	0.836143597	0.926282696	0.841975302	1.1333608	0.324036127	0.469069275	0.365662577	0.13832202	0.780200512	0.069475162	2.113591534	0.045305577	0.234349653	0.217869963	0.870714105	0.613011136	0.209702486	1.577261887	0.459988494	0.291395818	0.090302654	0.293702819	0.10864975	0.323324357	0.694970202	0.340201375	0.209173997	0.239986197	0.490864154
S12000015	2010	0.46733676	0.580156482	0.587720053	0.308188462	0.164058194	0.178354874	0.624516286	1.749483236	0.276533019	0.38150165	0.24022774	0.284901811	0.381061334	0.777569138	0.738050884	0.235996601	0.844942762	0.016347245	0.095096599	0.840480563	0.923988611	0.851012903	1.135793127	0.329103903	0.472636702	0.366397128	0.137905188	0.782602799	0.069384548	2.131137381	0.045038981	0.233514234	0.220760485	0.868380464	0.610838346	0.211773286	1.565060282	0.465021678	0.294041813	0.087691837	0.300311442	0.110156587	0.330211695	0.708304254	0.337296608	0.21142991	0.242215956	0.487271837
S12000017	2010	0.483701998	0.580138775	0.594492317	0.309449346	0.170852957	0.184188226	0.639436828	1.676607635	0.280374299	0.385647562	0.23895147	0.294983448	0.39065631	0.765768428	0.739984765	0.236698649	0.85578318	0.015939629	0.094694426	0.855576868	0.928224556	0.867278154	1.141780288	0.334120604	0.483829484	0.37228836	0.143020229	0.816717764	0.069215364	2.137728287	0.044231649	0.238572203	0.223482631	0.886839281	0.605312114	0.214891253	1.650834664	0.482998116	0.298675856	0.07888864	0.305368875	0.109465789	0.343523038	0.718795009	0.334141153	0.217939312	0.250524949	0.496337148
S12000018	2010	0.468766829	0.585197703	0.589403643	0.314407567	0.160969839	0.182602381	0.621692863	1.827056171	0.284367245	0.386932047	0.248876501	0.291957954	0.378303125	0.800201317	0.748838321	0.239662476	0.863984448	0.016030427	0.095318577	0.862752319	0.938332731	0.866983808	1.160676172	0.33730937	0.480985363	0.372401859	0.138872684	0.798573356	0.068826911	2.203122915	0.046213964	0.232609463	0.224269336	0.882920536	0.624147812	0.211671344	1.531404538	0.474315213	0.298679956	0.085030084	0.307958321	0.11353773	0.325844292	0.736094584	0.343816648	0.208454866	0.240098889	0.493414844
S12000019	2010	0.472965193	0.58434353	0.589422095	0.308233712	0.16588088	0.179114587	0.630479965	1.70500643	0.275903527	0.381790241	0.235761776	0.28962899	0.387132582	0.776326291	0.742959794	0.235322222	0.846886178	0.016239865	0.096285314	0.842370386	0.92303314	0.847401652	1.131786335	0.327476768	0.474409719	0.367216892	0.139869727	0.795738524	0.069263555	2.11750191	0.044335418	0.237273028	0.219671906	0.876114298	0.611646675	0.211126198	1.617746364	0.469655891	0.293285962	0.089968118	0.295538089	0.10877199	0.332122352	0.685367158	0.340378617	0.213040959	0.243474921	0.492076513
S12000020	2010	0.47117185	0.569621041	0.585680413	0.311536067	0.164445387	0.184696383	0.622891579	1.694096928	0.283404125	0.387499138	0.239452367	0.291693682	0.381420645	0.767068441	0.734882542	0.232724739	0.849444931	0.016557965	0.092559205	0.845531797	0.92277407	0.854769914	1.134970551	0.332831811	0.473959638	0.364089073	0.140337351	0.802008009	0.069101031	2.116835496	0.045528792	0.232719197	0.221176491	0.876798143	0.595299599	0.211691456	1.619939189	0.476759648	0.293855846	0.08344268	0.303881533	0.109793326	0.337989937	0.724653074	0.332024511	0.214962057	0.247639862	0.495042552
S12000021	2010	0.471144526	0.585234334	0.592249577	0.313601769	0.164677162	0.183434866	0.624434341	1.809393375	0.28247538	0.38484817	0.247699372	0.294803787	0.378009492	0.790086345	0.743439943	0.241894576	0.86308751	0.017051316	0.095317788	0.852305198	0.933976225	0.872822535	1.157318359	0.339854849	0.477220945	0.37139114	0.138787877	0.803309181	0.06913737	2.192462616	0.046288643	0.235509445	0.226285703	0.877547081	0.621299634	0.21266599	1.548447105	0.479614731	0.297931862	0.089891382	0.310439066	0.115391355	0.334991126	0.731146294	0.33730799	0.21180547	0.242717521	0.489374888
S12000023	2010	0.481352386	0.575657855	0.59345531	0.316402225	0.169017815	0.187446548	0.635445681	1.645058143	0.287531108	0.393867997	0.241637571	0.298631001	0.389258187	0.763125335	0.750354081	0.236080863	0.866890062	0.016432477	0.092278544	0.859795199	0.936351744	0.871574707	1.149894756	0.337816556	0.488855571	0.37359346	0.144827882	0.823919371	0.069192973	2.161139819	0.043951164	0.233891748	0.227535923	0.877931744	0.600395181	0.214043583	1.715958522	0.488522606	0.302255318	0.075792867	0.30715351	0.112574953	0.342137135	0.736050127	0.334909229	0.217339734	0.256321929	0.495914916
S12000024	2010	0.489381503	0.58211208	0.601442188	0.313180304	0.172560477	0.18828277	0.644867248	1.676128261	0.282435065	0.389185777	0.244834866	0.29774028	0.3925029	0.767494693	0.746155942	0.240841439	0.862426061	0.016692072	0.095120604	0.860351718	0.937391989	0.880836418	1.15480032	0.341505216	0.485235044	0.373690799	0.142871714	0.817940346	0.071380641	2.163017	0.044724156	0.241116276	0.228893871	0.886889673	0.606733391	0.218596353	1.623660026	0.484208248	0.302388126	0.078262214	0.312369869	0.113257072	0.351815276	0.723171475	0.332049618	0.221195716	0.254265251	0.495768994
S12000026	2010	0.491407726	0.583955172	0.602735083	0.311891264	0.173727605	0.190214204	0.642977079	1.689847164	0.284631374	0.39035056	0.251550998	0.304591852	0.390645444	0.763422585	0.745372932	0.241551124	0.868429723	0.016424191	0.095030115	0.869663894	0.939028535	0.889970234	1.164972623	0.347445425	0.491455213	0.37536353	0.14264042	0.833540772	0.071382689	2.191126192	0.044058063	0.241124735	0.231860685	0.892909367	0.608056969	0.218292731	1.638365067	0.490485907	0.304852271	0.077597802	0.313899262	0.115801365	0.354613884	0.727798125	0.329615669	0.21965601	0.256830913	0.495433752
S12000027	2010	0.474816646	0.566541501	0.574224592	0.298715831	0.168176299	0.173803838	0.62808847	1.577218971	0.26741761	0.370492687	0.218030703	0.2763417	0.388221815	0.750861819	0.727603303	0.226966062	0.821487422	0.016337452	0.096029329	0.81463487	0.884075195	0.80959857	1.089224747	0.309228801	0.463965687	0.356427043	0.140372557	0.781876674	0.066960108	2.009645167	0.04201377	0.231814428	0.209632371	0.855141976	0.581269426	0.20770209	1.69438818	0.456269002	0.284230167	0.077554003	0.280494383	0.09976732	0.332104214	0.687747272	0.329914081	0.214295113	0.242420295	0.48313136
S12000028	2010	0.493772486	0.596818879	0.60860263	0.320875114	0.172970018	0.19187526	0.653207827	1.718091582	0.285479417	0.392703303	0.250429692	0.30288066	0.398181916	0.781862629	0.76213159	0.245076364	0.880766202	0.018313733	0.096240606	0.867159318	0.944439573	0.891969457	1.172943413	0.348576156	0.4956462	0.376098746	0.144664701	0.827737814	0.071608116	2.205156542	0.045236872	0.24275277	0.236053063	0.881269505	0.616096266	0.220846465	1.654843352	0.491993298	0.305777436	0.0830429	0.316972796	0.117068328	0.361937952	0.739922287	0.335916821	0.222479022	0.257788938	0.500504235
S12000029	2010	0.470010978	0.588671799	0.594353644	0.307956688	0.167143321	0.179791008	0.635819893	1.725636774	0.277232553	0.384656675	0.236034589	0.288422087	0.389894692	0.784602348	0.746785237	0.237332906	0.851410919	0.016619892	0.097139563	0.840332883	0.930368193	0.849542916	1.137462528	0.327775651	0.475348391	0.367255393	0.141128009	0.791706993	0.071155602	2.123150573	0.045422705	0.236759205	0.221960011	0.882440571	0.612110304	0.212828793	1.60555096	0.468237563	0.295199122	0.085818168	0.298928084	0.109979555	0.332654158	0.706065901	0.340236655	0.214697672	0.244603583	0.495338407
S12000030	2010	0.472744307	0.573420754	0.587619396	0.29991219	0.169518408	0.179182269	0.629206209	1.632868354	0.27515425	0.375979424	0.235943083	0.284581638	0.3876546	0.763219116	0.729943845	0.234921008	0.836716881	0.016318373	0.096318441	0.830455461	0.916707331	0.834941569	1.121304167	0.324738458	0.46965542	0.360574877	0.140108161	0.780306309	0.072418613	2.061417139	0.044458501	0.232927698	0.21885056	0.862382321	0.59017208	0.210667549	1.588621078	0.453726101	0.290603221	0.080566421	0.290445413	0.109575721	0.338233064	0.674943589	0.330592156	0.212806874	0.246939752	0.491648018
S12000033	2010	0.441348405	0.571051597	0.573215487	0.294838007	0.160309296	0.164359678	0.6223033	1.720882933	0.258495618	0.362604094	0.21811874	0.258982565	0.38549688	0.769586307	0.714160903	0.22035868	0.806861646	0.016130767	0.096623039	0.791561088	0.885582553	0.787106352	1.082799658	0.298276608	0.449610266	0.34435989	0.135945151	0.722447212	0.072334563	1.981771273	0.044596011	0.223591962	0.210179194	0.828312893	0.581024207	0.205938389	1.569022306	0.422333505	0.283451294	0.082331722	0.267878558	0.101483781	0.318043668	0.674087662	0.33798998	0.20456915	0.236077192	0.486937536
S12000034	2010	0.485709331	0.587598598	0.595869524	0.312262317	0.170870233	0.180044895	0.64486563	1.595545983	0.27878633	0.387180766	0.22896195	0.289531404	0.400894936	0.771643255	0.750739561	0.235211159	0.853657917	0.016898468	0.096810178	0.845821287	0.927980689	0.844812935	1.126701315	0.323331614	0.480140328	0.369295181	0.144339914	0.804816389	0.069752528	2.078039703	0.044477085	0.237368826	0.217701026	0.87560854	0.597032537	0.212851759	1.755205289	0.472422689	0.292514078	0.084752178	0.289528146	0.10465449	0.342966868	0.679367038	0.340460509	0.217035673	0.253677933	0.505262953
S12000035	2010	0.502260854	0.590201239	0.607768286	0.316077262	0.178406359	0.194401235	0.655588363	1.686090167	0.286780503	0.391961991	0.252069794	0.309576131	0.397754708	0.76391444	0.752215248	0.245668193	0.878377495	0.017113237	0.096332789	0.874883178	0.941184238	0.900741611	1.173933555	0.351096269	0.499620617	0.37944683	0.145600488	0.848181638	0.071369326	2.202968063	0.044577718	0.244263902	0.236117813	0.89217741	0.606757025	0.221935197	1.693998402	0.501558266	0.30858637	0.074549014	0.319901229	0.116299593	0.366593207	0.743202322	0.329199287	0.224222065	0.261696143	0.500028769
S12000036	2010	0.48168365	0.606370459	0.61305306	0.309151965	0.17655849	0.183826789	0.662341615	1.722172135	0.276722979	0.387905678	0.238747145	0.292684831	0.408950502	0.800905504	0.751738134	0.242259242	0.858307156	0.017783842	0.102351867	0.856430088	0.944465711	0.865458573	1.160540854	0.332191362	0.483519929	0.369078324	0.14866072	0.799449326	0.077891026	2.127278814	0.045021058	0.242302449	0.22640851	0.904991169	0.614724735	0.220692792	1.663814318	0.466800874	0.302382447	0.085936688	0.299439424	0.111232865	0.348857022	0.71498889	0.343607998	0.223313662	0.252292257	0.505643426
S12000038	2010	0.462715794	0.584235127	0.587927273	0.305711699	0.164536305	0.177888754	0.626309438	1.753692445	0.276620804	0.379586385	0.238024894	0.285490156	0.383039378	0.785202419	0.740654637	0.239355569	0.846394232	0.016263471	0.09670717	0.836216008	0.926279487	0.843260068	1.134473697	0.325374361	0.470548355	0.365525656	0.138386583	0.771982311	0.071894096	2.123375411	0.046299398	0.232455398	0.22090832	0.869632839	0.610554601	0.210933918	1.551108761	0.458499952	0.292686126	0.083892993	0.29755574	0.111265682	0.325348663	0.704614679	0.339171122	0.210813477	0.240412427	0.491334969
S12000039	2010	0.455591263	0.573884437	0.580736536	0.305843949	0.159739425	0.17754554	0.612679223	1.781798253	0.278363095	0.37563381	0.241201432	0.282835137	0.373396112	0.787603294	0.731397542	0.237105515	0.844648744	0.016066193	0.093993224	0.83994463	0.922435172	0.844867829	1.136243939	0.326683625	0.466926805	0.362780488	0.137477622	0.770015628	0.069942495	2.143267911	0.046233455	0.229679177	0.218628899	0.867917769	0.612877252	0.207876805	1.504818903	0.457927724	0.290221174	0.086883875	0.298469812	0.111413202	0.317034299	0.714775486	0.336968134	0.205839195	0.233570507	0.48553638
S12000040	2010	0.452814908	0.574613484	0.572263301	0.301626085	0.155292706	0.169003382	0.604353277	1.749797997	0.274207416	0.377088409	0.229532606	0.275731285	0.370995643	0.787881538	0.734028798	0.234203648	0.833338031	0.015414137	0.094488625	0.825730475	0.916801379	0.819698229	1.117069358	0.313962484	0.455129983	0.364477423	0.134521818	0.761415629	0.06654527	2.07946308	0.046495364	0.228446785	0.209035831	0.861121316	0.615656119	0.203236468	1.525776594	0.450626651	0.283076791	0.091377767	0.285921833	0.105192541	0.304182196	0.670611778	0.344137266	0.201475135	0.229373242	0.488819085
S12000041	2010	0.483332495	0.581924192	0.594578636	0.312963271	0.167945285	0.184893702	0.632945462	1.70823835	0.282757099	0.386612535	0.245461121	0.296466677	0.385856568	0.772256306	0.745034071	0.239311448	0.857482118	0.016502785	0.093791111	0.856390827	0.931910384	0.871360649	1.150648741	0.339552778	0.482948967	0.37262826	0.140937542	0.811056779	0.069398635	2.161798286	0.044502168	0.23765541	0.225935405	0.878110864	0.609449168	0.214842989	1.600126262	0.481649522	0.29931381	0.080949727	0.310020684	0.112894831	0.341417206	0.718072343	0.334596684	0.216193085	0.249489133	0.491391773
S12000042	2010	0.473173483	0.586085231	0.594856219	0.30968396	0.166888892	0.180615141	0.631647416	1.792985439	0.276970593	0.382605491	0.243022982	0.290152684	0.383539273	0.792863881	0.743216661	0.238518076	0.850481383	0.016217184	0.0981223	0.848185499	0.934584539	0.858516704	1.150357264	0.33277123	0.478404893	0.36949894	0.140647995	0.792387641	0.071769698	2.152374805	0.045729982	0.238118235	0.222114726	0.887898012	0.622802905	0.214640024	1.544804307	0.466927008	0.297014867	0.09166111	0.306426351	0.112894557	0.330292534	0.708961555	0.337953274	0.213922646	0.243443195	0.491215999
S12000044	2010	0.449472024	0.572154284	0.57523452	0.305424912	0.156349956	0.171542984	0.602341851	1.809391005	0.275880342	0.377327103	0.235840418	0.279691485	0.368925152	0.792705556	0.733671933	0.236018373	0.83743763	0.01582654	0.094178982	0.829475208	0.920636627	0.831474591	1.126894259	0.320424543	0.458063428	0.365377742	0.134096767	0.763114565	0.066952279	2.115549604	0.045962845	0.228251383	0.213445591	0.860985864	0.618922942	0.204563355	1.492138014	0.452885326	0.286743347	0.095213772	0.291952739	0.109181297	0.306991981	0.689568456	0.341776314	0.201689747	0.229405742	0.48685445
S12000045	2010	0.496776539	0.596247788	0.608161088	0.314962107	0.180505566	0.186012433	0.659714208	1.608858364	0.279125875	0.39107186	0.237120669	0.290991498	0.402927477	0.775828333	0.758206526	0.240951645	0.862608113	0.01695257	0.101002423	0.853997321	0.944679186	0.860283542	1.144321642	0.332859748	0.488741714	0.371896733	0.145067235	0.808310795	0.074495789	2.120800025	0.045277831	0.243414938	0.22630327	0.88964738	0.605904707	0.220022087	1.668514655	0.473834249	0.299589222	0.082699145	0.302141997	0.111720403	0.353407032	0.678277789	0.33617531	0.224839099	0.260677452	0.502730114
S12000046	2010	0.416012748	0.552278532	0.549512646	0.280981061	0.154435544	0.159914772	0.585046677	1.790183876	0.258415386	0.349303675	0.22144945	0.2590644	0.36025624	0.776039329	0.690835015	0.222598496	0.779554419	0.01482646	0.09551172	0.775800648	0.872685438	0.763642918	1.066375689	0.293976828	0.432769541	0.333189066	0.130437356	0.683931258	0.075381708	1.971650005	0.044269281	0.213885538	0.204771309	0.823298829	0.581943589	0.197957297	1.331445857	0.40099231	0.273174702	0.086580733	0.263273822	0.106661231	0.289605638	0.661036562	0.326365306	0.192504802	0.219260436	0.464063414
W06000001	2010	0.480506446	0.562025616	0.58275396	0.308892282	0.16657599	0.184906126	0.621132926	1.671516645	0.27809228	0.376924714	0.243194548	0.294685643	0.376511958	0.740816642	0.722214235	0.235418736	0.840190595	0.015904829	0.090725102	0.837919046	0.905109047	0.858238552	1.127149767	0.337289037	0.475306114	0.365660526	0.139130143	0.803163521	0.067768392	2.122122785	0.042895244	0.231279135	0.223897429	0.852432898	0.587658459	0.212493433	1.532916702	0.477017059	0.295293441	0.077687429	0.309702867	0.112279031	0.347663946	0.711586481	0.318510731	0.214183315	0.248795075	0.473267386
W06000002	2010	0.458841554	0.541979205	0.562310078	0.298376181	0.163457167	0.178655724	0.599529362	1.627375252	0.272704651	0.366548041	0.234889363	0.284749733	0.365003331	0.725442359	0.703466755	0.226332718	0.810646977	0.01522808	0.089136965	0.812883107	0.882606473	0.82326935	1.091903695	0.322764721	0.458004948	0.350132329	0.13315486	0.774285619	0.067559154	2.039235907	0.041580724	0.223585321	0.216103506	0.829646987	0.566816526	0.206126697	1.484421388	0.452642496	0.285293505	0.08012959	0.292270139	0.109644392	0.336181184	0.680746725	0.309618342	0.207292718	0.241576989	0.468862301
W06000003	2010	0.485107502	0.561123449	0.583350927	0.309128614	0.170571346	0.187821612	0.621865632	1.615509143	0.280982757	0.379999415	0.248880289	0.291774197	0.374708415	0.739026858	0.726345129	0.236594504	0.8379661	0.016228431	0.091353508	0.84590248	0.913076464	0.871943286	1.13455258	0.343293674	0.476909744	0.362094776	0.137917616	0.799773207	0.069470297	2.139946582	0.04353266	0.234559141	0.226837009	0.849555206	0.588864486	0.216341003	1.505261914	0.474936313	0.29815025	0.0755022	0.313343203	0.114495825	0.350470319	0.710089729	0.313564873	0.216336987	0.252141141	0.474596573
W06000004	2010	0.464893109	0.551530347	0.569127058	0.302346823	0.163233538	0.182166689	0.604075233	1.6527426	0.279520468	0.37407273	0.24378743	0.287911458	0.366224771	0.745774779	0.716441699	0.23139014	0.824902239	0.015633007	0.088788196	0.833323197	0.903124419	0.844564962	1.11682654	0.332604536	0.467195424	0.355464023	0.134327659	0.78113122	0.069032622	2.086333529	0.042861922	0.22860988	0.218473302	0.847928099	0.587475821	0.209995701	1.454080244	0.462097322	0.291645783	0.083203258	0.302931274	0.111941075	0.334093747	0.69224315	0.316681842	0.209013783	0.240593119	0.472963474
W06000005	2010	0.461721507	0.56285994	0.570985952	0.302811089	0.159897029	0.173954115	0.605693172	1.682318055	0.271130054	0.372340067	0.232269702	0.281095549	0.369651274	0.757208472	0.723466972	0.231079127	0.823954983	0.015833542	0.091543062	0.824489653	0.899329465	0.832324068	1.107141904	0.321060409	0.45852554	0.359102607	0.136031913	0.772211777	0.066221579	2.069314901	0.044331535	0.22823193	0.21293809	0.837671169	0.598376164	0.205128305	1.528962114	0.457331321	0.286243741	0.087068074	0.293405173	0.106406691	0.323113404	0.681187869	0.326872391	0.204272131	0.237300969	0.47657415
W06000006	2010	0.45023395	0.554212342	0.558732923	0.297637018	0.154124229	0.16947362	0.593889268	1.650464114	0.270323495	0.368532651	0.229018143	0.271413739	0.362688687	0.756907007	0.71359675	0.227228356	0.808352943	0.015054954	0.090270846	0.812100821	0.890722204	0.813871262	1.093679957	0.31282369	0.449952045	0.354020525	0.132231707	0.750539565	0.065330753	2.037694561	0.043809615	0.223929342	0.207832227	0.827433272	0.59189055	0.202645344	1.470986125	0.444119871	0.281605765	0.0871138	0.284222289	0.104329536	0.308044809	0.665508173	0.325795906	0.19998317	0.230031437	0.470990082
W06000008	2010	0.466025887	0.550411152	0.568281416	0.298703532	0.166314928	0.181402623	0.608913276	1.691790455	0.27163825	0.365530992	0.236750354	0.292740878	0.370883394	0.731208	0.713136082	0.224443005	0.823416001	0.015253364	0.089335227	0.81896331	0.880890204	0.826780012	1.099081104	0.327329395	0.467021551	0.356888373	0.135387936	0.79198959	0.068006287	2.056870839	0.041744597	0.22525038	0.219254611	0.837348619	0.567611397	0.209110297	1.512761563	0.460555441	0.289095487	0.078441034	0.300664823	0.111315826	0.349203049	0.691492699	0.309974313	0.209595935	0.247196863	0.469444603
W06000009	2010	0.480900369	0.561642326	0.581735399	0.306029345	0.169899184	0.184986571	0.61882022	1.612269521	0.279298043	0.373775712	0.243378515	0.29612303	0.377637079	0.736939465	0.720088167	0.236096488	0.838045493	0.016217036	0.090763858	0.837115473	0.905316726	0.85250546	1.122501278	0.336492323	0.473142279	0.362117221	0.138451732	0.80127173	0.069482078	2.097597383	0.043261553	0.231181674	0.221753471	0.847757167	0.580871124	0.211839781	1.545928864	0.469372462	0.292572109	0.080356907	0.306548472	0.113063156	0.350017997	0.689743901	0.315780957	0.212879521	0.250990074	0.477025775
W06000010	2010	0.469862841	0.560795298	0.577605193	0.303364162	0.163718022	0.180223475	0.609362125	1.676777317	0.275688241	0.37313805	0.24258207	0.28881089	0.370365076	0.749355117	0.719694059	0.234354658	0.830752714	0.015687642	0.091484183	0.832002555	0.904098762	0.846777701	1.12213585	0.333063448	0.466334057	0.361296832	0.136347318	0.783719898	0.068015719	2.106105595	0.043548471	0.230535966	0.220087137	0.846125996	0.591537112	0.209724675	1.483977086	0.463209442	0.290797509	0.084093646	0.304580038	0.11220737	0.33531636	0.687442454	0.318009425	0.208537021	0.243283018	0.473684345
W06000011	2010	0.438809899	0.538694344	0.548831333	0.285585099	0.156509096	0.169430128	0.583955334	1.620716122	0.261589344	0.354585822	0.226911492	0.26608666	0.357104005	0.734715501	0.692133852	0.223356329	0.782827922	0.015246155	0.089984542	0.786253121	0.867188739	0.794750927	1.067360401	0.309088697	0.440662322	0.338409781	0.131271299	0.726795133	0.068836587	1.979691367	0.0423976	0.218977942	0.207324446	0.81395483	0.568149088	0.199848775	1.378902473	0.428594705	0.276191823	0.079014879	0.279429403	0.10643591	0.31207509	0.651123224	0.311632242	0.198334412	0.229828976	0.454039126
W06000012	2010	0.455293897	0.566057756	0.57303424	0.305272268	0.159166008	0.176536077	0.602543386	1.763565425	0.271956991	0.372666861	0.241421925	0.284153183	0.36592128	0.773020197	0.722324831	0.234019965	0.83439374	0.016585127	0.092896981	0.828701596	0.904371905	0.841149214	1.122479021	0.329340814	0.461655387	0.357139805	0.132630954	0.771041139	0.06762195	2.114103617	0.0440758	0.228366739	0.218785218	0.840119485	0.602123156	0.207197497	1.46029448	0.455432358	0.289087602	0.091055995	0.299922212	0.112228889	0.325959018	0.695164393	0.326310666	0.20388342	0.236847363	0.472470954
W06000013	2010	0.460800614	0.564151454	0.571583184	0.305031467	0.159502994	0.176078159	0.603035212	1.726512123	0.274349934	0.374384509	0.237015533	0.282320215	0.368033604	0.772741127	0.724952005	0.232754239	0.834298782	0.01619222	0.091350189	0.83218626	0.908067486	0.840375143	1.123747028	0.326541799	0.460354734	0.356698858	0.135295127	0.775286667	0.067368586	2.099184192	0.045026783	0.229163296	0.215051336	0.848489258	0.602804751	0.206317113	1.481474889	0.45607192	0.287344278	0.089879482	0.295936611	0.109840074	0.322601094	0.686107495	0.329454707	0.20340261	0.235616033	0.482847804
W06000014	2010	0.469708807	0.566266051	0.576855338	0.306801323	0.166190736	0.178523252	0.621203328	1.590559094	0.275397915	0.377254089	0.232525199	0.280184676	0.382683621	0.756062726	0.722742158	0.23474802	0.835799959	0.01686672	0.093078763	0.826738735	0.907560514	0.837720914	1.111329649	0.323680897	0.463843538	0.358880916	0.136424417	0.77299493	0.06922891	2.068637614	0.044394618	0.231401059	0.21634959	0.842961784	0.590260225	0.209741117	1.556560857	0.457626631	0.288415694	0.08309061	0.291818292	0.107535382	0.335842071	0.674772804	0.326552803	0.211352264	0.243467845	0.48588007
W06000015	2010	0.405738058	0.520441558	0.526579841	0.266005205	0.155418623	0.151550307	0.572050402	1.580639192	0.243576034	0.332448194	0.20197433	0.240236275	0.35204937	0.726212381	0.655549908	0.208779015	0.724489786	0.01393721	0.09305556	0.728452459	0.832629754	0.71021046	0.992673003	0.272628237	0.405625279	0.31040201	0.12585686	0.652168157	0.073721302	1.77754048	0.040678281	0.207010634	0.189233263	0.779021424	0.538444264	0.192633081	1.288234932	0.369702701	0.260069191	0.087217519	0.241904687	0.097545121	0.293282422	0.584795223	0.301211015	0.190687252	0.217154142	0.451311441
W06000016	2010	0.440666656	0.550310512	0.555147451	0.296198962	0.151554635	0.168915743	0.579305954	1.769399582	0.269115119	0.36313103	0.235257543	0.274018384	0.352267034	0.766400833	0.707313681	0.229324641	0.811607974	0.015523946	0.089770676	0.80844849	0.887281386	0.81491866	1.09937569	0.317652489	0.445653459	0.351171399	0.129856682	0.743651995	0.065332151	2.065971962	0.044475709	0.22158009	0.209008145	0.828823949	0.597845183	0.200352053	1.381692922	0.439321884	0.27972191	0.093945662	0.290156156	0.109131015	0.305062926	0.671895088	0.323516246	0.195354654	0.224668494	0.46487431
W06000018	2010	0.446597785	0.557402557	0.560724907	0.299885072	0.15197624	0.170427225	0.584640565	1.759689026	0.272488402	0.367794886	0.235234309	0.276137637	0.356348077	0.773681616	0.717378048	0.231418864	0.820668026	0.015988403	0.090484404	0.814648075	0.894439111	0.81801278	1.108149572	0.319553915	0.44957393	0.354822102	0.13215104	0.75680096	0.065479246	2.077155265	0.045059471	0.223168303	0.209177176	0.834068424	0.603327381	0.201049653	1.41972992	0.445770336	0.281205269	0.095748116	0.292219435	0.109190931	0.306906207	0.669256733	0.329600755	0.196132018	0.227232249	0.469197381
W06000019	2010	0.435662887	0.54904943	0.561171257	0.301329196	0.149075128	0.171059533	0.57545487	1.844462699	0.273184504	0.366351015	0.241731427	0.281387502	0.350311097	0.770982006	0.714930147	0.234377181	0.814262748	0.015490504	0.087832348	0.816055809	0.895323981	0.827261767	1.1122719	0.323668967	0.450243873	0.355557344	0.129265819	0.743077869	0.066499988	2.116394783	0.043818573	0.218943405	0.212350228	0.835521617	0.607172643	0.199726487	1.362808768	0.446292031	0.282278235	0.093780595	0.301378783	0.11212237	0.302266222	0.689985223	0.330185828	0.19499478	0.222250132	0.460585967
W06000020	2010	0.451791608	0.556848321	0.561969599	0.302116765	0.152559549	0.172543627	0.591498879	1.709101272	0.270324454	0.370001681	0.233929954	0.27709994	0.361306151	0.760982327	0.719179923	0.229078866	0.812705118	0.016143011	0.091566663	0.81012445	0.887478908	0.818238543	1.100316661	0.319678887	0.454529558	0.352668079	0.133232256	0.762020867	0.065863056	2.076101116	0.043531821	0.22523992	0.211142991	0.83741592	0.596071361	0.202310145	1.461320274	0.44760509	0.281897959	0.093328618	0.295064734	0.108150018	0.313672477	0.670503411	0.327721601	0.199644595	0.229464448	0.463745377
W06000021	2010	0.494684084	0.574295568	0.590817898	0.30716796	0.174608638	0.185849225	0.640636556	1.538536059	0.278094905	0.383320904	0.23782278	0.294287431	0.392373962	0.745510483	0.737837847	0.237581115	0.845852929	0.016668899	0.0944369	0.847213255	0.919043202	0.86599854	1.128386812	0.335178072	0.480640369	0.367308436	0.141023235	0.811307847	0.069671182	2.10006956	0.04324947	0.238914308	0.224038997	0.859691202	0.588244192	0.216156133	1.642339982	0.47747525	0.297057725	0.075961059	0.302512028	0.109968758	0.35653519	0.679245087	0.321617076	0.219091331	0.256080169	0.490284621
W06000022	2010	0.431164079	0.53549804	0.545311147	0.287111449	0.154848887	0.163738826	0.579545722	1.622431325	0.26162476	0.356834997	0.220650934	0.259735701	0.353119928	0.744141852	0.692154774	0.222629674	0.771904171	0.014659797	0.09097981	0.779064043	0.871427061	0.779293328	1.055824571	0.301203497	0.429463266	0.33685649	0.128262173	0.711331657	0.068834695	1.946069165	0.043219825	0.21816925	0.201109206	0.817429828	0.573894125	0.199754956	1.348734467	0.417503407	0.272271531	0.089025031	0.273760229	0.103386148	0.298361035	0.631168967	0.314835487	0.19706296	0.222641231	0.458600301
W06000023	2010	0.49004188	0.56290794	0.58915586	0.305122734	0.17510479	0.188122904	0.631819242	1.604326407	0.279623867	0.378350576	0.243636428	0.300841688	0.385041209	0.732752903	0.722824048	0.238267047	0.844475372	0.015837167	0.092260407	0.848081104	0.913813591	0.870639712	1.132550879	0.3409387	0.480609868	0.36893344	0.14103211	0.820774355	0.069398757	2.116442808	0.041855739	0.23508999	0.225146959	0.865874112	0.583602807	0.214816391	1.579580543	0.482826037	0.297946081	0.071866194	0.311958132	0.112673676	0.357065245	0.699780108	0.314460595	0.218767312	0.254109852	0.48320227
W06000024	2010	0.438921524	0.555386628	0.557441432	0.293753493	0.152587119	0.168491576	0.581731819	1.795538549	0.265940934	0.36023803	0.234111805	0.273212463	0.353256729	0.767480759	0.70934967	0.229185386	0.808325492	0.01530964	0.093529417	0.804936051	0.885536107	0.80503667	1.099499518	0.316243158	0.447925146	0.351739868	0.128732645	0.73821173	0.066866477	2.060625968	0.04428021	0.223830569	0.207028496	0.834630074	0.601964333	0.201571442	1.384685373	0.435674163	0.27910546	0.098897886	0.293050231	0.109038995	0.301303712	0.64846861	0.327315631	0.195979152	0.223166206	0.463443797
[truncated: 58 more columns]
